# Supplementary material
Source: PubMed Central journal article supplement (PMC4560367)
Supplement: NIHMS589200-supplement-Supplementary_Materials.pdf [file NIHMS589200-supplement-Supplementary_Materials.pdf]

# Supplementary Material for “Functional Additive Mixed Models”

Fabian Scheipl\*, Ana-Maria Staicu, Sonja Greven

November 18, 2013

---

\*[fabian.scheipl@stat.uni-muenchen.de](mailto:fabian.scheipl@stat.uni-muenchen.de)

# Contents

|          |                                                                                                                                |           |
|----------|--------------------------------------------------------------------------------------------------------------------------------|-----------|
| <b>A</b> | <b>Identifiability constraints for additive models for functional responses</b>                                                | <b>3</b>  |
| A.1      | Deriving and imposing suitable constraints . . . . .                                                                           | 3         |
| A.2      | Data Example . . . . .                                                                                                         | 4         |
| <b>B</b> | <b>Simulation study</b>                                                                                                        | <b>7</b>  |
| B.1      | Data generating process . . . . .                                                                                              | 7         |
| B.2      | Relative integrated mean square errors . . . . .                                                                               | 7         |
| B.3      | Coverage . . . . .                                                                                                             | 18        |
| B.4      | Comparison to FPC-based approaches . . . . .                                                                                   | 25        |
| B.5      | Exemplary data sets and fits . . . . .                                                                                         | 27        |
| B.5.1    | Scenario 1 . . . . .                                                                                                           | 27        |
| B.5.2    | Scenario 2 . . . . .                                                                                                           | 31        |
| B.5.3    | Scenario 3 . . . . .                                                                                                           | 34        |
| B.5.4    | Scenario 4 . . . . .                                                                                                           | 37        |
| B.6      | Comparison to WFMM . . . . .                                                                                                   | 40        |
| <b>C</b> | <b>Predicting Precipitation Profiles from Temperature Curves for the Canadian Weather Data</b>                                 | <b>43</b> |
| C.1      | Model 1: Time-varying smooth effect for smooth spatially correlated residual curves. . . . .                                   | 43        |
| C.2      | Model 2: Time-varying regional effects and spatially un-correlated residual curves . . . . .                                   | 50        |
| C.3      | Models 3-6: Time-varying regional effects and spatially correlated residual curves with fixed correlation structures . . . . . | 53        |
| C.4      | Model 6b: FPC-based function-on-function effect . . . . .                                                                      | 63        |

# 1 Overview

2 This supplement is divided into three parts. Section A gives details about suitable identifiability  
3 constraints for the additive models for functional responses and an illustrative example in Section  
4 A.2.

5 Section B provides more details about the simulation study in the main article: Section B.1 offers a  
6 detailed description of the data generating processes used for the simulation, Sections B.2 to Sections  
7 B.4 give the unabridged simulation results, and Section B.5 shows examples of the generated data  
8 and fitted models for the various settings. Section B.6 gives the full results for the comparison to  
9 WFMM (Herrick, 2013).

10 Section C is a fully reproducible and extended treatment of the Canadian Weather Data example.

## 11 A Identifiability constraints for additive models for functional re- 12 sponses

### 13 A.1 Deriving and imposing suitable constraints

14 The issue is that

$$y_{ij}(t) = g_0(t) + g(z_{ij}, t) + b_{0i}(t) + \epsilon_{ij}(t),$$

15 is not identifiable in the sense that

$$y_{ij}(t) = g_0(t) + \bar{g}_z(t) + (g(z_{ij}, t) - \bar{g}_z(t)) + \bar{b}_0(t) + (b_{0i}(t) - \bar{b}_0(t)) + \epsilon_{ij}(t)$$

16 with  $\bar{b}_0(t) = (\sum_i n_i)^{-1} \sum_i n_i b_{0i}(t)$ ,  $\bar{g}_z(t) = n^{-1} \sum_{i,j} g(z_{ij}, t)$  etc., with  $n = \sum_i n_i$ , yields exactly the  
17 same fit.

18 If we fit the model above with the constraints that  $\bar{g}_z(t), \bar{b}_0(t)$  are constant zero across  $\mathcal{T}$ , i.e., with  
19 the constraint  $(\sum_i n_i)^{-1} \sum_i n_i b_{0i}(t) = n^{-1} \sum_{i,j} g(z_{ij}, t) = 0 \forall t$ , we get a model with interpretable  
20 effects in the sense that:

- 21 •  $g_0(t)$  is the (smoothed) sample mean of  $Y(t)$ ,
- 22 • effects that vary over the index of  $Y(t)$  are directly interpretable as deviations from this sample  
23 mean trajectory.

24 The default sum-to-zero constraints  $\sum_{i,t} f(z_i, t) = 0$  implemented in `mgcv` do not yield effects that  
25 are interpretable like this, see Section A.2 below for an illustrative example.

Consider a function

$$f(\mathbf{z}, \mathbf{t}) = \begin{pmatrix} f(z_1, t_1) \\ f(z_1, t_2) \\ \vdots \\ f(z_1, t_G) \\ f(z_2, t_1) \\ \vdots \\ f(z_n, t_G) \end{pmatrix} \approx \mathbf{B}\boldsymbol{\theta}$$

with a  $n \times K = K_z K_t$  tensor product basis function matrix  $\mathbf{B}$ , where each row of  $\mathbf{B}$  is the tensor product of the associated marginal basis functions  $\mathbf{B}'_z|_{z=z_i} \otimes \mathbf{B}'_t|_{t=t_G}$ , with  $K_z$  marginal basis functions



46 completely misses the true shape of the effects, that the functional intercept in the model with sum-to-  
47 zero- $\forall$ -t constraints is directly interpretable as the mean trajectory in the data, and that estimation  
48 uncertainty is reduced by using the appropriate constraints (c.f. the widths of the confidence intervals  
49 around  $\hat{\beta}_0(t)$ ).

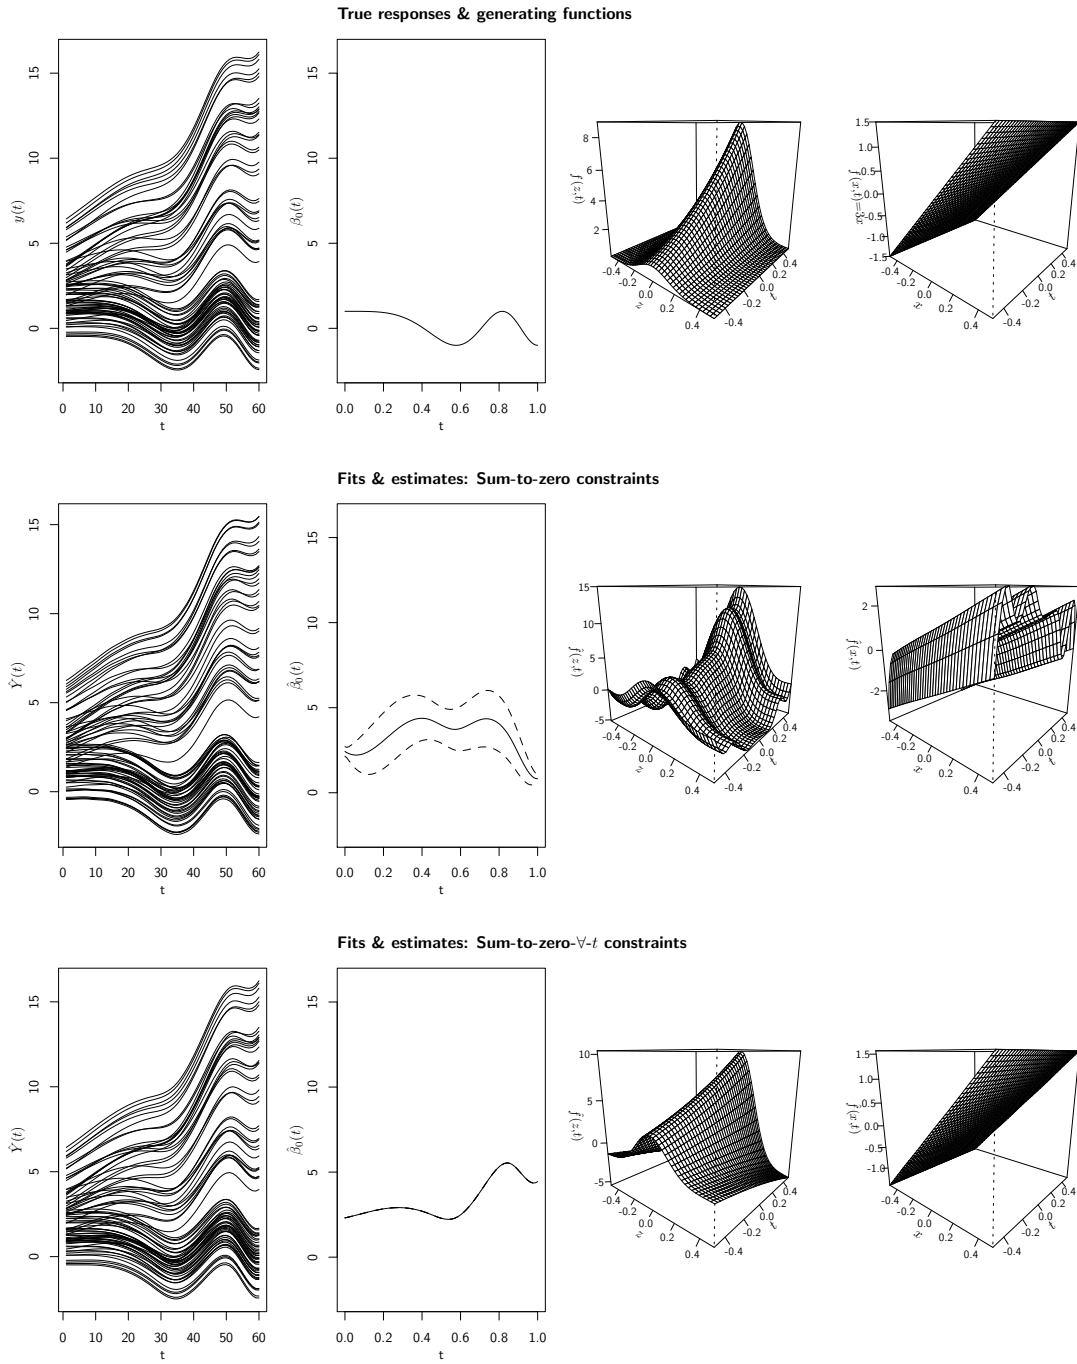

**Figure 1:** True (top row) and estimated effects for the data described in section A.2. Middle row shows effects estimated with the default sum-to-zero constraints, while the bottom row shows effects estimated under the sum-to-zero- $\forall$ -t constraints.

## 50 B Simulation study

### 51 B.1 Data generating process

This subsection describes in detail the data generating process used for the simulation study in the article. We use

$$\alpha(t) = t^2 - \sqrt{t} + \phi(t, 0.2, 0.1) + \phi(t, 0.6, 0.4) - f_B(t, 7, 4) + f_B(t, 9, 9),$$

where  $\phi(\cdot, \mu, \sigma)$  is a  $N(\mu, \sigma^2)$ -density and  $f_B(\cdot, a, b)$  is a Beta( $a, b$ )-density,

$$\begin{aligned}\beta_1(s, t) &= s \cos(\pi|s - t|) - 0.19 \\ \beta_2(s, t) &= \cos(\pi s) \sin(\pi t) + (st)^2 - 0.11,\end{aligned}$$

52 Functional random effects  $b_{i0}(t), b_{i1}(t)$  and functional covariates  $x_{1i}(s), x_{2i}(s)$  are generated from  
53 a cubic B-spline basis with 5 basis functions whose coefficients are i. i. d.  $N(0, 1)$  and centered so  
54 that  $\sum_i b_i(t) = \sum_i x_i(t) = 0 \forall t$ . For the scalar covariates,  $z_{1,ij} \stackrel{\text{i.i.d.}}{\sim} U[-0.5, 0.5]$  and  $z_{2,ij} \stackrel{\text{i.i.d.}}{\sim} U[0, 1]$ .  
55 Residuals  $\varepsilon_{ij}(t)$  are i. i. d. Gaussian, with variance  $\sigma_\varepsilon^2$  determined by the signal-to-noise ratio  $\text{SNR}_\varepsilon$   
56 of the setting.

### 57 B.2 Relative integrated mean square errors

58 The following graphs display the relative integrated mean squared error  $\text{rIMSE}(\hat{f}(t)) = \frac{\int (\hat{f}(t) - f(t))^2 dt}{\int f(t)^2 dt}$   
59 for the various scenarios and settings. Tables give estimated coefficients for main effect models for  
60  $\log_2(\text{rIMSE})$  with the various settings under the different scenarios. Note that we are evaluating the  
61 estimation accuracy of the effects on the scale of the response, not on the scale of the coefficient  
62 function itself, e.g. for the effect of a functional covariate  $x(s)$  we consider the error  $\int_{\mathcal{T}} \int_{\mathcal{S}} (x(s)\hat{\beta}(s, t) -$   
63  $x(s)\beta(s, t))^2 ds dt$  (and not  $\int_{\mathcal{T}} \int_{\mathcal{S}} (\hat{\beta}(s, t) - \beta(s, t))^2 ds dt$ ).

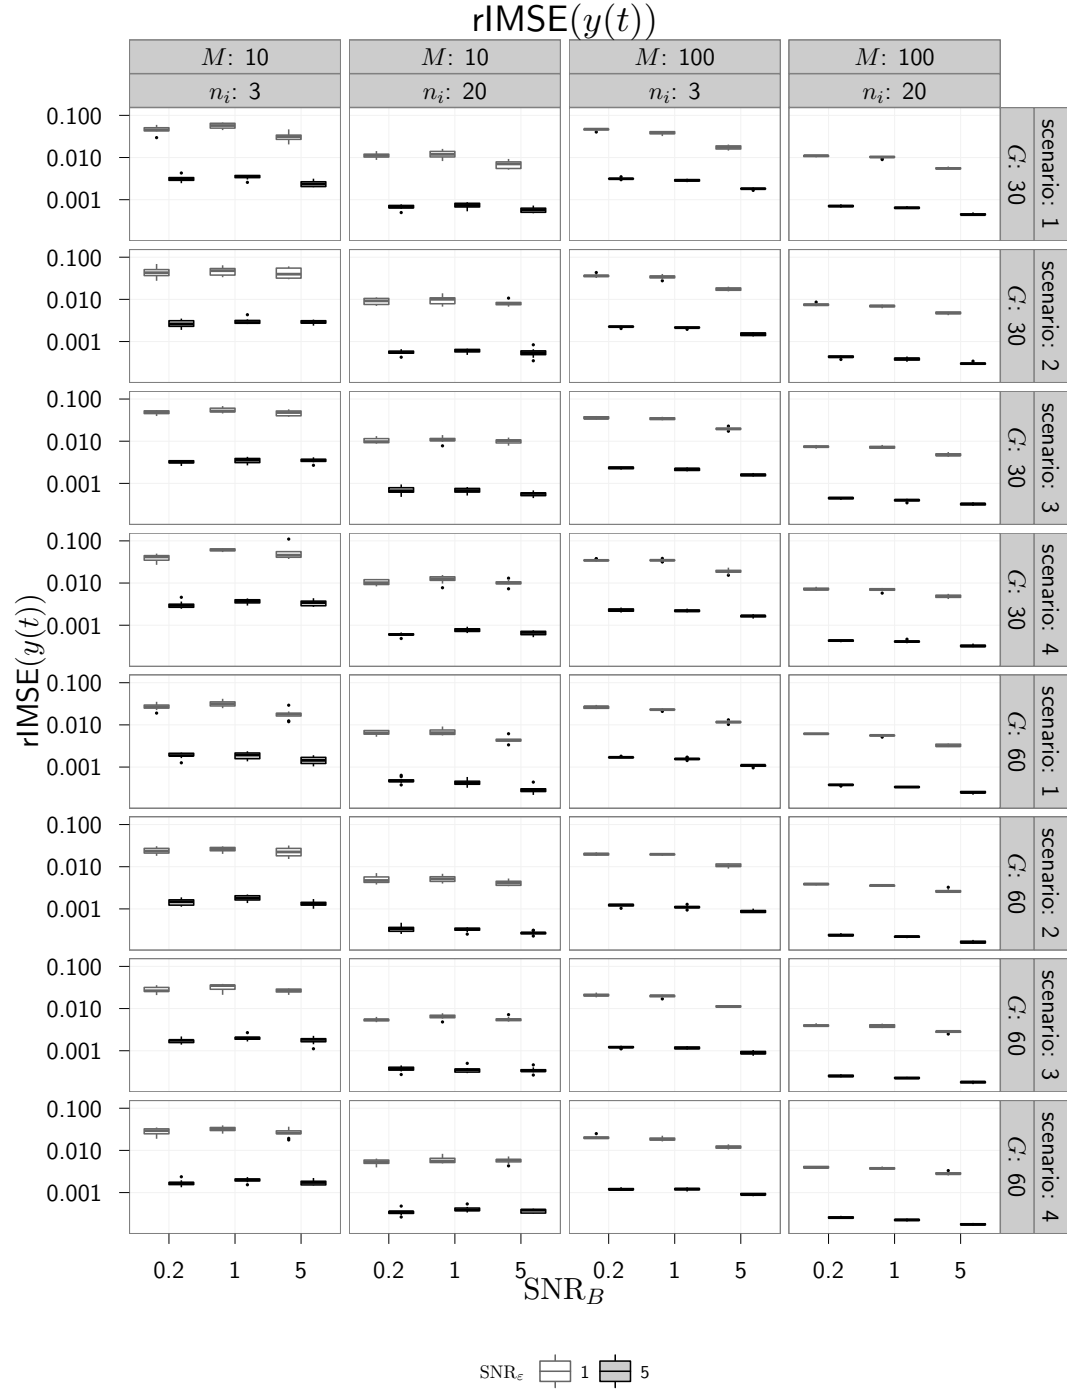

**Figure 2:** rIMSE for  $\hat{y}(t)$  for all combinations of the various settings.



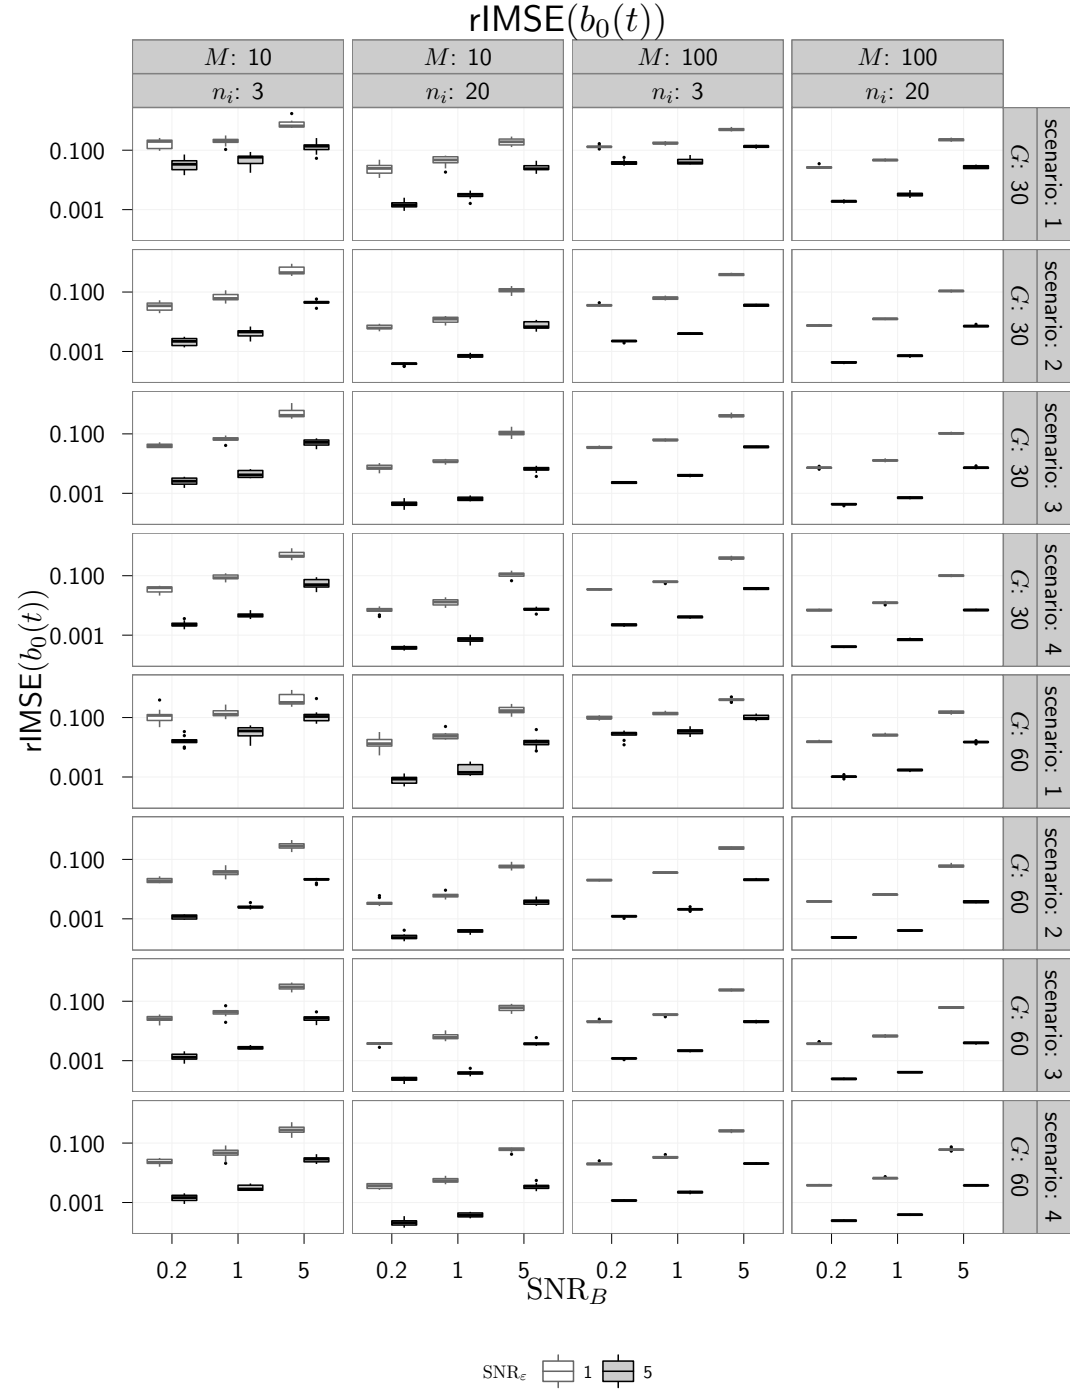

**Figure 3:**  $\text{rIMSE}$  for  $\hat{b}_0(t)$  for all combinations of the various settings.

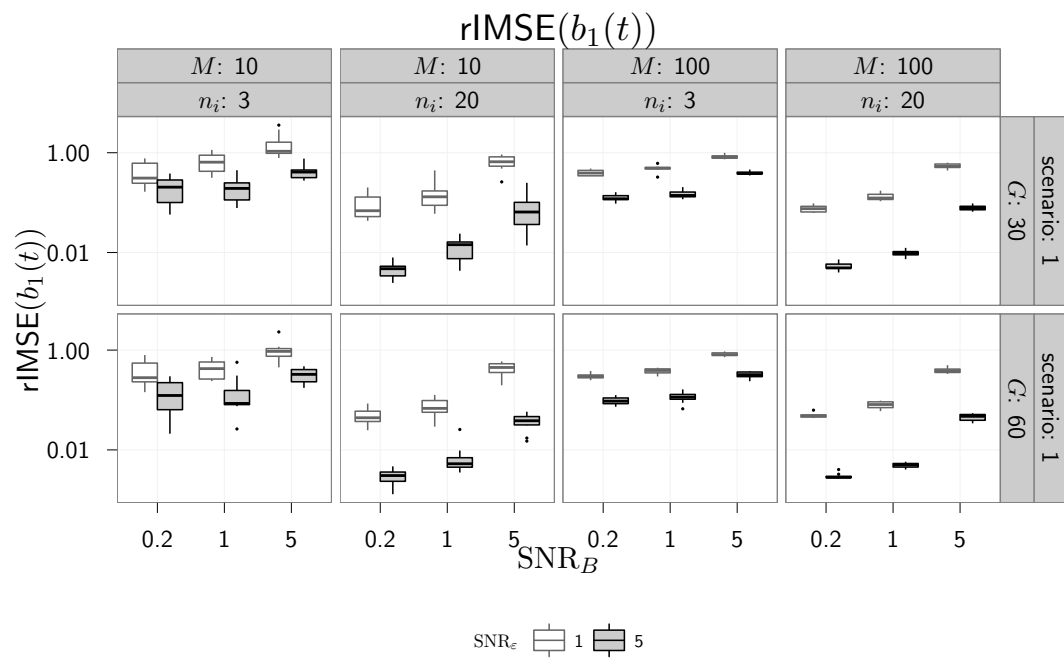

**Figure 4:** rIMSE for  $\hat{b}_1(t)$  for all combinations of the various settings.

|                 | scenario | setting                                    | high | low  | estimate |
|-----------------|----------|--------------------------------------------|------|------|----------|
| rIMSE( $y(t)$ ) | 1        | baseline                                   | 0.05 | 0.05 | 0.05     |
| rIMSE( $y(t)$ ) | 2        | baseline                                   | 0.05 | 0.05 | 0.05     |
| rIMSE( $y(t)$ ) | 3        | baseline                                   | 0.06 | 0.05 | 0.05     |
| rIMSE( $y(t)$ ) | 4        | baseline                                   | 0.05 | 0.05 | 0.05     |
| rIMSE( $y(t)$ ) | 1        | $M : 10 \rightarrow 100$                   | 0.85 | 0.80 | 0.83     |
| rIMSE( $y(t)$ ) | 2        | $M : 10 \rightarrow 100$                   | 0.70 | 0.66 | 0.68     |
| rIMSE( $y(t)$ ) | 3        | $M : 10 \rightarrow 100$                   | 0.62 | 0.58 | 0.60     |
| rIMSE( $y(t)$ ) | 4        | $M : 10 \rightarrow 100$                   | 0.61 | 0.57 | 0.59     |
| rIMSE( $y(t)$ ) | 1        | $n_i : 3 \rightarrow 20$                   | 0.24 | 0.23 | 0.23     |
| rIMSE( $y(t)$ ) | 2        | $n_i : 3 \rightarrow 20$                   | 0.21 | 0.20 | 0.20     |
| rIMSE( $y(t)$ ) | 3        | $n_i : 3 \rightarrow 20$                   | 0.21 | 0.20 | 0.20     |
| rIMSE( $y(t)$ ) | 4        | $n_i : 3 \rightarrow 20$                   | 0.21 | 0.20 | 0.21     |
| rIMSE( $y(t)$ ) | 1        | $G : 30 \rightarrow 60$                    | 0.59 | 0.56 | 0.58     |
| rIMSE( $y(t)$ ) | 2        | $G : 30 \rightarrow 60$                    | 0.56 | 0.53 | 0.54     |
| rIMSE( $y(t)$ ) | 3        | $G : 30 \rightarrow 60$                    | 0.57 | 0.54 | 0.56     |
| rIMSE( $y(t)$ ) | 4        | $G : 30 \rightarrow 60$                    | 0.57 | 0.54 | 0.55     |
| rIMSE( $y(t)$ ) | 1        | $\text{SNR}_B : 0.2 \rightarrow 1$         | 1.02 | 0.95 | 0.98     |
| rIMSE( $y(t)$ ) | 2        | $\text{SNR}_B : 0.2 \rightarrow 1$         | 1.04 | 0.96 | 1.00     |
| rIMSE( $y(t)$ ) | 3        | $\text{SNR}_B : 0.2 \rightarrow 1$         | 1.05 | 0.98 | 1.01     |
| rIMSE( $y(t)$ ) | 4        | $\text{SNR}_B : 0.2 \rightarrow 1$         | 1.12 | 1.04 | 1.08     |
| rIMSE( $y(t)$ ) | 1        | $\text{SNR}_B : 0.2 \rightarrow 5$         | 0.63 | 0.59 | 0.61     |
| rIMSE( $y(t)$ ) | 2        | $\text{SNR}_B : 0.2 \rightarrow 5$         | 0.79 | 0.74 | 0.76     |
| rIMSE( $y(t)$ ) | 3        | $\text{SNR}_B : 0.2 \rightarrow 5$         | 0.83 | 0.77 | 0.80     |
| rIMSE( $y(t)$ ) | 4        | $\text{SNR}_B : 0.2 \rightarrow 5$         | 0.88 | 0.82 | 0.85     |
| rIMSE( $y(t)$ ) | 1        | $\text{SNR}_\varepsilon : 1 \rightarrow 5$ | 0.07 | 0.07 | 0.07     |
| rIMSE( $y(t)$ ) | 2        | $\text{SNR}_\varepsilon : 1 \rightarrow 5$ | 0.07 | 0.06 | 0.06     |
| rIMSE( $y(t)$ ) | 3        | $\text{SNR}_\varepsilon : 1 \rightarrow 5$ | 0.07 | 0.06 | 0.06     |
| rIMSE( $y(t)$ ) | 4        | $\text{SNR}_\varepsilon : 1 \rightarrow 5$ | 0.07 | 0.06 | 0.06     |

**Table 1:** Exponentiated coefficient estimates (i.e., multiplication factors) for the  $\log_2$ -linear model for rIMSE( $y(t)$ ). “High” and “low” estimates are estimated coefficients  $\pm 2$  standard deviations, exponentiated.

|                   | scenario | setting                                    | high  | low   | estimate |
|-------------------|----------|--------------------------------------------|-------|-------|----------|
| rIMSE( $b_0(t)$ ) | 1        | baseline                                   | 0.16  | 0.14  | 0.15     |
| rIMSE( $b_0(t)$ ) | 2        | baseline                                   | 0.04  | 0.03  | 0.03     |
| rIMSE( $b_0(t)$ ) | 3        | baseline                                   | 0.04  | 0.04  | 0.04     |
| rIMSE( $b_0(t)$ ) | 4        | baseline                                   | 0.04  | 0.03  | 0.04     |
| rIMSE( $b_0(t)$ ) | 1        | $M : 10 \rightarrow 100$                   | 1.09  | 0.98  | 1.03     |
| rIMSE( $b_0(t)$ ) | 2        | $M : 10 \rightarrow 100$                   | 1.04  | 0.94  | 0.99     |
| rIMSE( $b_0(t)$ ) | 3        | $M : 10 \rightarrow 100$                   | 0.99  | 0.89  | 0.94     |
| rIMSE( $b_0(t)$ ) | 4        | $M : 10 \rightarrow 100$                   | 0.97  | 0.87  | 0.92     |
| rIMSE( $b_0(t)$ ) | 1        | $n_i : 3 \rightarrow 20$                   | 0.14  | 0.13  | 0.13     |
| rIMSE( $b_0(t)$ ) | 2        | $n_i : 3 \rightarrow 20$                   | 0.20  | 0.18  | 0.19     |
| rIMSE( $b_0(t)$ ) | 3        | $n_i : 3 \rightarrow 20$                   | 0.19  | 0.17  | 0.18     |
| rIMSE( $b_0(t)$ ) | 4        | $n_i : 3 \rightarrow 20$                   | 0.19  | 0.17  | 0.18     |
| rIMSE( $b_0(t)$ ) | 1        | $G : 30 \rightarrow 60$                    | 0.69  | 0.61  | 0.65     |
| rIMSE( $b_0(t)$ ) | 2        | $G : 30 \rightarrow 60$                    | 0.58  | 0.52  | 0.55     |
| rIMSE( $b_0(t)$ ) | 3        | $G : 30 \rightarrow 60$                    | 0.60  | 0.53  | 0.56     |
| rIMSE( $b_0(t)$ ) | 4        | $G : 30 \rightarrow 60$                    | 0.59  | 0.53  | 0.56     |
| rIMSE( $b_0(t)$ ) | 1        | $\text{SNR}_B : 0.2 \rightarrow 1$         | 1.67  | 1.46  | 1.56     |
| rIMSE( $b_0(t)$ ) | 2        | $\text{SNR}_B : 0.2 \rightarrow 1$         | 1.92  | 1.67  | 1.79     |
| rIMSE( $b_0(t)$ ) | 3        | $\text{SNR}_B : 0.2 \rightarrow 1$         | 1.83  | 1.60  | 1.71     |
| rIMSE( $b_0(t)$ ) | 4        | $\text{SNR}_B : 0.2 \rightarrow 1$         | 1.98  | 1.73  | 1.85     |
| rIMSE( $b_0(t)$ ) | 1        | $\text{SNR}_B : 0.2 \rightarrow 5$         | 7.67  | 6.69  | 7.16     |
| rIMSE( $b_0(t)$ ) | 2        | $\text{SNR}_B : 0.2 \rightarrow 5$         | 16.92 | 14.78 | 15.81    |
| rIMSE( $b_0(t)$ ) | 3        | $\text{SNR}_B : 0.2 \rightarrow 5$         | 16.16 | 14.11 | 15.10    |
| rIMSE( $b_0(t)$ ) | 4        | $\text{SNR}_B : 0.2 \rightarrow 5$         | 17.04 | 14.88 | 15.92    |
| rIMSE( $b_0(t)$ ) | 1        | $\text{SNR}_\varepsilon : 1 \rightarrow 5$ | 0.14  | 0.13  | 0.14     |
| rIMSE( $b_0(t)$ ) | 2        | $\text{SNR}_\varepsilon : 1 \rightarrow 5$ | 0.07  | 0.06  | 0.07     |
| rIMSE( $b_0(t)$ ) | 3        | $\text{SNR}_\varepsilon : 1 \rightarrow 5$ | 0.07  | 0.06  | 0.07     |
| rIMSE( $b_0(t)$ ) | 4        | $\text{SNR}_\varepsilon : 1 \rightarrow 5$ | 0.07  | 0.06  | 0.07     |

**Table 2:** Exponentiated coefficient estimates (i.e., multiplication factors) for the  $\log_2$ -linear model for  $\text{rIMSE}(b_0(t))$ . “High” and “low” estimates are estimated coefficients  $\pm 2$  standard deviations, exponentiated.

|                   | scenario | setting                                    | high | low  | estimate |
|-------------------|----------|--------------------------------------------|------|------|----------|
| rIMSE( $b_1(t)$ ) | 1        | baseline                                   | 0.56 | 0.41 | 0.48     |
| rIMSE( $b_1(t)$ ) | 1        | $M : 10 \rightarrow 100$                   | 1.05 | 0.84 | 0.94     |
| rIMSE( $b_1(t)$ ) | 1        | $G : 30 \rightarrow 60$                    | 0.74 | 0.60 | 0.67     |
| rIMSE( $b_1(t)$ ) | 1        | $\text{SNR}_\varepsilon : 1 \rightarrow 5$ | 0.19 | 0.15 | 0.17     |
| rIMSE( $b_1(t)$ ) | 1        | $\text{SNR}_B : 0.2 \rightarrow 1$         | 1.70 | 1.29 | 1.48     |
| rIMSE( $b_1(t)$ ) | 1        | $\text{SNR}_B : 0.2 \rightarrow 5$         | 6.28 | 4.77 | 5.48     |
| rIMSE( $b_1(t)$ ) | 1        | $n_i : 3 \rightarrow 20$                   | 0.15 | 0.12 | 0.13     |

**Table 3:** Exponentiated coefficient estimates (i.e., multiplication factors) for the  $\log_2$ -linear models for  $\text{rIMSE}(b_1(t))$ . “High” and “low” estimates are estimated coefficients  $\pm 2$  standard deviations, exponentiated.

|                               | scenario | setting                                    | high | low  | estimate |
|-------------------------------|----------|--------------------------------------------|------|------|----------|
| $\text{rIMSE}(\beta_1(s, t))$ | 2        | baseline                                   | 0.62 | 0.51 | 0.56     |
| $\text{rIMSE}(\beta_1(s, t))$ | 3        | baseline                                   | 0.76 | 0.62 | 0.69     |
| $\text{rIMSE}(\beta_1(s, t))$ | 4        | baseline                                   | 1.31 | 1.08 | 1.19     |
| $\text{rIMSE}(\beta_1(s, t))$ | 2        | $M : 10 \rightarrow 100$                   | 0.14 | 0.12 | 0.13     |
| $\text{rIMSE}(\beta_1(s, t))$ | 3        | $M : 10 \rightarrow 100$                   | 0.14 | 0.12 | 0.13     |
| $\text{rIMSE}(\beta_1(s, t))$ | 4        | $M : 10 \rightarrow 100$                   | 0.13 | 0.12 | 0.12     |
| $\text{rIMSE}(\beta_1(s, t))$ | 2        | $n_i : 3 \rightarrow 20$                   | 0.15 | 0.13 | 0.14     |
| $\text{rIMSE}(\beta_1(s, t))$ | 3        | $n_i : 3 \rightarrow 20$                   | 0.14 | 0.12 | 0.13     |
| $\text{rIMSE}(\beta_1(s, t))$ | 4        | $n_i : 3 \rightarrow 20$                   | 0.14 | 0.13 | 0.13     |
| $\text{rIMSE}(\beta_1(s, t))$ | 2        | $G : 30 \rightarrow 60$                    | 0.60 | 0.52 | 0.55     |
| $\text{rIMSE}(\beta_1(s, t))$ | 3        | $G : 30 \rightarrow 60$                    | 0.62 | 0.54 | 0.58     |
| $\text{rIMSE}(\beta_1(s, t))$ | 4        | $G : 30 \rightarrow 60$                    | 0.58 | 0.50 | 0.54     |
| $\text{rIMSE}(\beta_1(s, t))$ | 2        | $\text{SNR}_B : 0.2 \rightarrow 1$         | 0.12 | 0.10 | 0.11     |
| $\text{rIMSE}(\beta_1(s, t))$ | 3        | $\text{SNR}_B : 0.2 \rightarrow 1$         | 0.12 | 0.10 | 0.11     |
| $\text{rIMSE}(\beta_1(s, t))$ | 4        | $\text{SNR}_B : 0.2 \rightarrow 1$         | 0.14 | 0.12 | 0.13     |
| $\text{rIMSE}(\beta_1(s, t))$ | 2        | $\text{SNR}_B : 0.2 \rightarrow 5$         | 0.06 | 0.05 | 0.05     |
| $\text{rIMSE}(\beta_1(s, t))$ | 3        | $\text{SNR}_B : 0.2 \rightarrow 5$         | 0.06 | 0.05 | 0.06     |
| $\text{rIMSE}(\beta_1(s, t))$ | 4        | $\text{SNR}_B : 0.2 \rightarrow 5$         | 0.07 | 0.06 | 0.07     |
| $\text{rIMSE}(\beta_1(s, t))$ | 2        | $\text{SNR}_\varepsilon : 1 \rightarrow 5$ | 0.07 | 0.06 | 0.06     |
| $\text{rIMSE}(\beta_1(s, t))$ | 3        | $\text{SNR}_\varepsilon : 1 \rightarrow 5$ | 0.07 | 0.06 | 0.07     |
| $\text{rIMSE}(\beta_1(s, t))$ | 4        | $\text{SNR}_\varepsilon : 1 \rightarrow 5$ | 0.07 | 0.06 | 0.07     |

**Table 4:** Exponentiated coefficient estimates (i.e., multiplication factors) for the  $\log_2$ -linear models for  $\text{rIMSE}(\int x_1(s)\beta_1(s, t)ds)$ . “High” and “low” estimates are estimated coefficients  $\pm 2$  standard deviations, exponentiated.

|                               | scenario | setting                                    | high | low  | estimate |
|-------------------------------|----------|--------------------------------------------|------|------|----------|
| $\text{rIMSE}(\beta_2(s, t))$ | 3        | baseline                                   | 1.07 | 0.89 | 0.97     |
| $\text{rIMSE}(\beta_2(s, t))$ | 3        | $M : 10 \rightarrow 100$                   | 0.14 | 0.12 | 0.13     |
| $\text{rIMSE}(\beta_2(s, t))$ | 3        | $n_i : 3 \rightarrow 20$                   | 0.16 | 0.14 | 0.15     |
| $\text{rIMSE}(\beta_2(s, t))$ | 3        | $G : 30 \rightarrow 60$                    | 0.62 | 0.54 | 0.58     |
| $\text{rIMSE}(\beta_2(s, t))$ | 3        | $\text{SNR}_B : 0.2 \rightarrow 1$         | 0.12 | 0.10 | 0.11     |
| $\text{rIMSE}(\beta_2(s, t))$ | 3        | $\text{SNR}_B : 0.2 \rightarrow 5$         | 0.07 | 0.06 | 0.06     |
| $\text{rIMSE}(\beta_2(s, t))$ | 3        | $\text{SNR}_\varepsilon : 1 \rightarrow 5$ | 0.07 | 0.06 | 0.07     |

**Table 5:** Exponentiated coefficient estimates (i.e., multiplication factors) for the  $\log_2$ -linear models for  $\text{rIMSE}(\int x_2(s)\beta_2(s, t)ds)$ . “High” and “low” estimates are estimated coefficients  $\pm 2$  standard deviations, exponentiated.



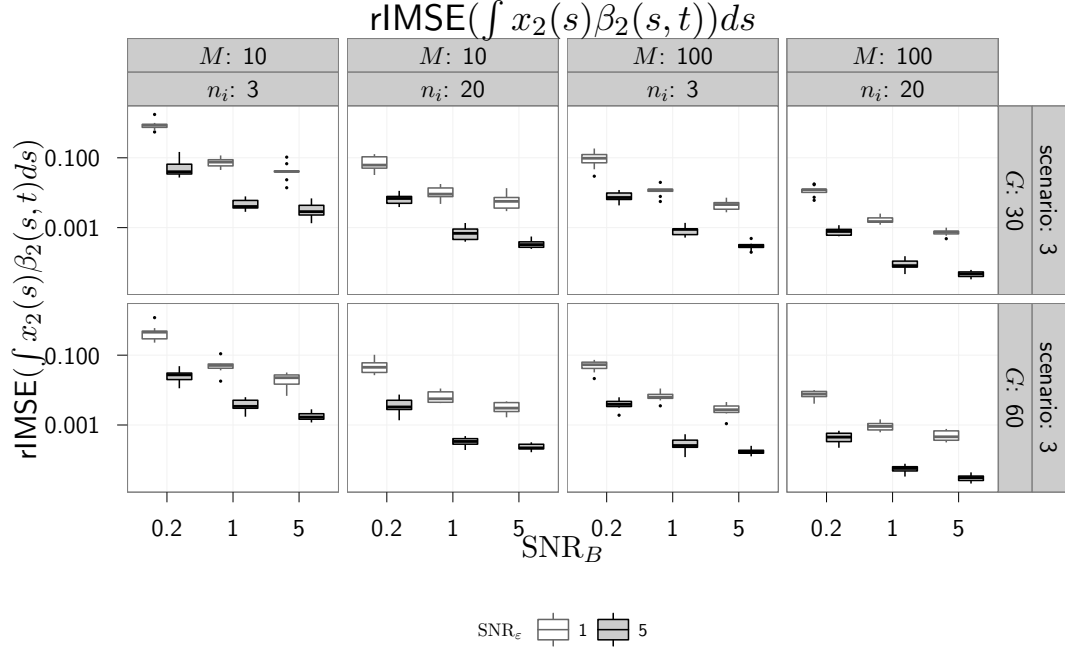

**Figure 6:** rIMSE for  $\int x_2(s)\hat{\beta}_2(s,t)ds$  for all combinations of the various settings.

|                                | scenario | setting                                 | high | low  | estimate |
|--------------------------------|----------|-----------------------------------------|------|------|----------|
| $\text{rIMSE}(\delta_2(t)z_2)$ | 4        | baseline                                | 2.23 | 1.57 | 1.87     |
| $\text{rIMSE}(\delta_2(t)z_2)$ | 4        | $M : 10 \rightarrow 100$                | 0.12 | 0.09 | 0.11     |
| $\text{rIMSE}(\delta_2(t)z_2)$ | 4        | $n_i : 3 \rightarrow 20$                | 0.16 | 0.12 | 0.14     |
| $\text{rIMSE}(\delta_2(t)z_2)$ | 4        | $G : 30 \rightarrow 60$                 | 0.63 | 0.49 | 0.55     |
| $\text{rIMSE}(\delta_2(t)z_2)$ | 4        | $\text{SNR}_B : 0.2 \rightarrow 1$      | 0.13 | 0.09 | 0.11     |
| $\text{rIMSE}(\delta_2(t)z_2)$ | 4        | $\text{SNR}_B : 0.2 \rightarrow 5$      | 0.07 | 0.05 | 0.06     |
| $\text{rIMSE}(\delta_2(t)z_2)$ | 4        | $\text{SNR}_\epsilon : 1 \rightarrow 5$ | 0.08 | 0.06 | 0.07     |

**Table 7:** Exponentiated coefficient estimates (i.e., multiplication factors) for the log<sub>2</sub>-linear models for  $\text{rIMSE}(\delta_2(t)z_2)$ . “High” and “low” estimates are estimated coefficients  $\pm 2$  standard deviations, exponentiated.

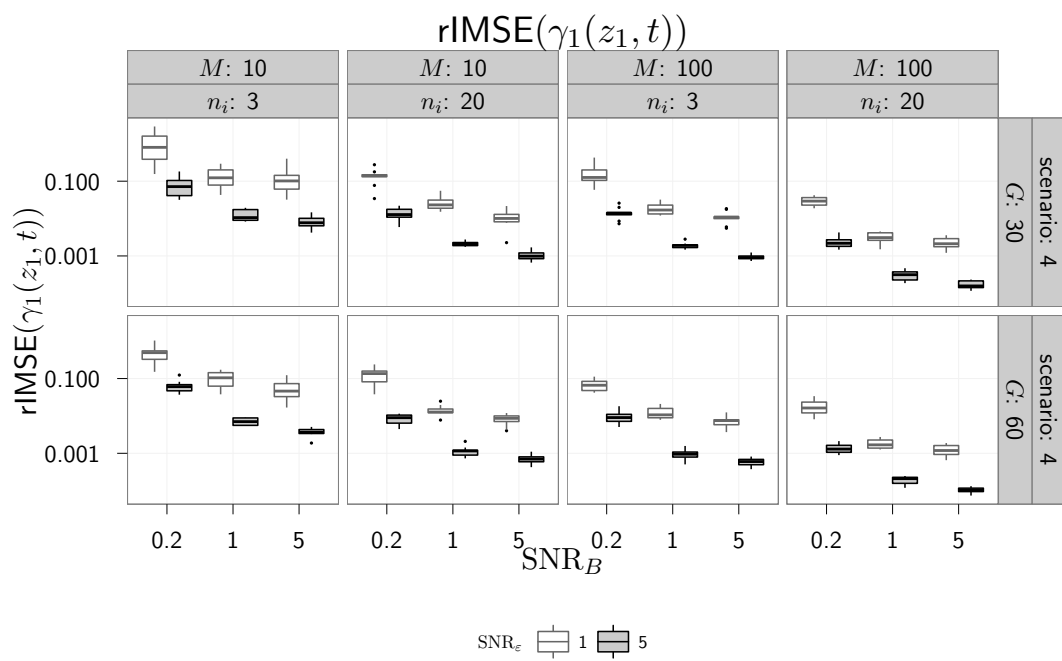

**Figure 7:** rIMSE for  $\hat{\gamma}_1(z_1, t)$  for all combinations of the various settings.



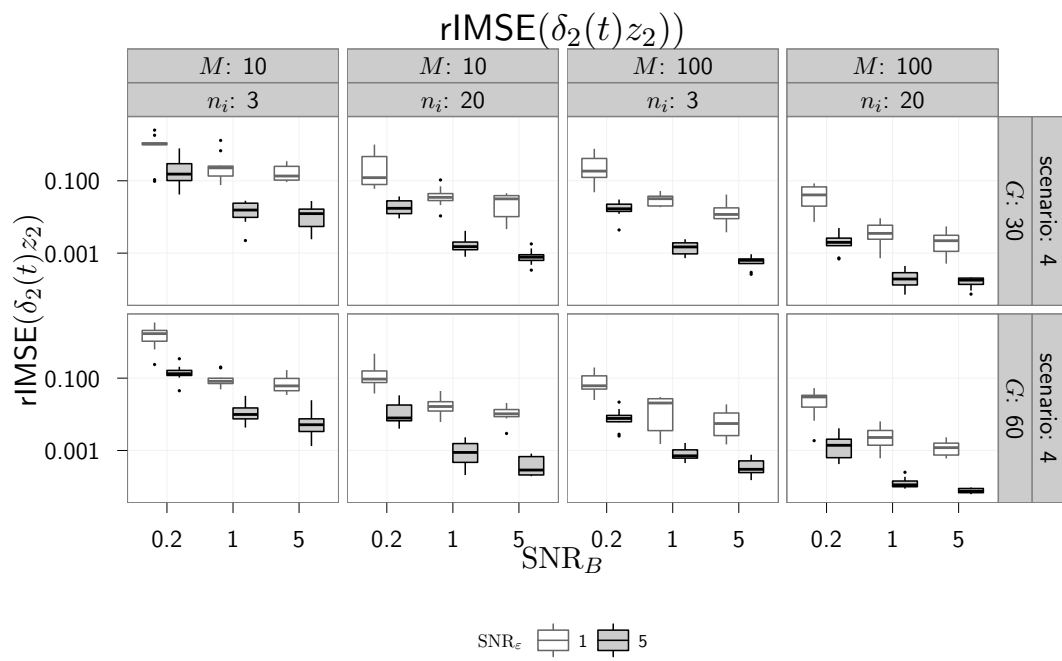

**Figure 8:** rIMSE for  $\hat{\delta}_2(t)z_2$  for all combinations of the various settings.



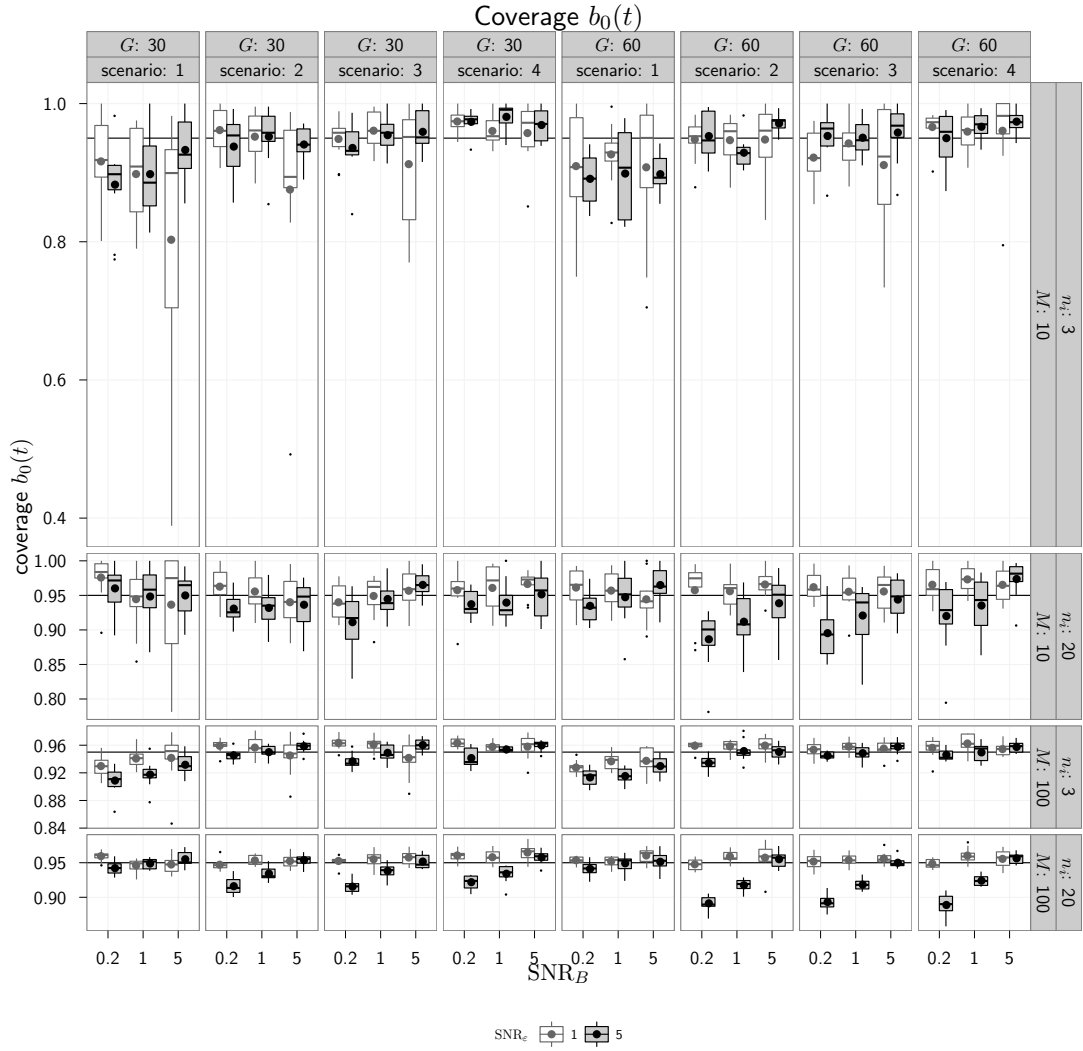

**Figure 10:** Coverage for  $b_0(t)$  for all combinations of the various settings for nominal approximate 95% CIs. Dots denote mean coverage.

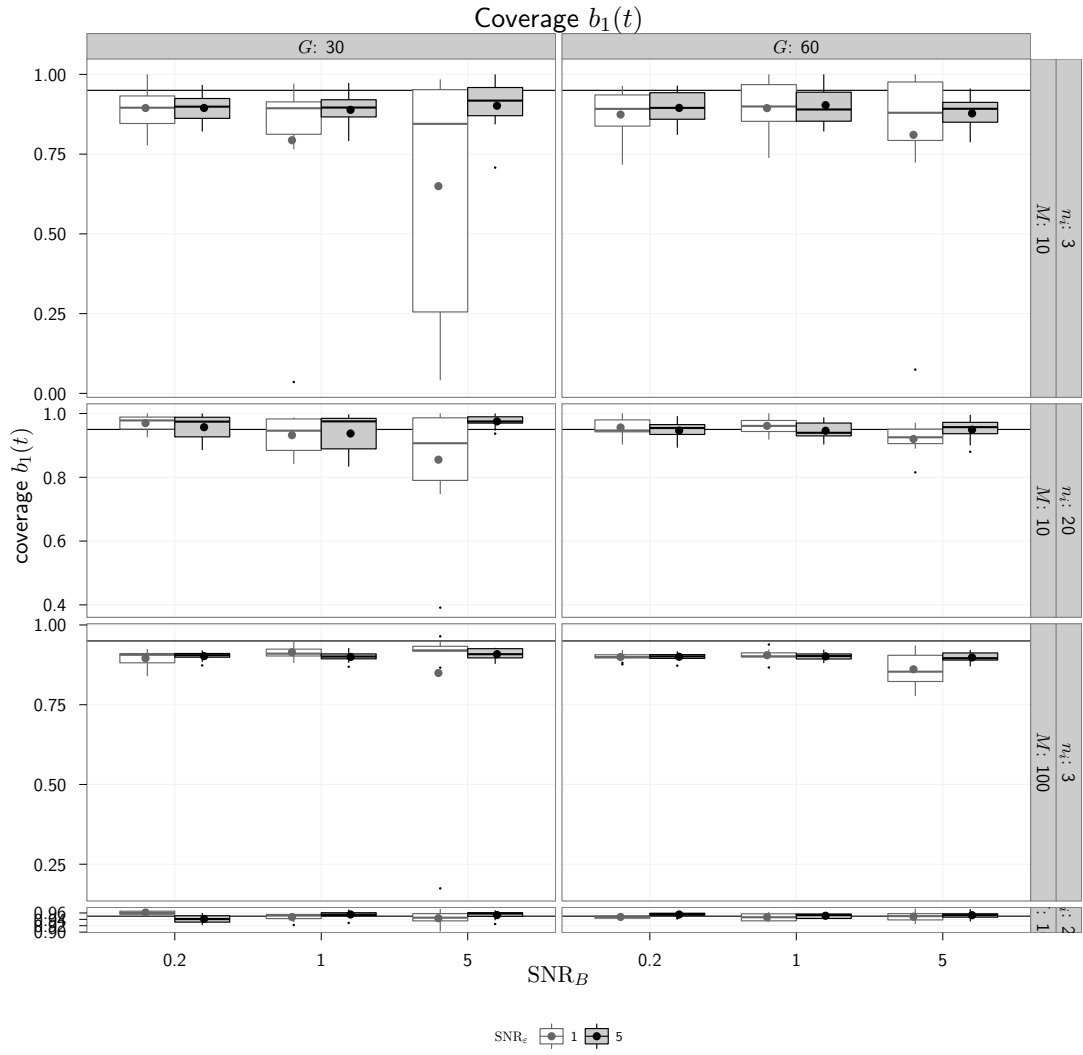

**Figure 11:** Coverage for  $b_1(t)$  for all combinations of the various settings for nominal approximate 95% CIs. Dots denote mean coverage.

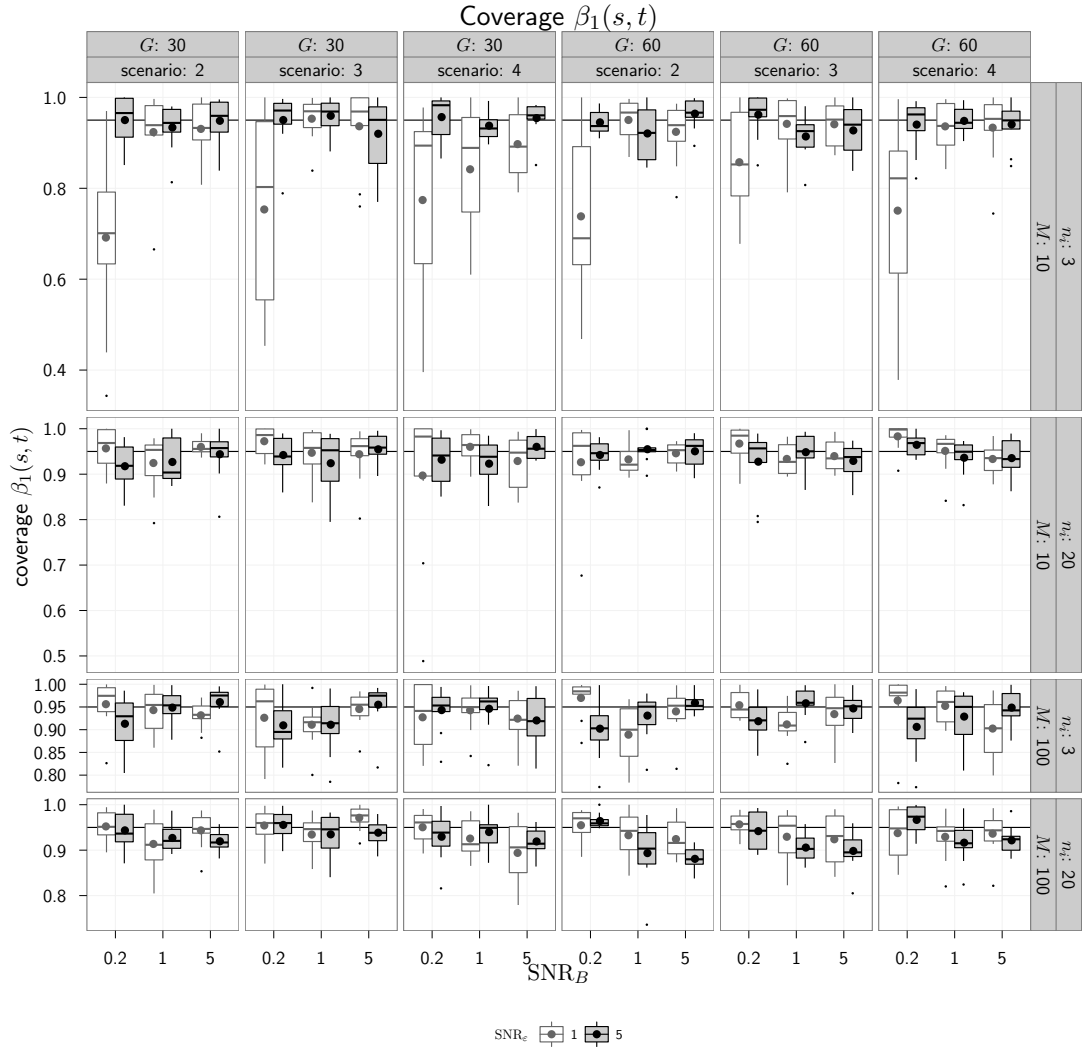

**Figure 12:** Coverage for effect of  $x_1(s)$  for all combinations of the various settings for nominal approximate 95% CIs. Dots denote mean coverage.

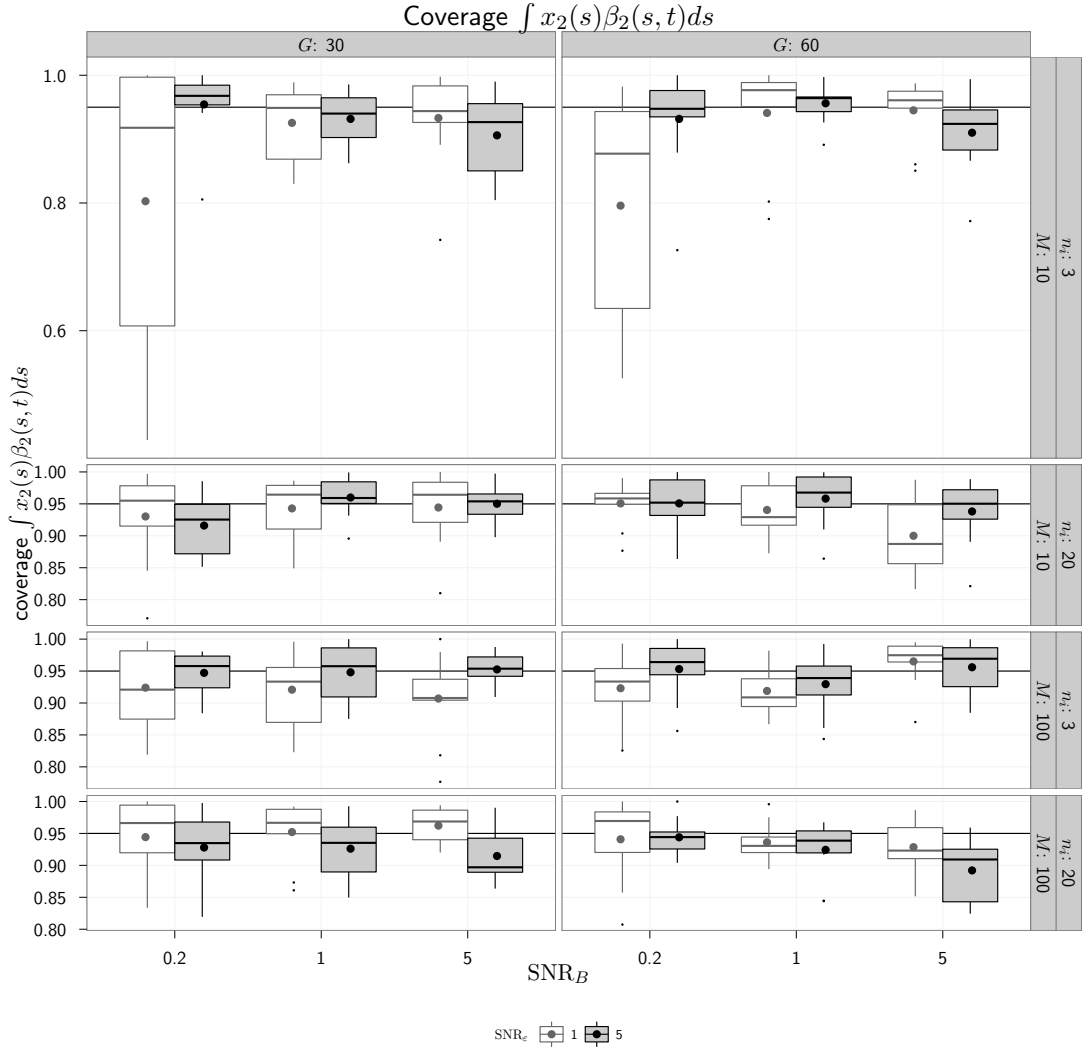

**Figure 13:** Coverage for effect of  $x_2(s)$  for all combinations of the various settings for nominal approximate 95% CIs. Dots denote mean coverage.

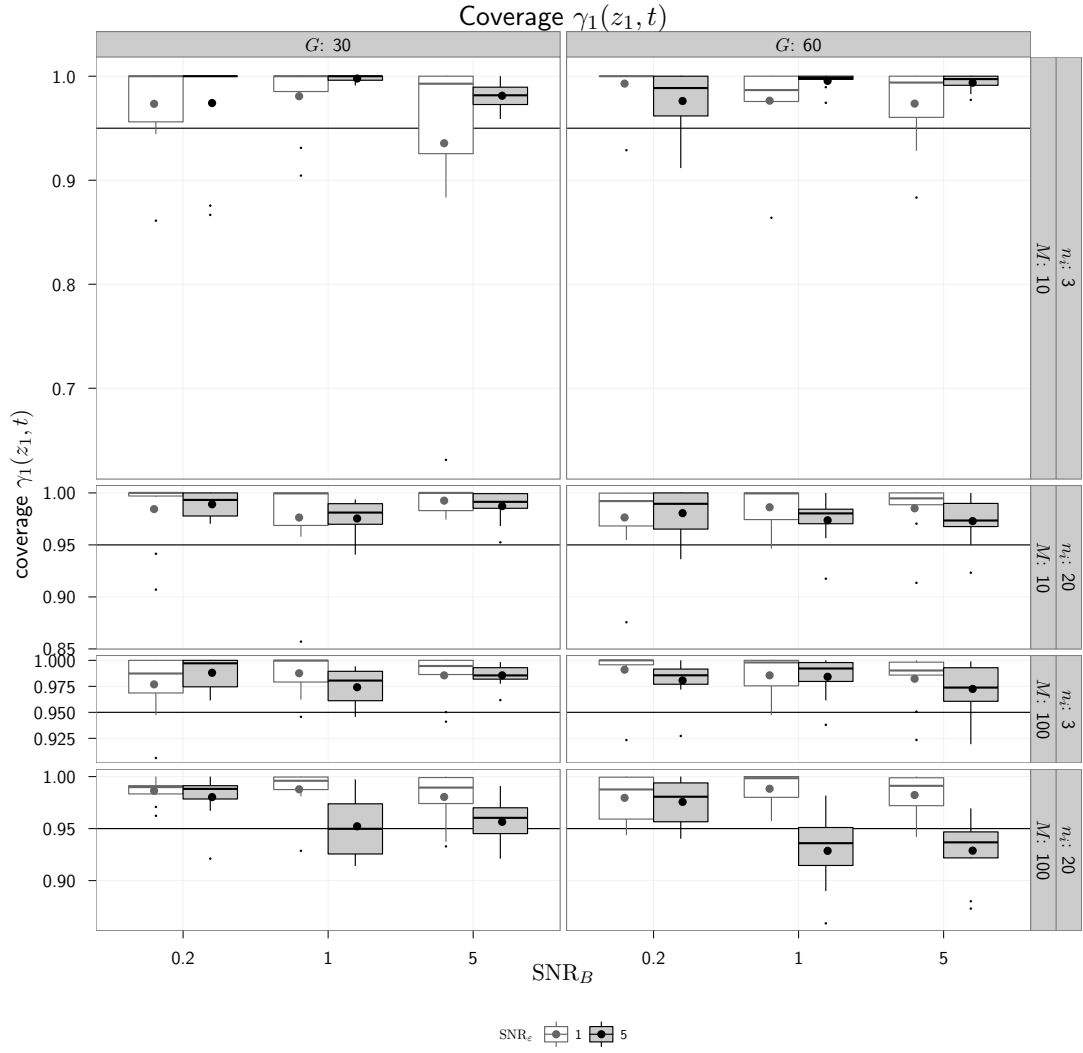

**Figure 14:** Coverage for  $\gamma_1(z_1, t)$  for all combinations of the various settings for nominal approximate 95% CIs. Dots denote mean coverage.

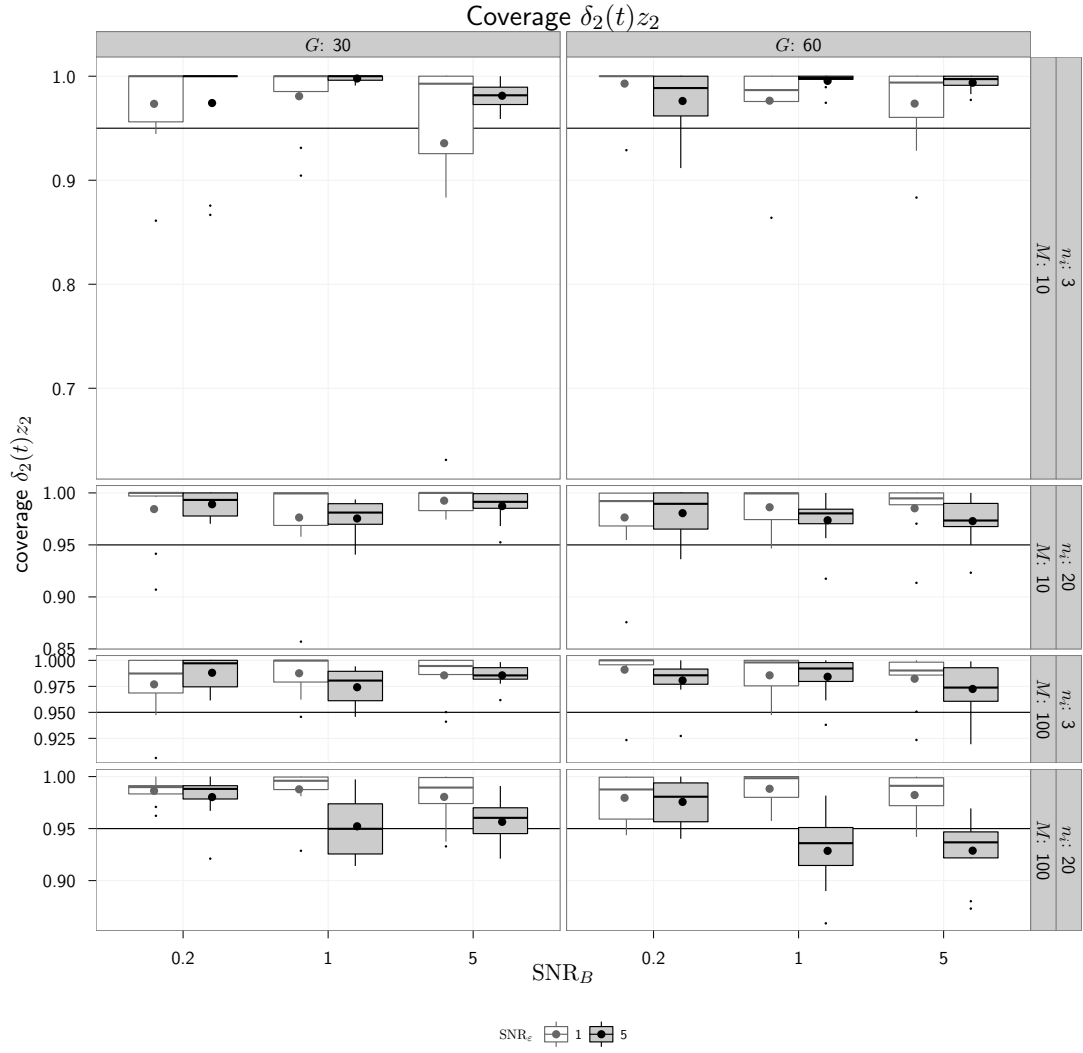

**Figure 15:** Coverage for  $z_2\delta_2(t)$  for all combinations of the various settings for nominal approximate 95% CIs. Dots denote mean coverage.



65 **B.4 Comparison to FPC-based approaches**

66 The following graphs show the IMSEs for the PCA-based approaches tested for scenario 2, i.e. a  
 67 model with an FPC-based function-on-function term and a model with FPC-based functional random  
 68 intercepts.

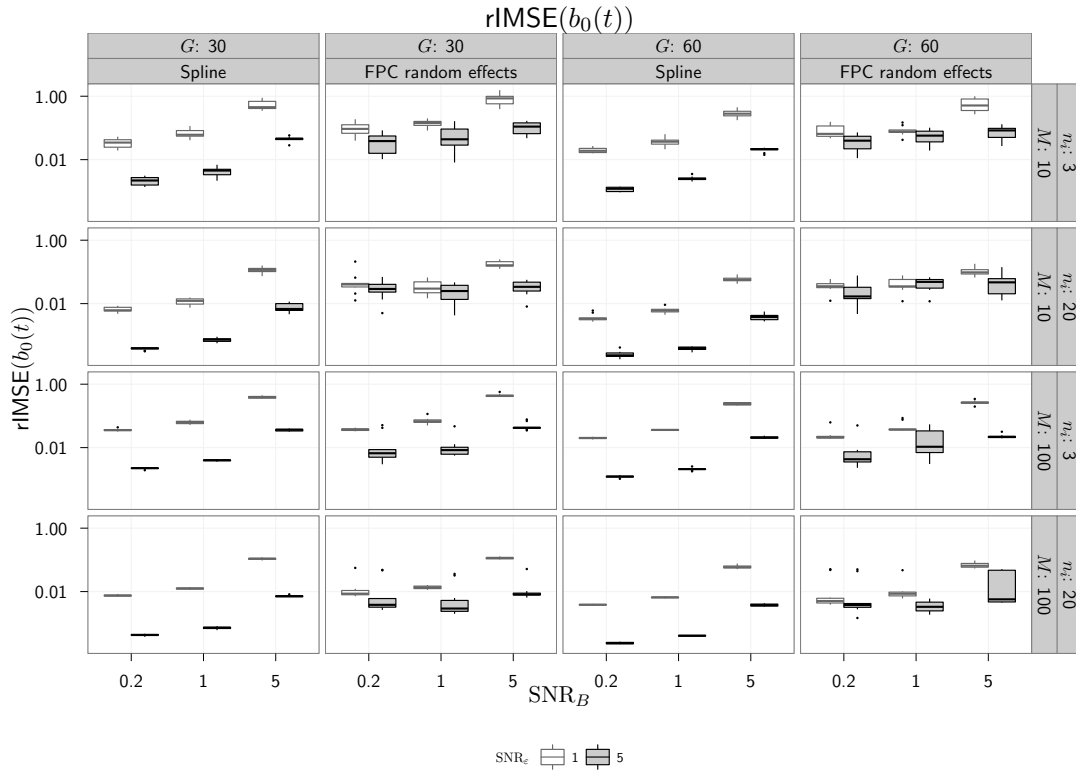

**Figure 16:** rIMSE for  $b_0(t)$  for spline-based and FPC-based random effects in scenario 2.

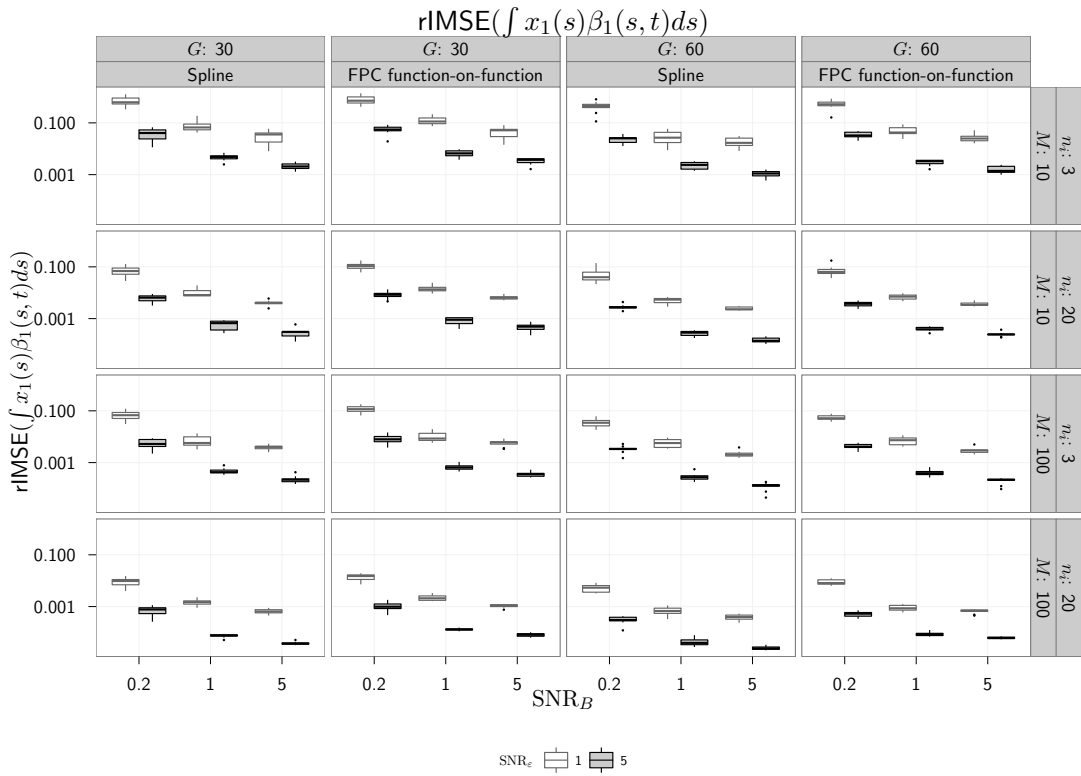

Figure 17: rMSE for  $\int x_1(s)\beta_1(s,t)ds$  for spline-based and FPC-based estimates in scenario 2.

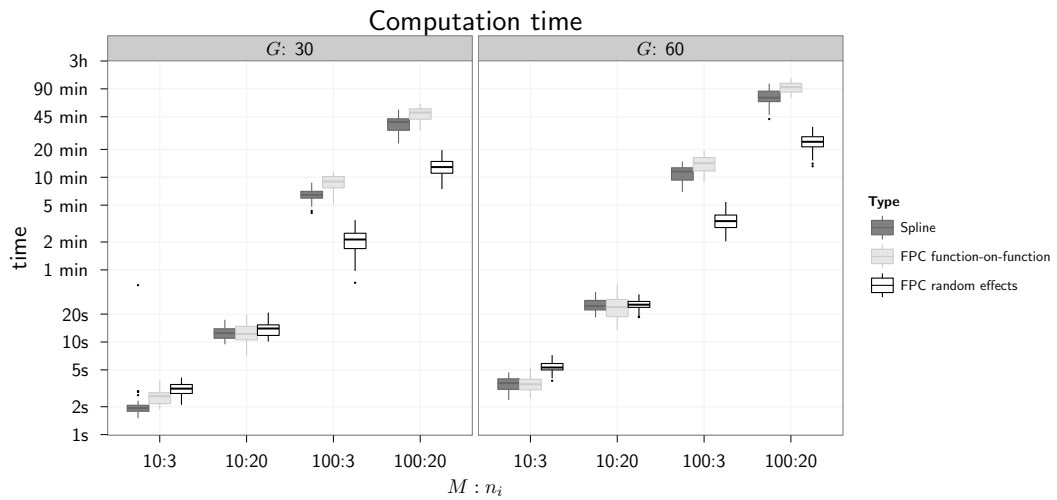

Figure 18: Computation times for spline-based and FPC-based fits in scenario 2.

## 69 **B.5 Exemplary data sets and fits**

70 For each scenario, we present the setting and replication with rIMSE values closest to the median  
71 rIMSE values, followed by those with minimal and maximal rIMSE values across the various  
72 combinations of  $n_i$ ,  $M$ ,  $G$ ,  $\text{SNR}_B$  and  $\text{SNR}_\epsilon$ . For all plots, the left column shows the observed or  
73 true quantities, while the right column shows their estimates. The bottom row displays the observed  
74 functional responses on the left and the estimated residual curves on the right, note that they are  
75 on different vertical scales. Trajectories are colour-coded for subject. For larger data sets, only a  
76 sample of at most 300 observations is plotted.

### 77 **B.5.1 Scenario 1**

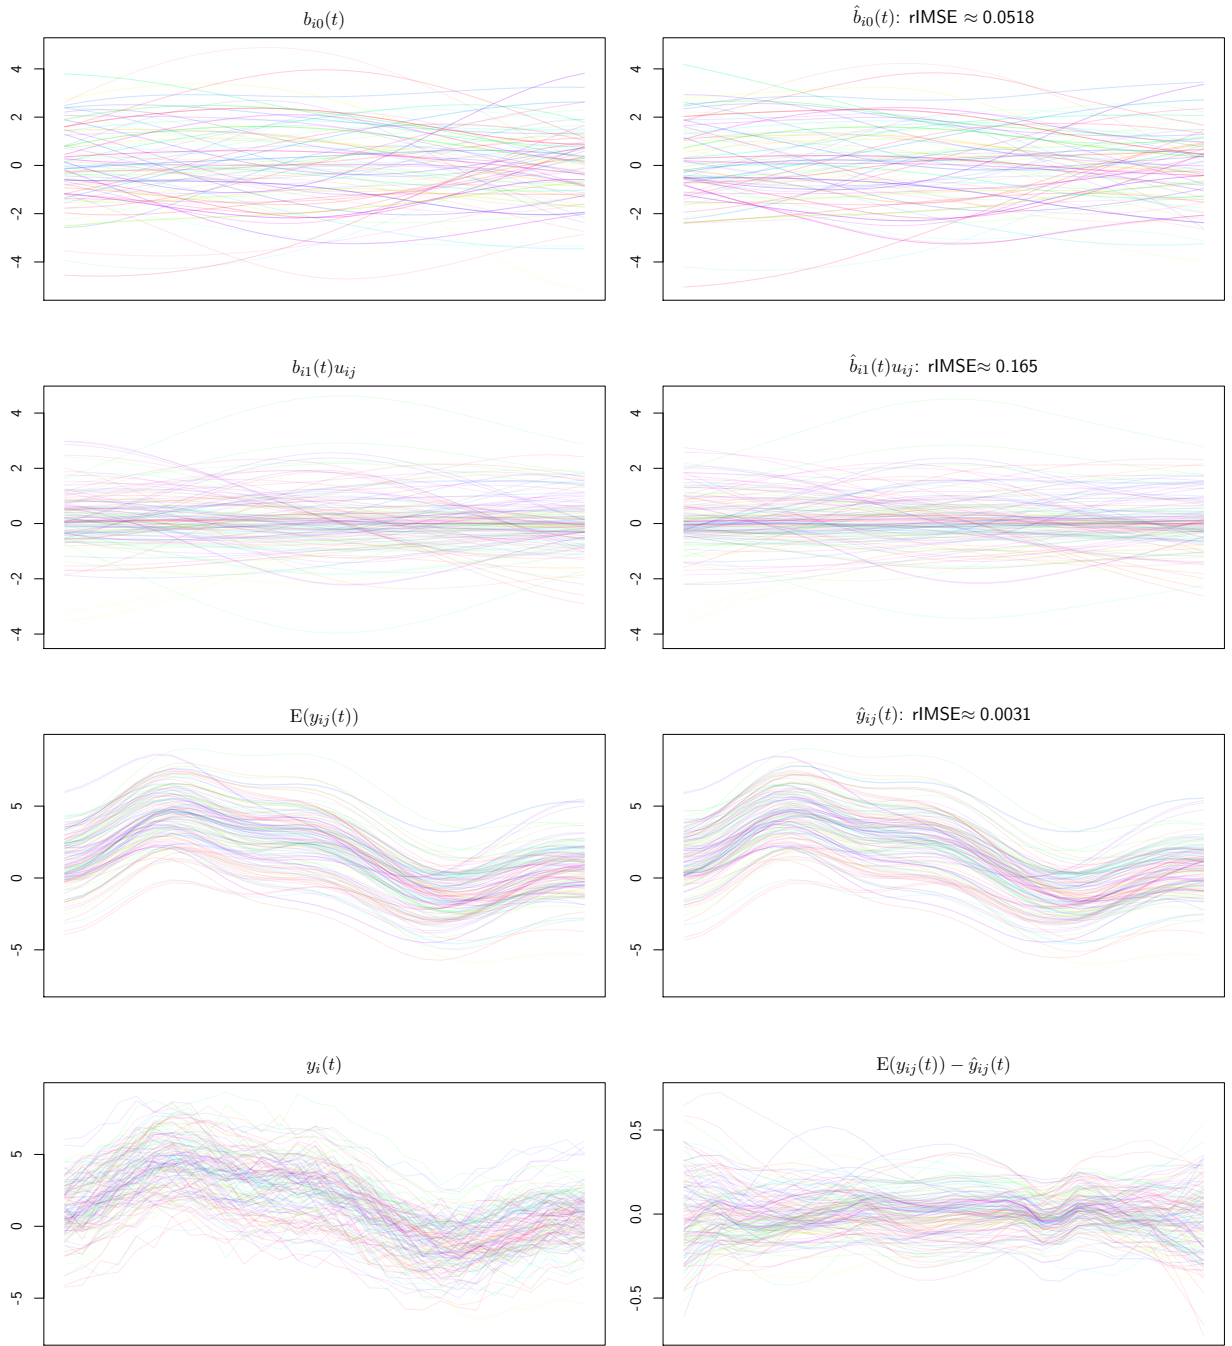

Scenario 1 (median error) :  $M = 100$ ,  $n_i = 3$ ,  $G = 30$ ,  $\text{SNR}_\epsilon = 5$ ,  $\text{SNR}_B = 1$

**Figure 19:** Example of data and fit for scenario 1 with median error.

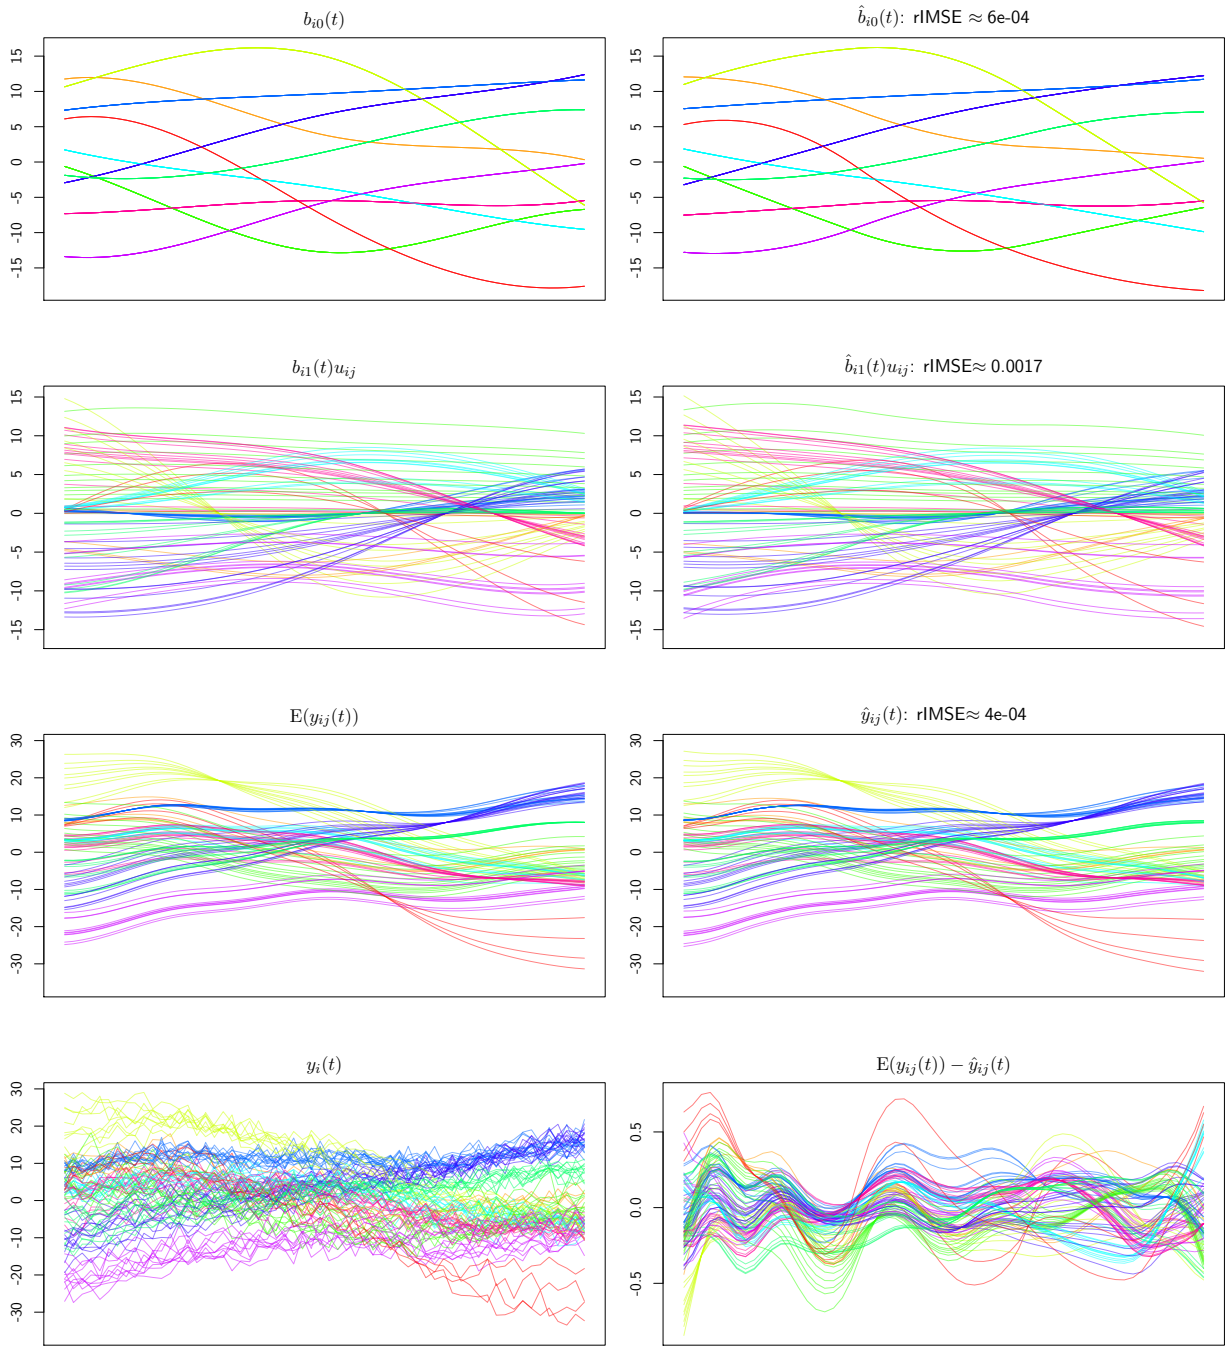

Scenario 1 (minimum error) :  $M = 10$ ,  $n_i = 20$ ,  $G = 60$ ,  $\text{SNR}_\epsilon = 5$ ,  $\text{SNR}_B = 0.2$

**Figure 20:** Example of data and fit for scenario 1 with minimum error.

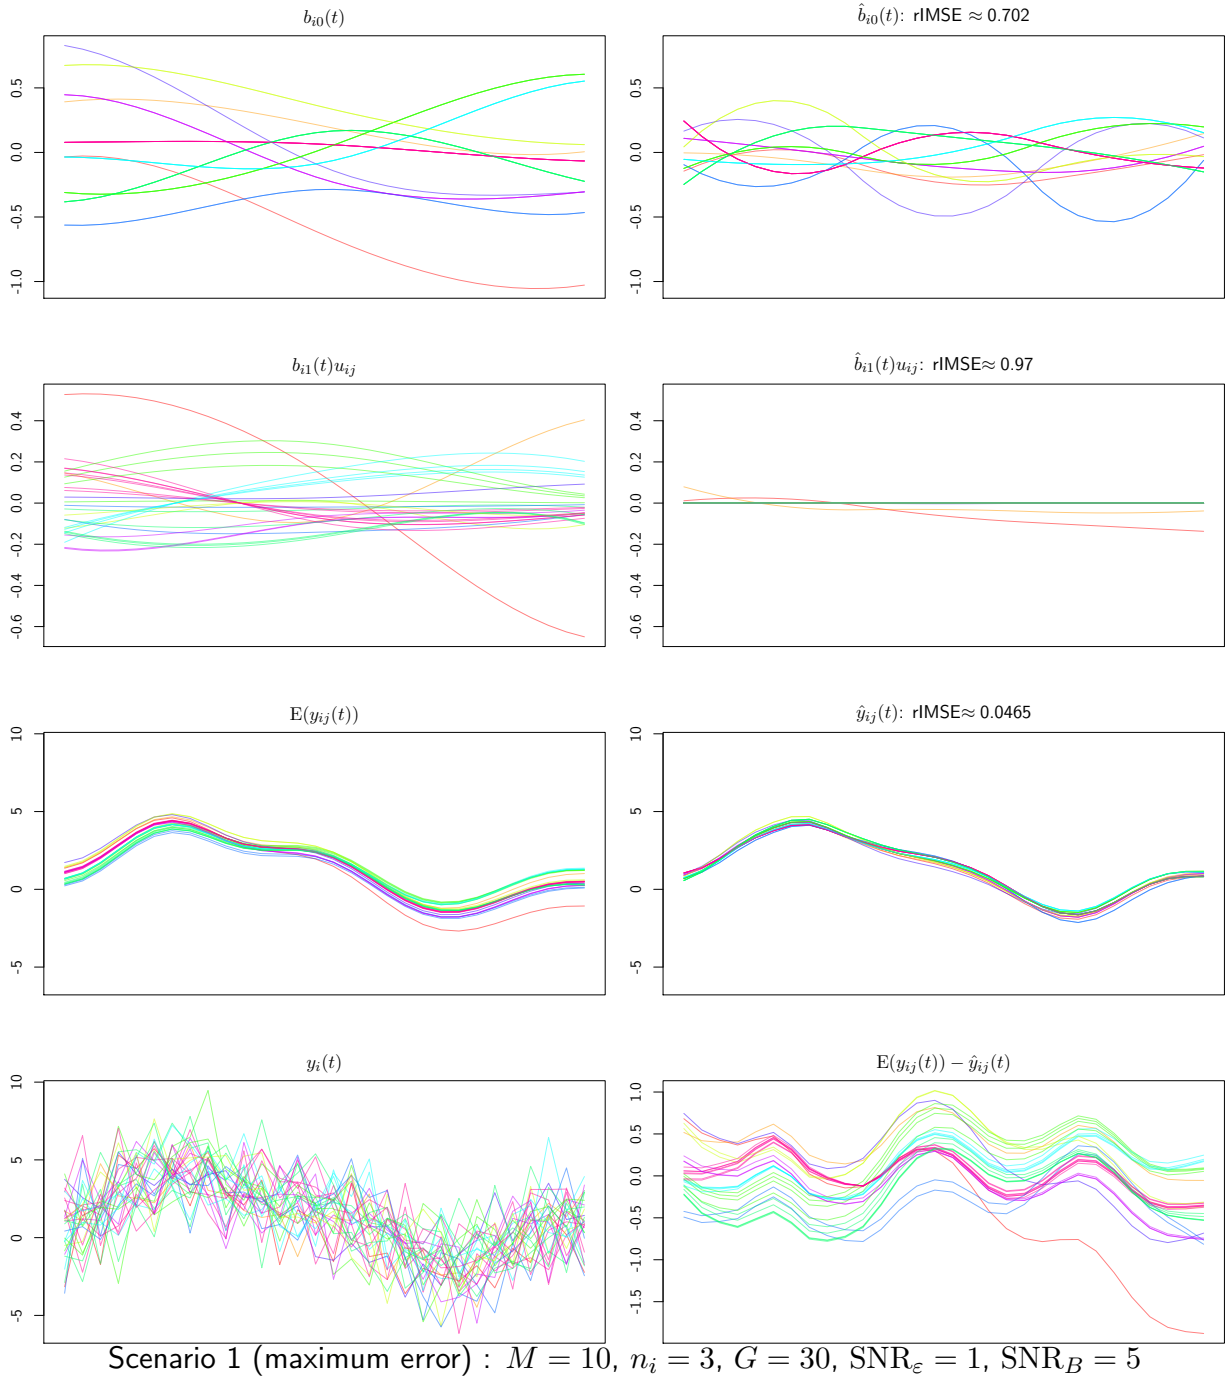

**Figure 21:** Example of data and fit for scenario 1 with maximum error.

78 B.5.2 Scenario 2

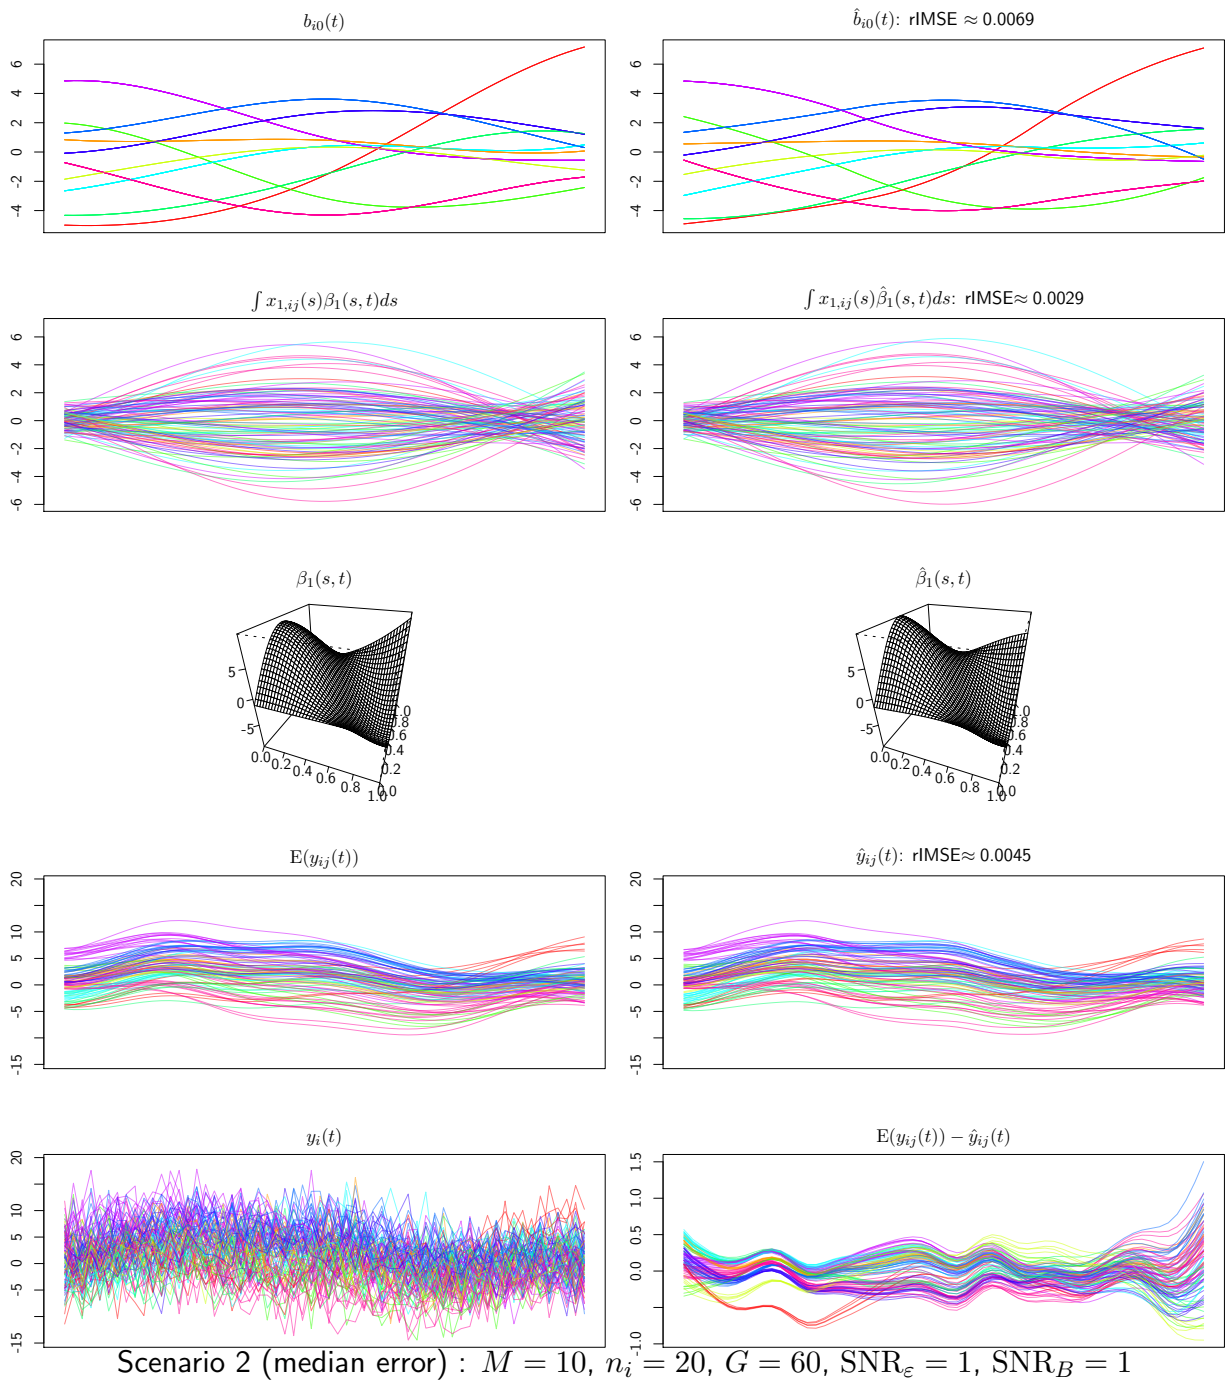

Figure 22: Example of data and fit for scenario 2 with median error.

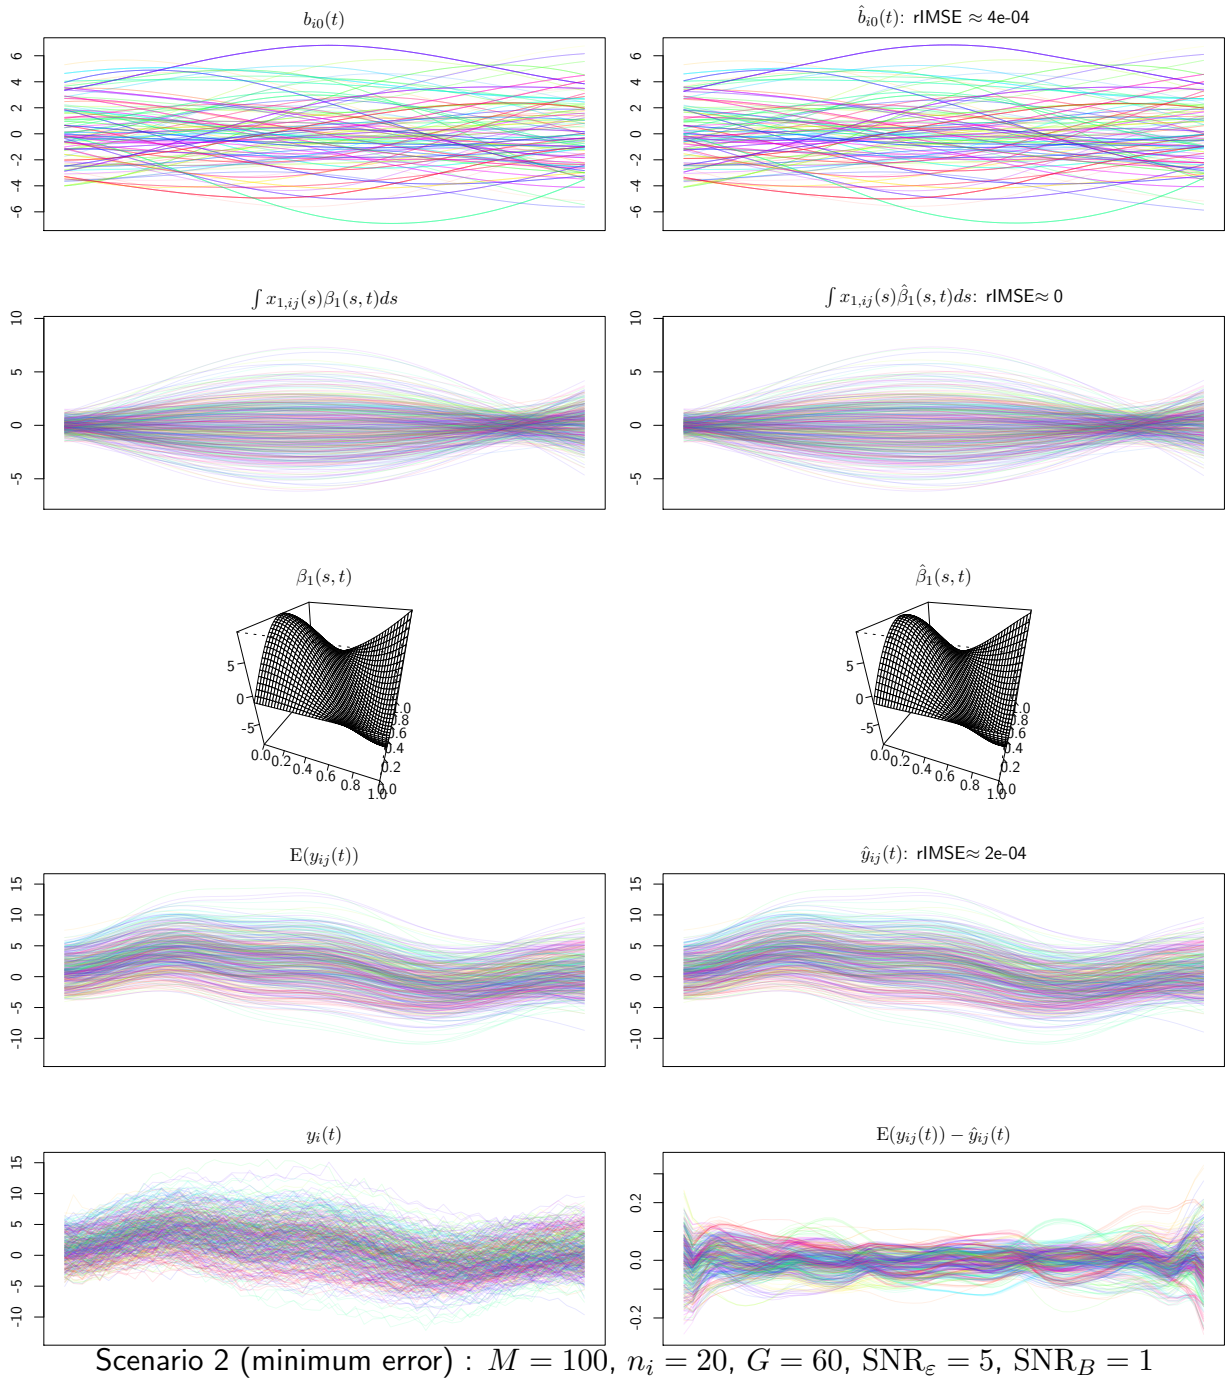

**Figure 23:** Example of data and fit for scenario 2 with minimum error.



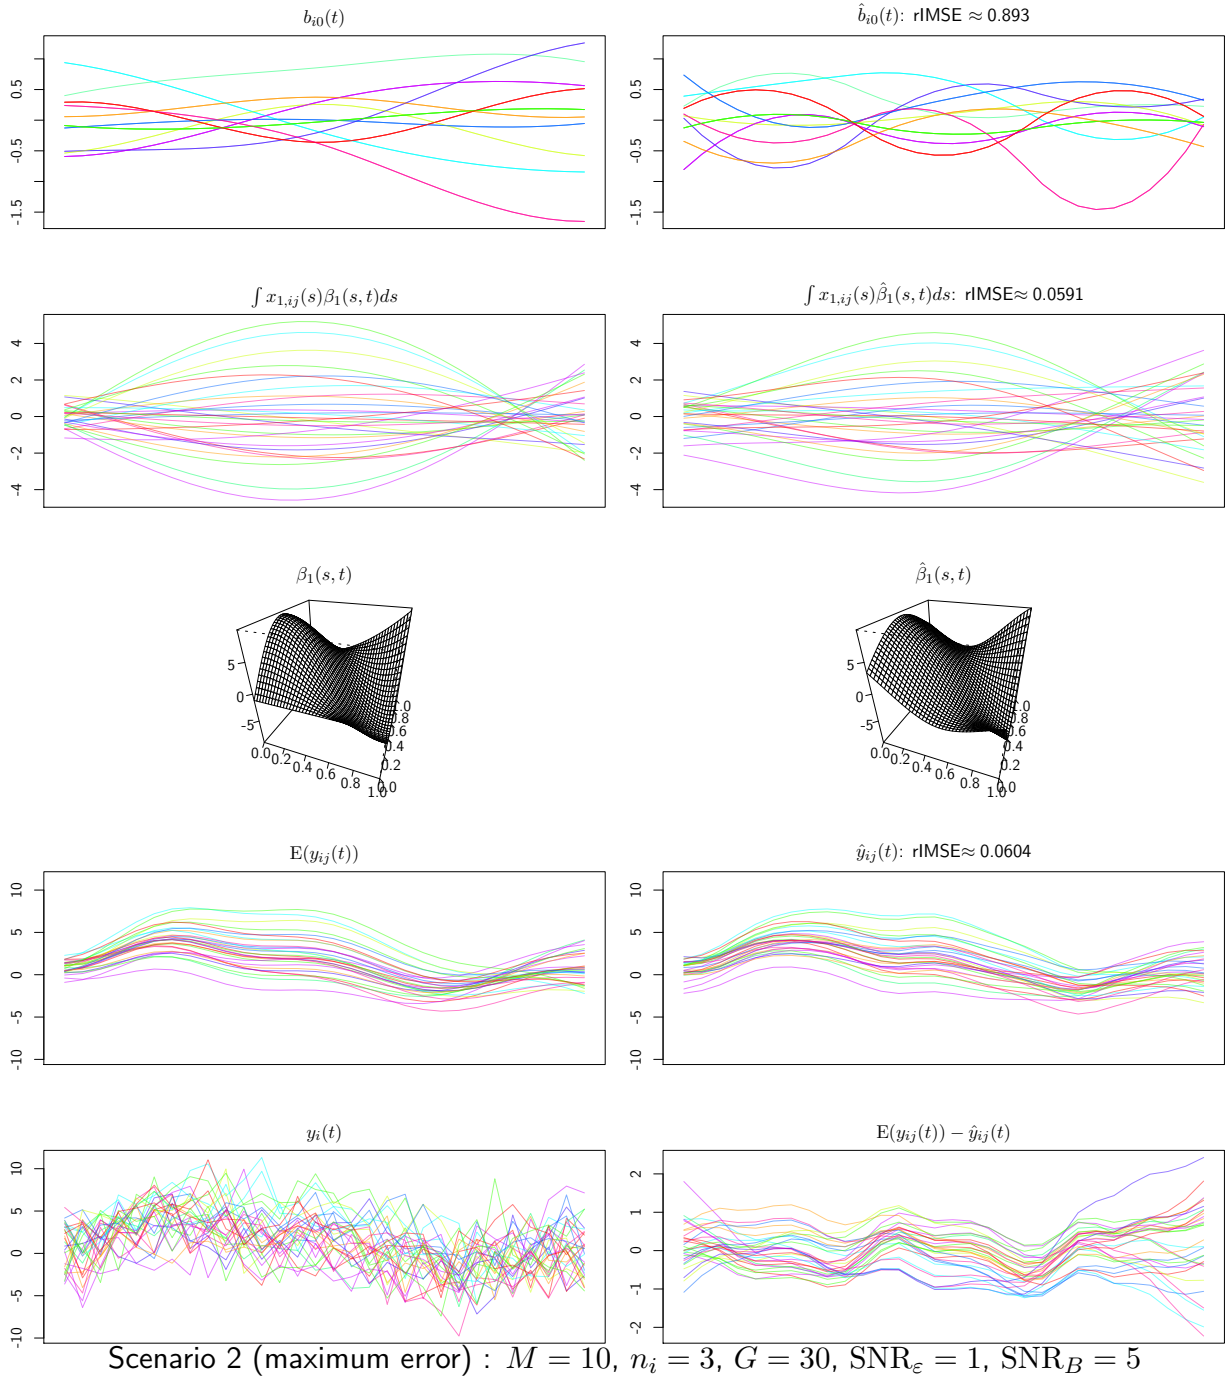

**Figure 24:** Example of data and fit for scenario 2 with maximum error.

79 **B.5.3 Scenario 3**

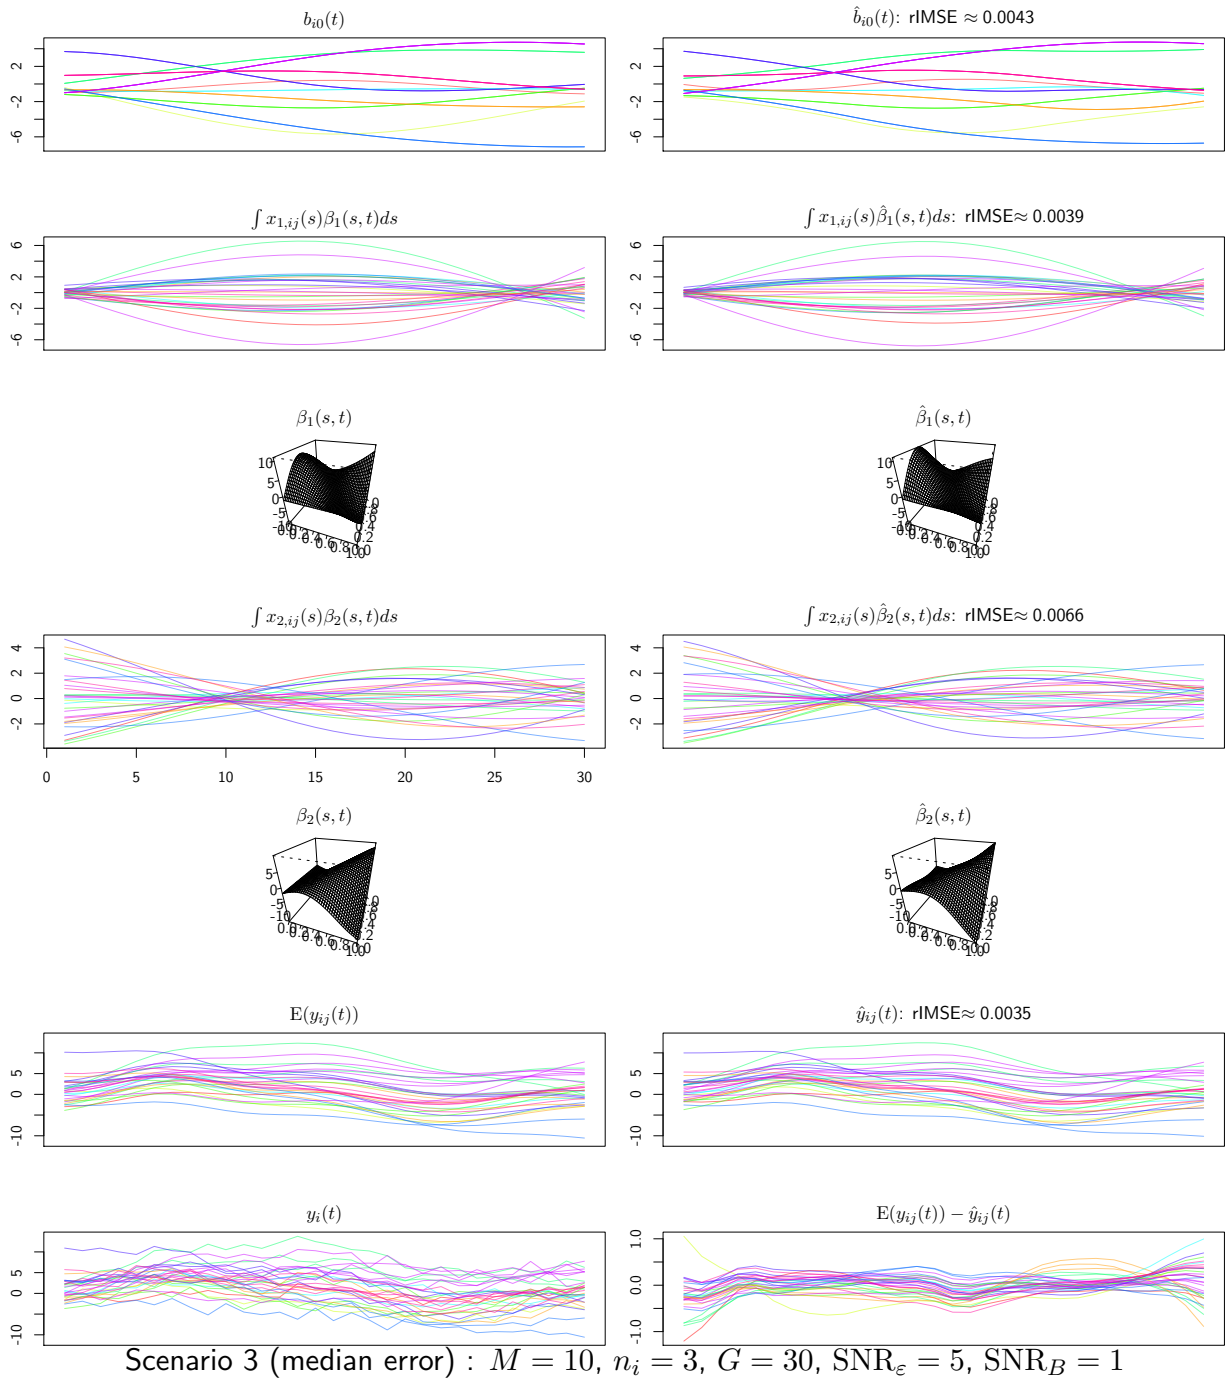

**Figure 25:** Example of data and fit for scenario 3 with median error.

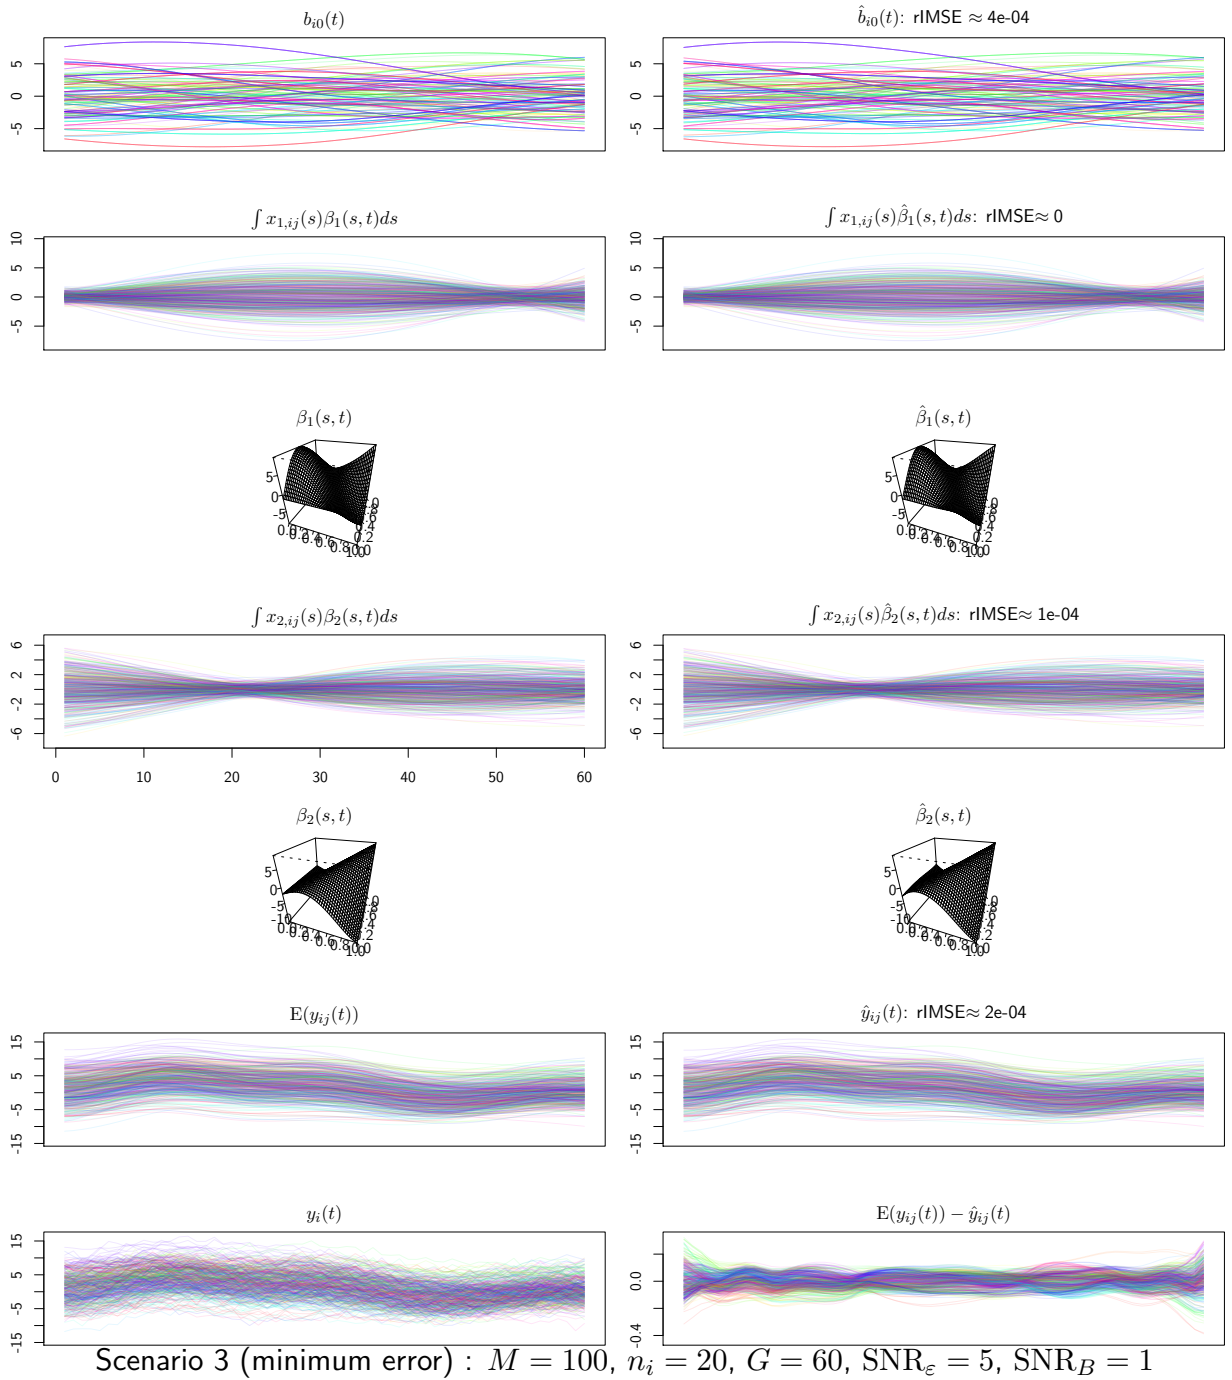

**Figure 26:** Example of data and fit for scenario 3 with minimum error.

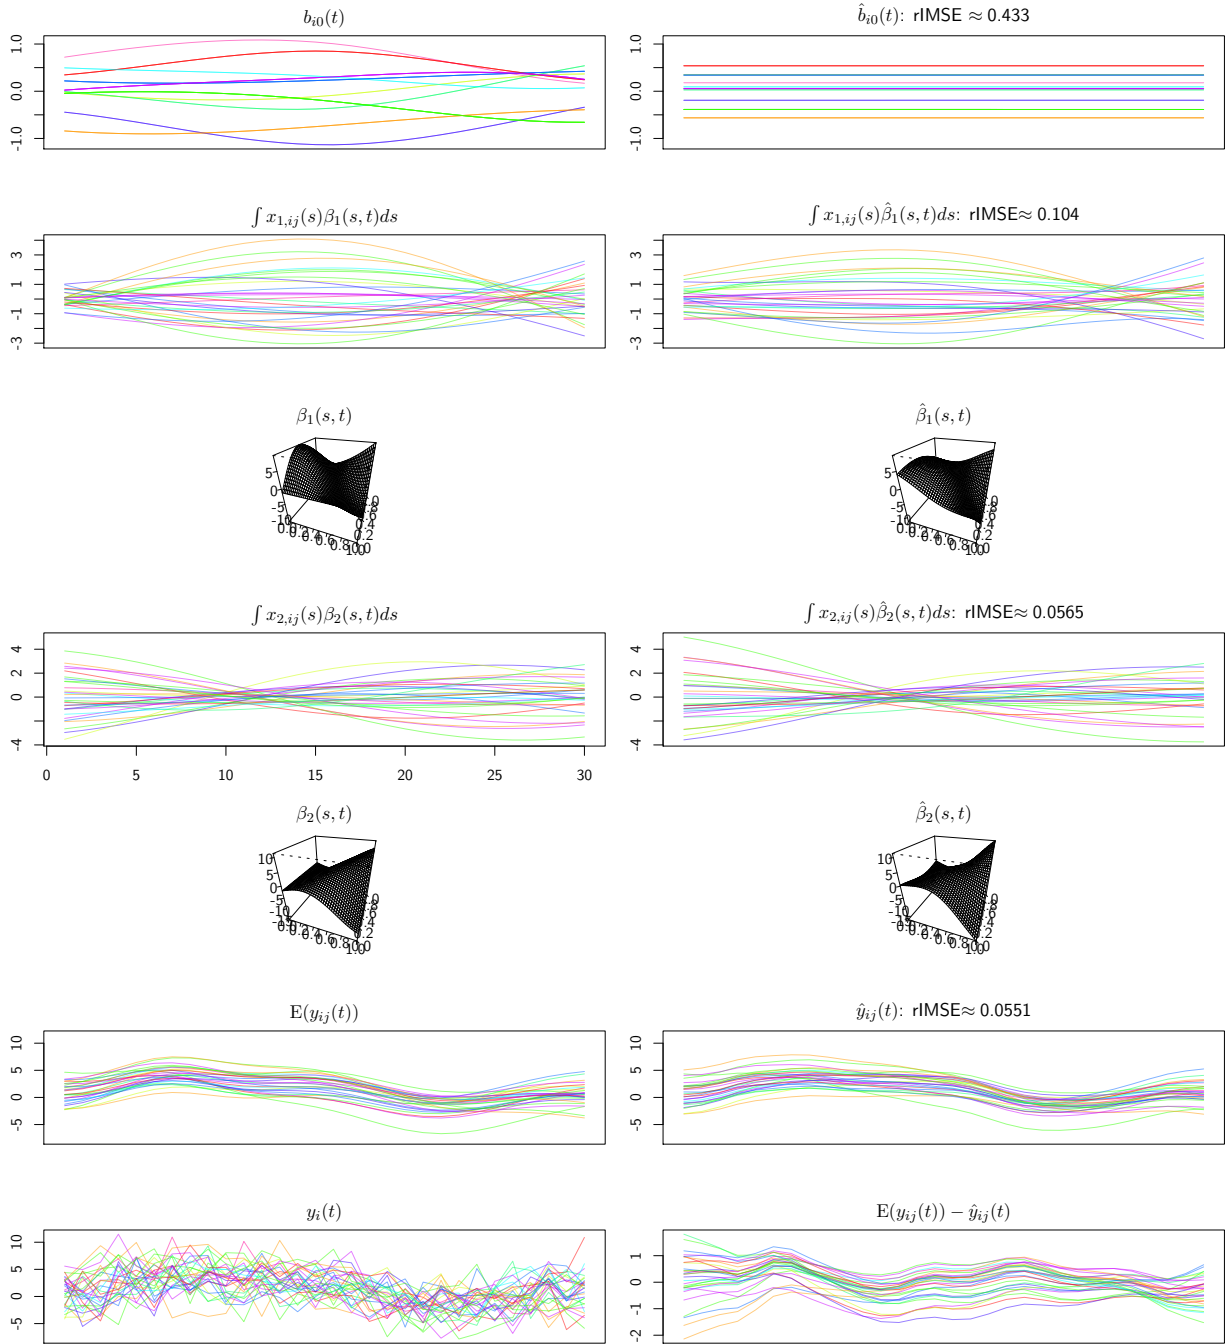

Scenario 3 (maximum error) :  $M = 10$ ,  $n_i = 3$ ,  $G = 30$ ,  $\text{SNR}_\varepsilon = 1$ ,  $\text{SNR}_B = 5$

**Figure 27:** Example of data and fit for scenario 3 with maximum error.

80 B.5.4 Scenario 4

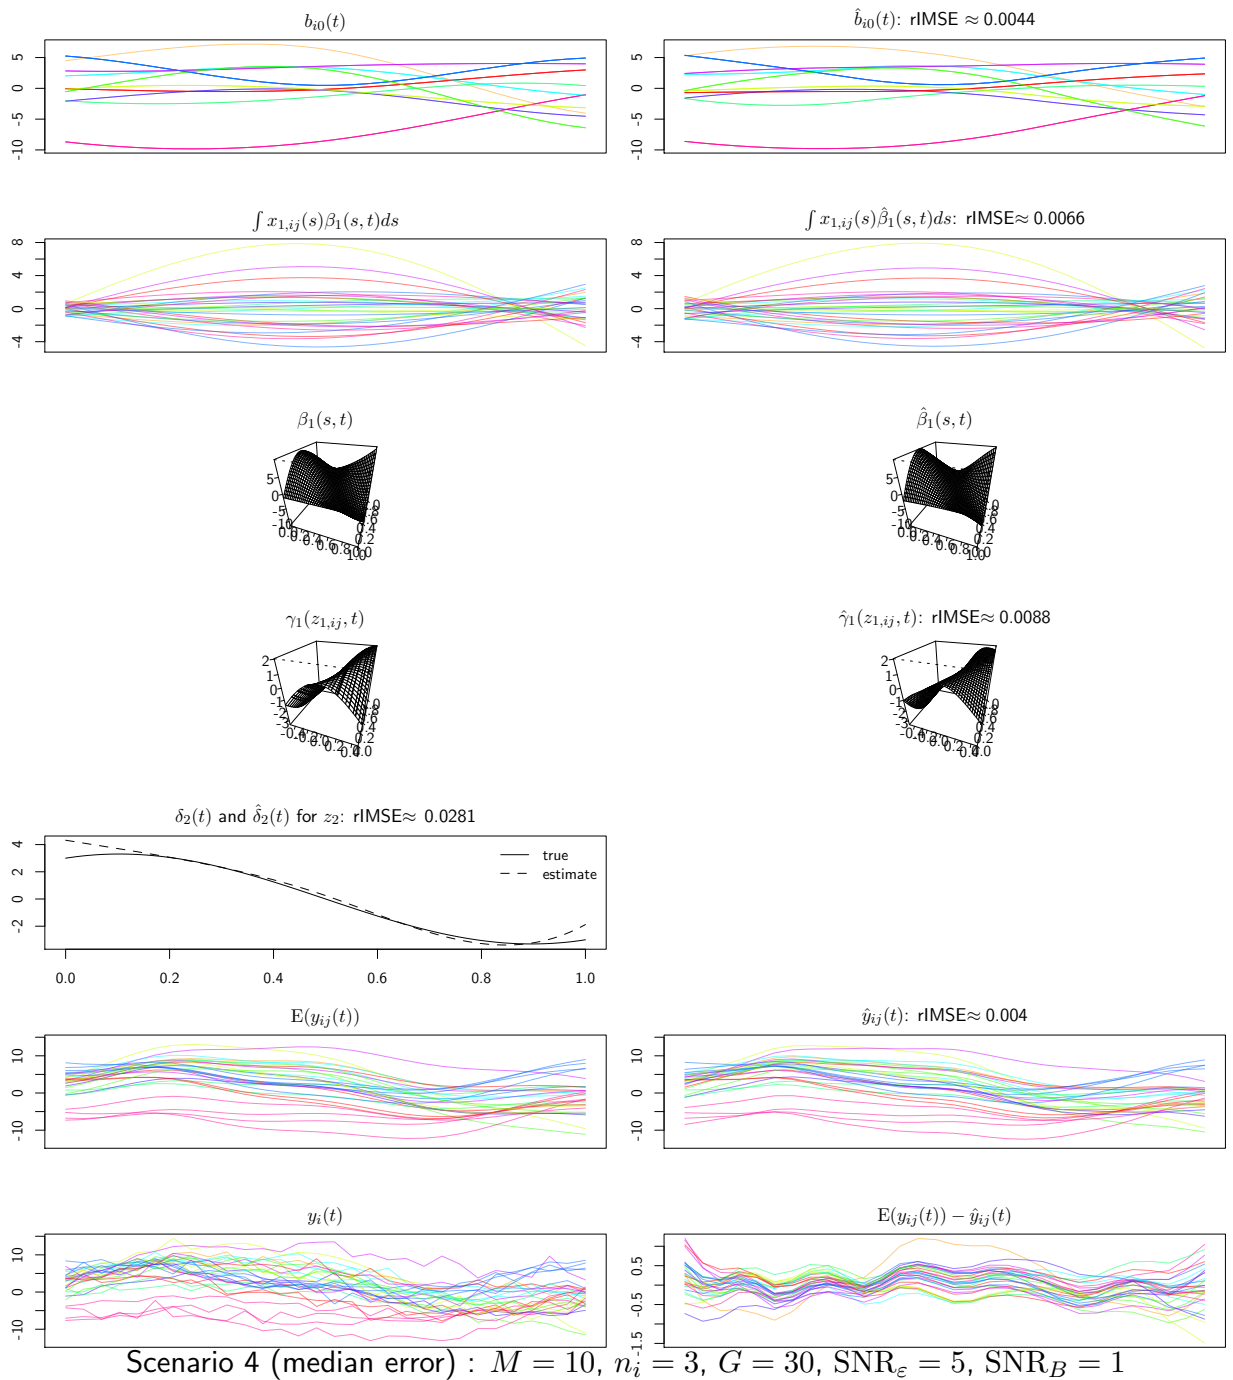

Figure 28: Example of data and fit for scenario 4 with median error.

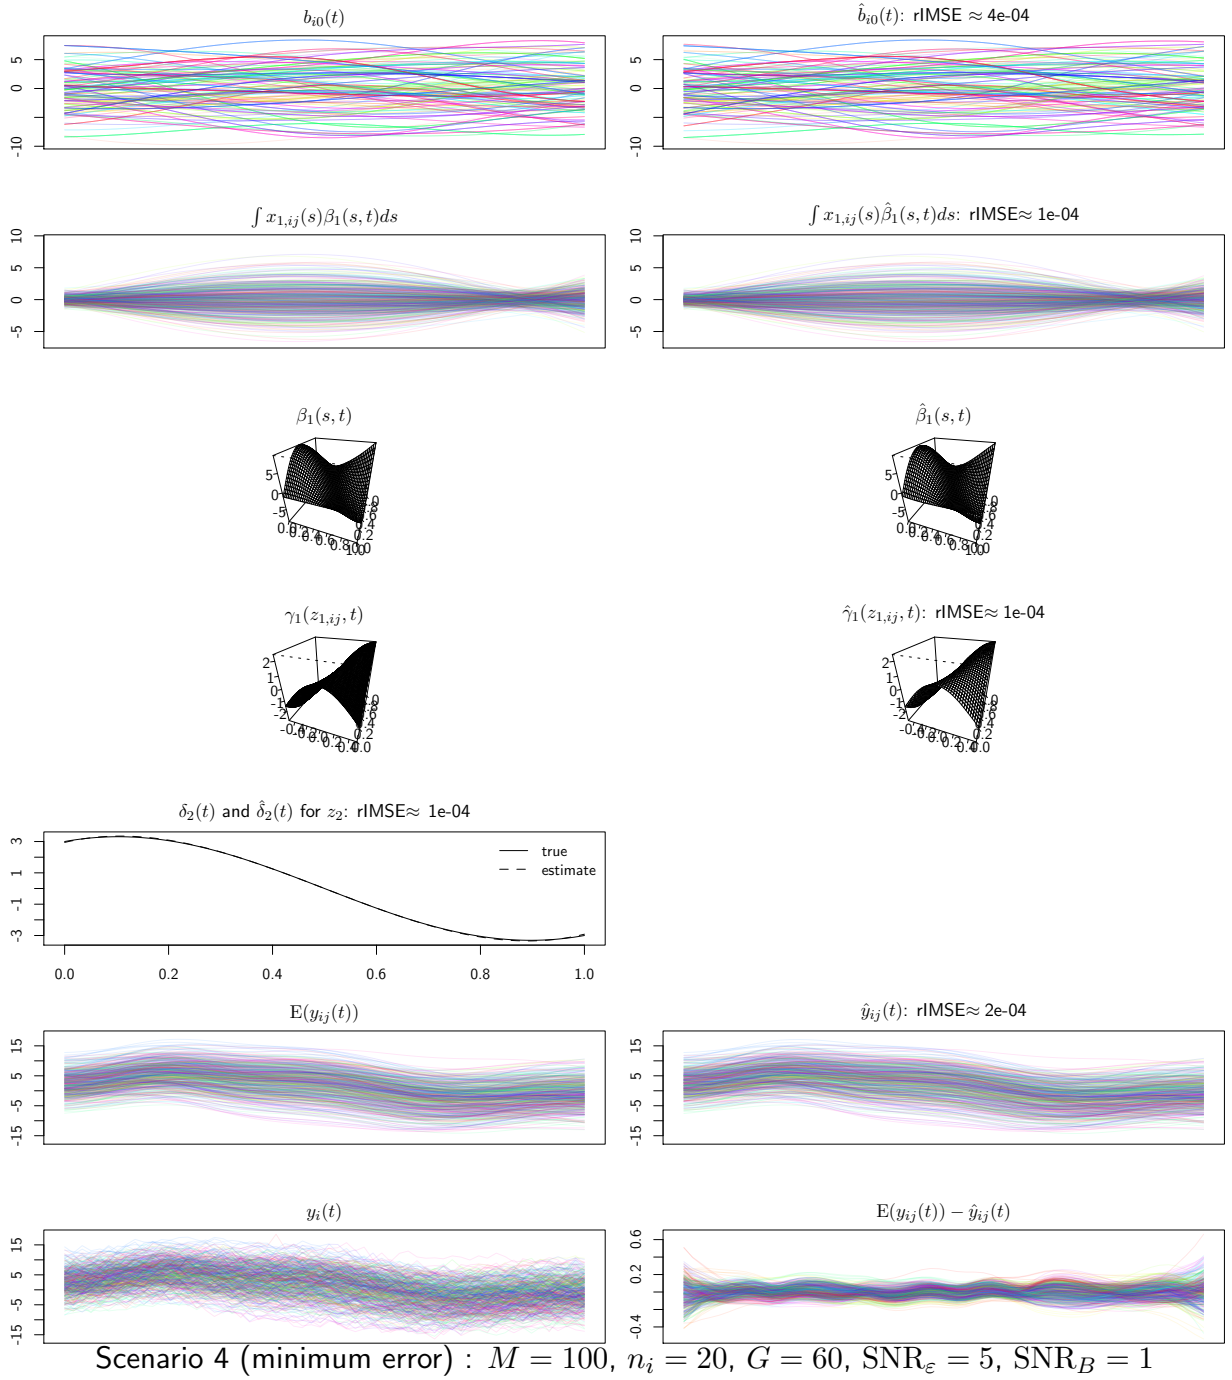

**Figure 29:** Example of data and fit for scenario 4 with minimum error.

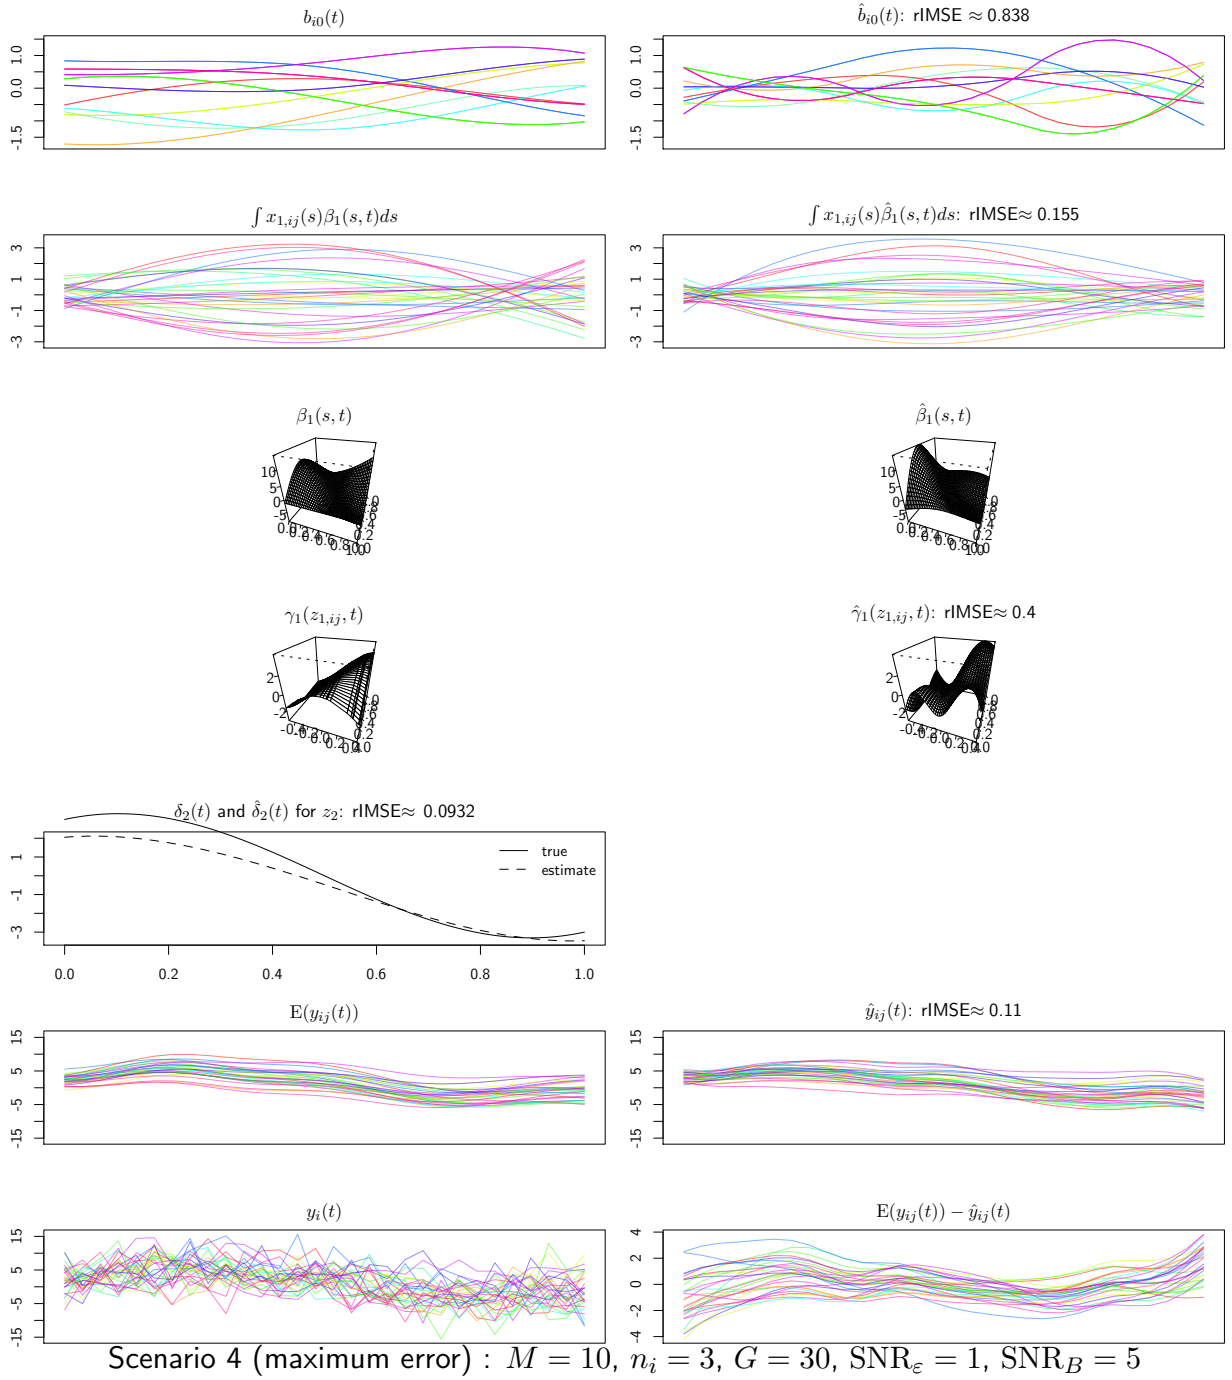

**Figure 30:** Example of data and fit for scenario 4 with maximum error.

81 **B.6 Comparison to WFMM**

82 The following graphs show the IMSE ratios for the the WFMM-based results (Herrick, 2013) tested for  
 83 scenario 1, i.e., the WFMM errors (and computation times) divided by those for pffr. We can only  
 84 provide this comparison for scenario 1 as the other scenarios feature terms that are not possible to  
 85 include in WFMM, which can only fit random effect curves and functional linear effects  $z_{ij}\beta(t)$  of  
 86 scalar covariates  $z$ . Note that, differing from the results for pffr in the main article, these results are  
 87 for balanced data, as the WFMM algorithm seems to fail whenever there are any subjects with 1 or 2  
 88 observations only, and 10 replicates per setting. In general, the IMSEs for WFMM are about double to  
 89 three times those of pffr. Note, however, that this comparison is not entirely fair to WFMM, as it was  
 90 designed for spiky data from spectrometry (i.e., it assumes sparsity in a suitable wavelet domain),  
 91 not the very smooth functional data we simulate here. Results for WFMM are based on the default  
 92 settings with Daubechies tap 4 wavelets, with the exception of an increased burn-in time of 2000  
 93 iterations and a longer sampling phase (10000 iterations keeping every tenth, not 5000 keeping every  
 94 fifth.). Results for other wavelet bases (Haar, Symmlet) were very similar.

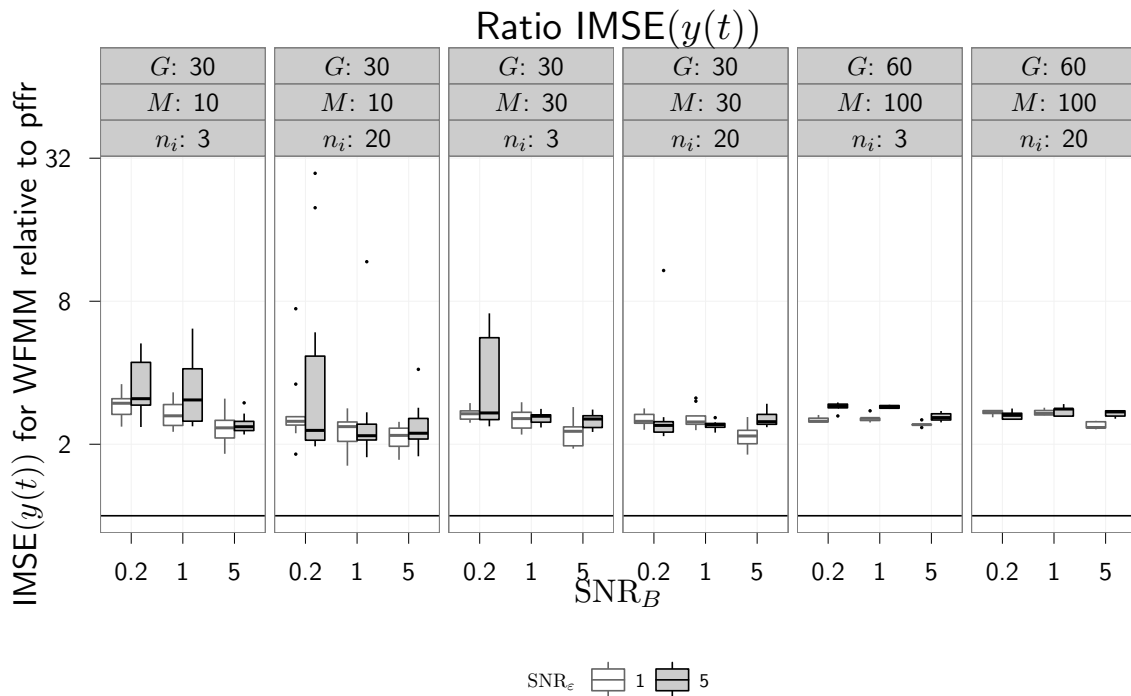

Figure 31: rIMSE for  $y_{ij}(t)$  for WFMM divided by pffr. Vertical axis on log<sub>2</sub>-scale.

95 Figure 34 shows that, although WFMM is much slower (4- to 16-fold) than pffr for small and  
 96 intermediate data sizes, it scales much better than pffr to large data sets due to its efficient data  
 97 representation in the wavelet domain and its very fast c++ implementation.



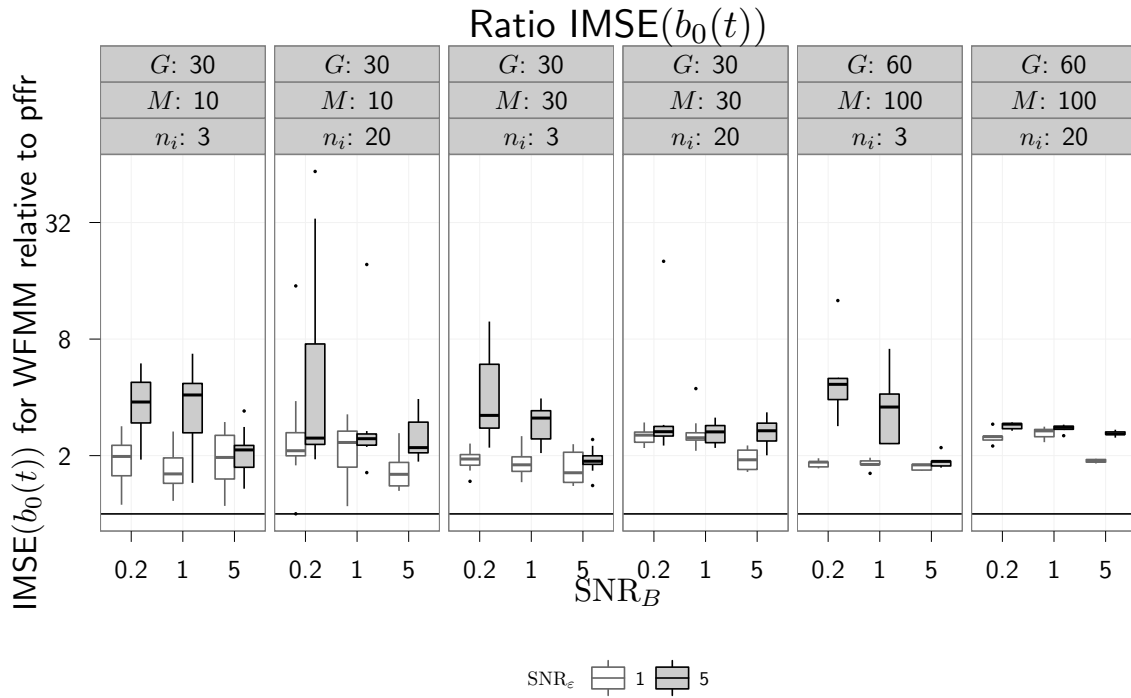

Figure 32: rIMSE for  $b_{0i}(t)$  for WFMM divided by pffr. Vertical axis on  $\log_2$ -scale.

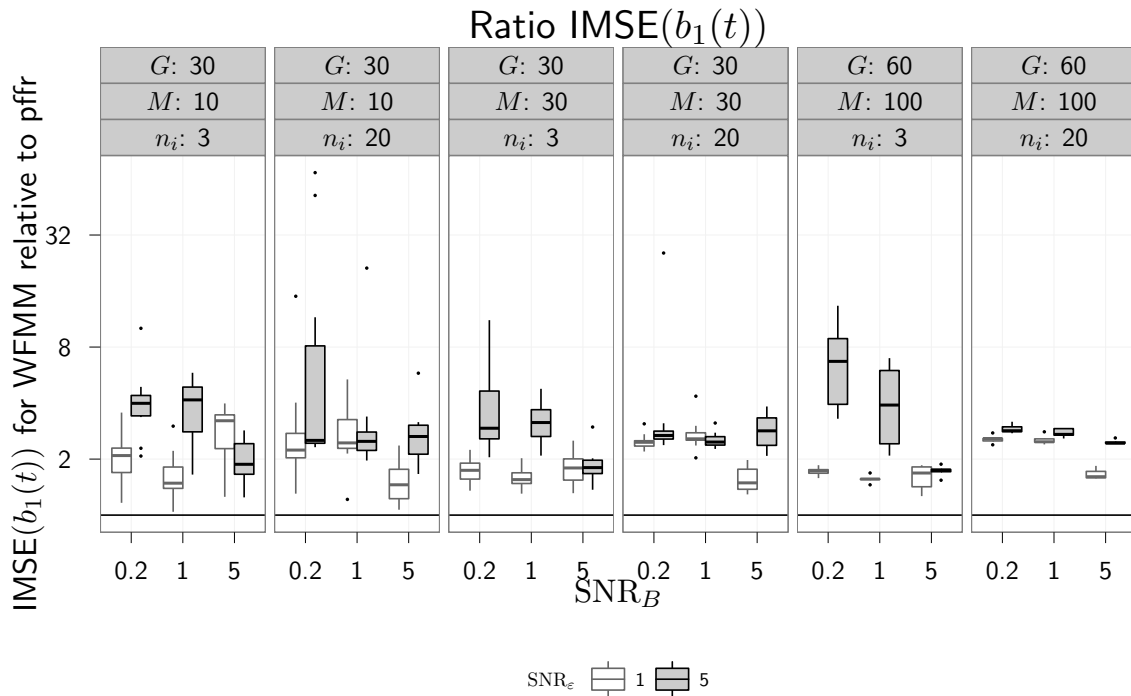

Figure 33: rIMSE for  $b_{1i}(t)$  for WFMM divided by pffr. Vertical axis on  $\log_2$ -scale.

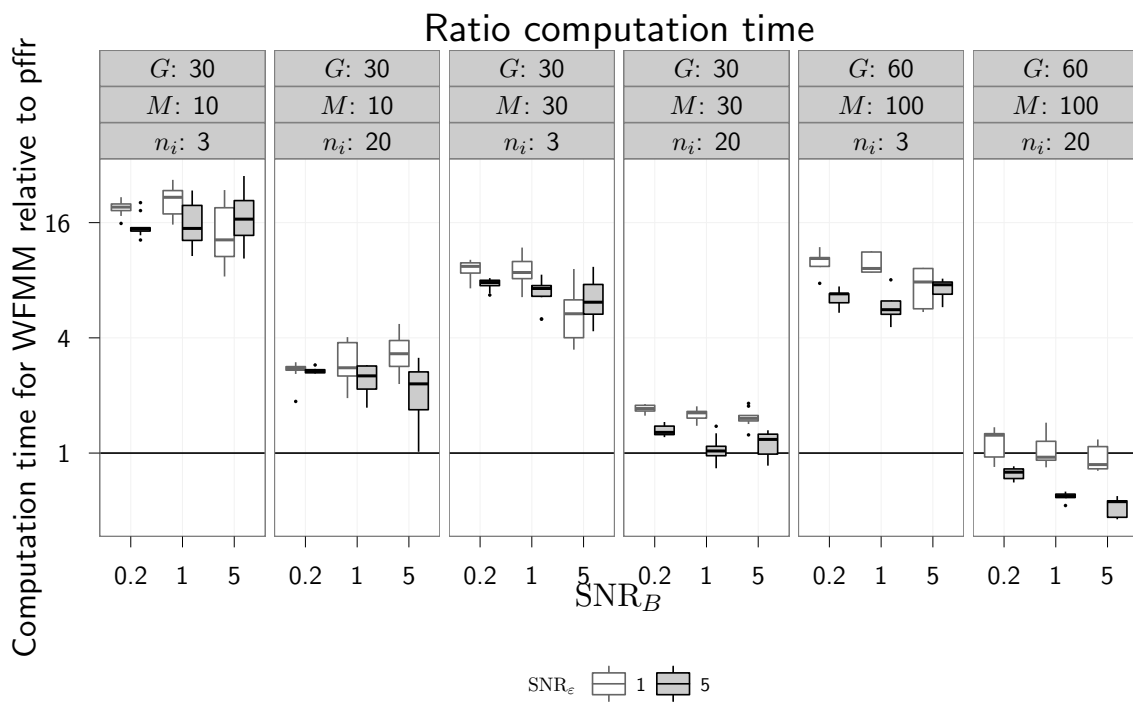

**Figure 34:** Computation times for WFMM divided by pffr. Vertical axis on  $\log_2$ -scale.

98 **C Predicting Precipitation Profiles from Temperature Curves for**  
99 **the Canadian Weather Data**

100 This section is primarily intended to show the flexibility and performance of `pffr` on this small toy  
101 data set with some example code and graphical summaries, and not to attempt a stringent model  
102 criticism or model comparisons. R-Code used to perform the analysis is set in typewriter font and  
103 put in light-grey boxes, output returned by the R-console is indicated by `##`. Comments in the code  
104 are indicated by `###`.

```
###load data:
data(CanadianWeather)
dataM <- with(CanadianWeather,
  list(
    temp = t(monthlyTemp),
    l10precip = t(log10(monthlyPrecip)),
    lat = coordinates[, "N.latitude"],
    lon = coordinates[, "W.longitude"],
    region = factor(region),
    place = factor(place)
  ))
### correct Prince George location
### (wrong at least until fda_2.2.7):
dataM$lon["Pr. George"] <- 122.75
dataM$lat["Pr. George"] <- 53.9
### center temperature curves:
dataM$tempRaw <- dataM$temp
dataM$temp <- sweep(dataM$temp, 2, colMeans(dataM$temp))
### define function indices
month.t <- 1:12
month.s <- 1:12
```

105 The Canadian weather data consists of temperature and precipitation curves, measured as the  
106 monthly average over several years at 35 Canadian weather stations (see Figure 35, top). The data  
107 has been used extensively in the functional data analysis literature. As it is available as part of the  
108 R-package `fda` (Ramsay et al., 2011), we can make our analysis fully reproducible, the full source  
109 code for this section is in the `CanadianWeather_Long.R` file included in this supplement.

110 We will here focus on both the functional relationship between temperature and precipitation  
111 profiles as well as on the spatial nature of the data, clearly visible from the locations of the weather  
112 stations depicted in Figure 35 (middle left). Ramsay and Silverman (2005) propose a concurrent  
113 model to predict precipitation profiles from temperature curves, where temperature is allowed to  
114 influence log-precipitation linearly at the same time point  $t$ . Within the framework of our model,  
115 we can investigate more flexible functional regression models that allow for cumulative and lagged  
116 temperature effects. Additionally, we can take into account the spatial correlation structure between  
117 weather stations.

118 **C.1 Model 1: Time-varying smooth effect for smooth spatially correlated resid-**  
119 **ual curves.**

We consider the model

$$y_i(t) = g_0(t) + \gamma(c_i, d_i, t) + b_{0i} + \int x_i(s)\beta(s, t)ds + \varepsilon_{it}, \quad \varepsilon_{it} \sim N(0, \sigma_\varepsilon^2),$$

120 where  $y_i(t)$  and  $X_i(t)$  denote the log-precipitation and the (centered) temperature at location  $i$   
 121 and time  $t$ , and  $c_i$  and  $d_i$  denote longitude and latitude of location  $i$ . As the temperature curves  
 122 were centered pointwise across stations and  $\gamma(c_i, d_i, t)$  is constrained to sum to zero for each  $t$ ,  
 123  $g_0(t)$  indicates the mean log-precipitation curve for a station with average temperature profile.  
 124 The spatio-temporal term  $\gamma(c_i, d_i, t)$  yields a smooth cyclic residual curve for each station, with a  
 125 spatial covariance structure induced by the bivariate spline basis for longitude and latitude and its  
 126 smoothness penalty. Alternatively, it can be viewed as a smooth spatial effect that varies cyclically  
 127 throughout the year. Small scale local differences in the levels of precipitation not captured by these  
 128 spatially correlated residuals are modelled with a scalar random intercept  $b_{0i} \stackrel{\text{i.i.d.}}{\sim} N(0, \sigma_b^2)$ . It is  
 129 important to note that the temperature and precipitation profiles considered here are averaged over  
 130 several years. Our model thus does not have the problem of ‘the future influencing the past’, but  
 131 relates general weather patterns to one another.

132 The temperature data is of very low rank, which can cause identifiability issues (c.f. Scheipl and  
 133 Greven, 2012), and we use a small number of basis functions to reflect the low information content  
 134 of the data:

```
### check effective rank of covariance of temperature deviations:

cov.temp <- crossprod(dataM$temp)
ev.cov.temp <- eigen(cov.temp)$values
cumsum(ev.cov.temp)/sum(ev.cov.temp)
## [1] 0.89238 0.97506 0.99335 0.99800 0.99892 0.99949 0.99976
## [8] 0.99984 0.99991 0.99996 0.99999 1.00000
### first 4 eigenfunctions represent >.995 of total variability
```

```
B <- smooth.construct.cc.smooth.spec(
  object=list(term="month.t", bs.dim=4, fixed=FALSE, dim=1,
             p.order=NA, by=NA),
  data=list(month.t=1:12), knots=list())
N.P <- B$X %*% Null(B$S[[1]])
N.X <- svd(t(dataM$temp))$u[, -(1:4)]
getSpanDist(svd(N.P)$u, N.X)
# 0.99676
```

135 To take into account the cyclic nature of both the response and the predictor curves, we use  
 136 cyclic basis functions in both  $s$  and  $t$  direction. The model can then be fit using the `pffr()` function  
 137 in the `refund` package (Crainiceanu et al., 2011) as

```
mM <- pffr(l10precip ~ s(lat,lon) + c(s(place, bs="re")) +
```

```

ff(temp, yind=month.t, xind=month.s,
  splinepars=list(bs=c("cc", "cc"), k=c(4, 4)),
  check.ident=FALSE),
  bs.int = list(bs = "cc", k=10), bs.yindex = list(bs="cc"),
  data=dataM, yind = month.t,
  knots=list(month.t.vec=c(0.5,12.5), temp.tmat=c(0.5,12.5),
    temp.smat=c(0.5,12.5)))
summary(mM)
##
## Family: gaussian
## Link function: identity
##
## Formula:
## l10precip ~ s(lat, lon) + c(s(place, bs = "re")) + ff(temp, yind = month.t,
##   xind = month.s, splinepars = list(bs = c("cc", "cc"), k = c(4,
##     4)), check.ident = FALSE)
##
## Constant coefficients:
##           Estimate Std. Error t value Pr(>|t|)
## (Intercept) 0.20852   0.00228   91.3   <2e-16 ***
## ---
## Signif. codes:  0 '***' 0.001 '**' 0.01 '*' 0.05 '.' 0.1 ' ' 1
##
## Smooth terms & functional coefficients:
##           edf Ref.df      F p-value
## Intercept(month.t)      6.87   8.00 196.94 < 2e-16 ***
## s(lat,lon)             113.88 167.00 590.34 0.00043 ***
## c(s(place))            23.08  35.00   9.87 < 2e-16 ***
## ff(temp,month.t,month.s)  5.29   5.98   1.88 0.08539 .
## ---
## Signif. codes:  0 '***' 0.001 '**' 0.01 '*' 0.05 '.' 0.1 ' ' 1
##
## R-sq.(adj) = 0.981   Deviance explained = 98.8%
## REML score = -416.05   Scale est. = 0.0023164   n = 420(35 x 12)

### get estimated coefficients, predictor components, and responses:
coefs <- coef(mM, n1=100, n2=80)
## using seWithMean for s(month.t.vec) .
## using seWithMean for te(lat,lon,month.t.vec) .
terms <- predict(mM, type="terms")
fit <- fitted(mM)

```

138 Here, `l10precip` and `temp` are  $35 \times 12$  matrices containing the log-precipitation and centered  
139 temperature profiles, respectively; `lat` and `lon` are vectors containing the latitude and longitude  
140 of each location, respectively, and `month.s` and `month.t` are vectors containing the months 1 to 12.  
141 A smooth overall mean function  $\alpha(t)$  (i.e, `Intercept(month.t)`) is added by default. `s(lat,lon)`  
142 yields a smooth spatio-temporal surface  $\gamma(c_i, d_i, t)$ . `c(s(place, bs="re"))` yields a scalar random  
143 intercept  $b_{0i}$  for the stations. `ff(temp, ..., splinepars=list(bs=c("cc", "cc"), k=c(4, 4)))` fits  
144 the linear functional regression term  $\int x_i(s)\beta(s, t)ds$ , with `bs=c("cc", "cc")` specifying a cyclic cubic  
145 regression spline basis with wrapped around penalty in both  $s$  and  $t$  direction and 4 marginal basis  
146 functions each (`k=c(4,4)`). We specify `check.ident=FALSE` in this case to switch off the identifiability  
147 check included in `ff()` that would warn us of the temperature data's low rank. `bs.int = list(bs =`  
148 `"cc", k=10)` and `bs.yindex = list(bs="cc")` specify a cyclic spline basis  $\Phi_t$  for the intercept curve

149 and all other terms that are functions in  $t$ . The `knots`-statement specifies the timepoints at which  
150 cyclic basis functions are “wrapped around”, i.e. timepoint 0.5 is equivalent to timepoint 12.5 in this  
151 case.

152 Most of the variation in the data is explained by the effect of temperature, followed by the  
153 spatially varying functional random intercept  $\gamma(c_i, d_i, t)$  and the scalar random intercept. The  
154 estimated overall mean function (Figure 35, bottom left) shows a seasonal pattern, with slightly  
155 lower precipitation in the spring and higher precipitation in the fall, above and beyond what is  
156 explained by the effect of temperature.

157 The effect of temperature on log-precipitation is shown in Figure 35 (bottom right). In  $s$   
158 direction, a clear seasonal pattern is visible, with higher temperatures in winter and especially  
159 autumn associated with an increase of precipitation, and higher temperatures in the spring and  
160 summer associated with a decrease of precipitation. In  $t$  direction, effects are much stronger for the  
161 winter months, and much weaker for the summer months, especially the effect of winter temperatures  
162 on precipitation in the middle of the year; a plausible result.

163 The spatially correlated smooth residual plus the scalar random intercept for each weather  
164 station is depicted in Figure 35 (middle right – see Figure 36 for a version without overlapping). It  
165 shows some interesting local features, which clearly illustrate that regional effects cannot capture  
166 the spatially varying structure of precipitation curves adequately. For example, the Arctic station  
167 Inuvik in the very north-west shows a similar error pattern to Continental stations in the north-west  
168 (precipitation higher in winter and lower in the summer and especially in spring). These northern  
169 Continental stations, in turn, exhibit a pattern which is completely different than that of the more  
170 southern Continental stations (higher in the summer and lower in the winter). Another perspective  
171 on  $\gamma(c_i, d_i, t)$  is to view it as a smoothly time-varying surface estimate for a spatial effect. Figure  
172 37 displays the temporal evolution of  $\gamma(c_i, d_i, t)$  over the year. We can distinguish essentially two  
173 phases, an autumn/winter phase (top row, left three panels of bottom row) with higher precipitation  
174 in the coastal regions and lower precipitation in the interior than what can be explained by the  
175 mean temperature deviations, followed by a short transition phase and then a late spring/summer  
176 phase with increased precipitation in the interior, especially in the south and relative to the Atlantic  
177 Coast region. The right panel in the bottom row shows BLUPS for the estimated uncorrelated scalar  
178 random intercepts  $b_{i0}$  on the same vertical scale as the remainder of the panels. Note the fairly high  
179 small-scale variability in mean precipitation levels that has about the same magnitude as the smooth  
180 time-varying spatial effect.

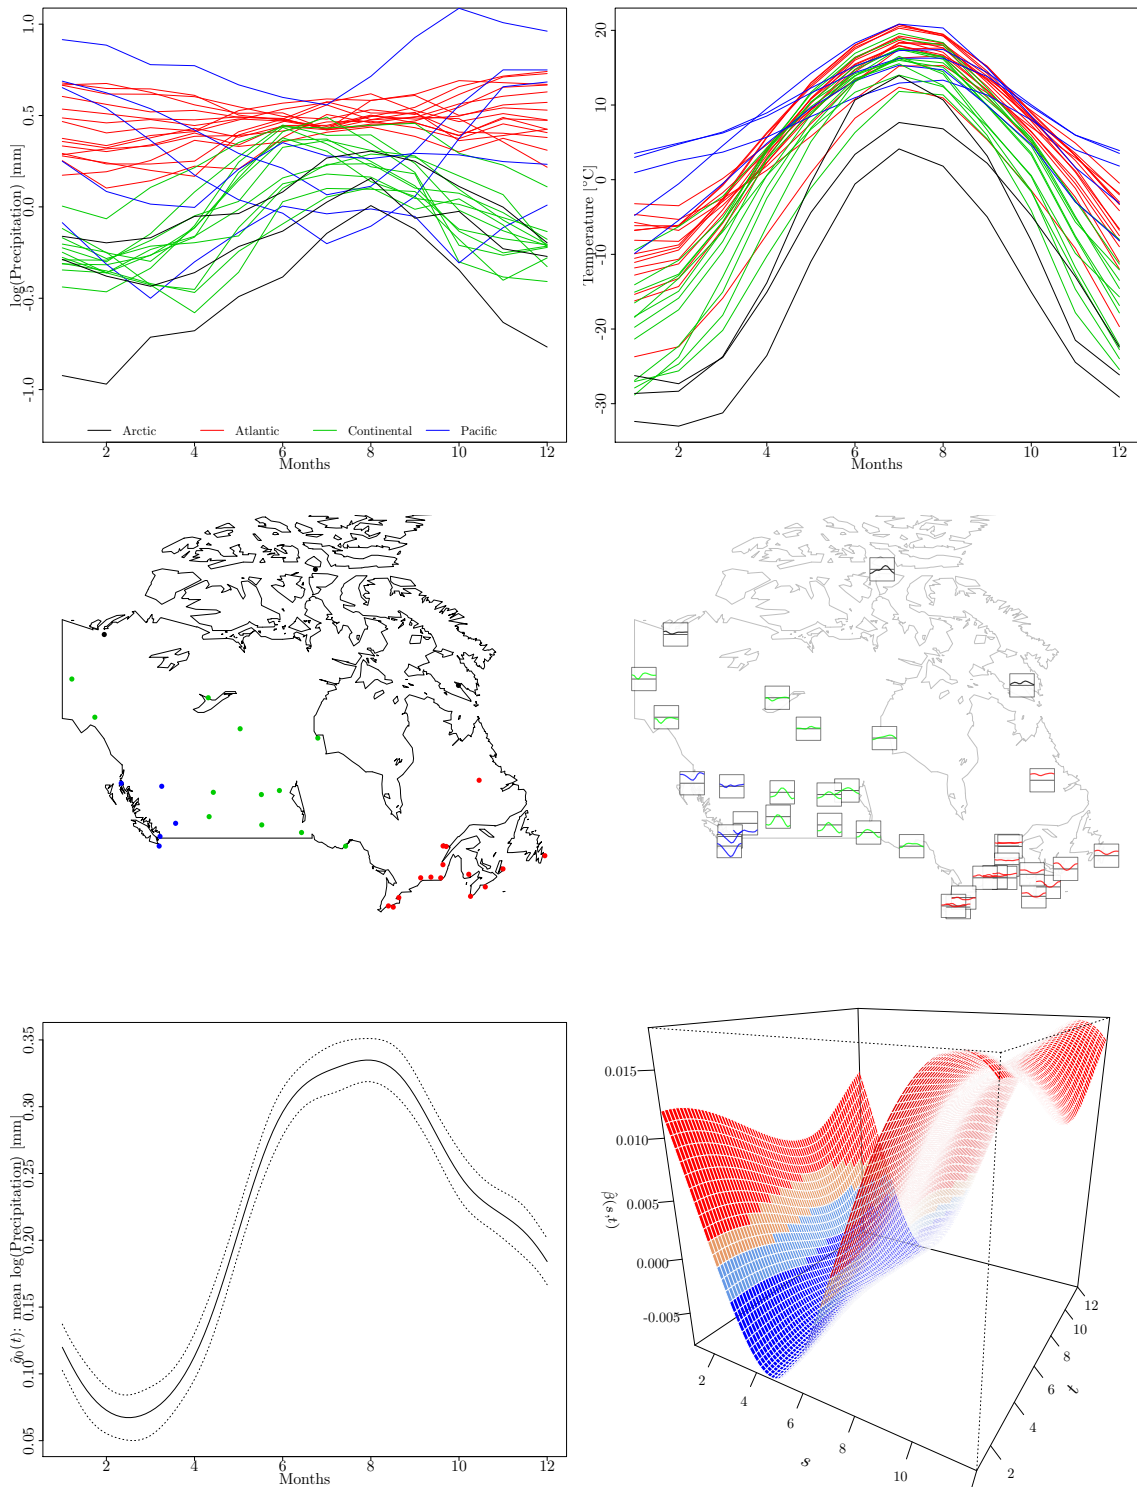

**Figure 35:** Log-precipitation (top left) and temperature (top right) at 35 Canadian weather stations. Middle left: Stations' locations. Middle right: Estimated spatially correlated smooth residual for each weather station. Bottom left: Estimated overall mean effect. Bottom right: Estimated functional effect  $\hat{\beta}(s, t)$  of temperature in month  $s$  on log-precipitation in month  $t$ , color-coded for sign and pointwise significance (95%): blue if significantly  $< 0$ , lightblue if  $< 0$ , lightred if  $> 0$ , red if sig.  $> 0$ .

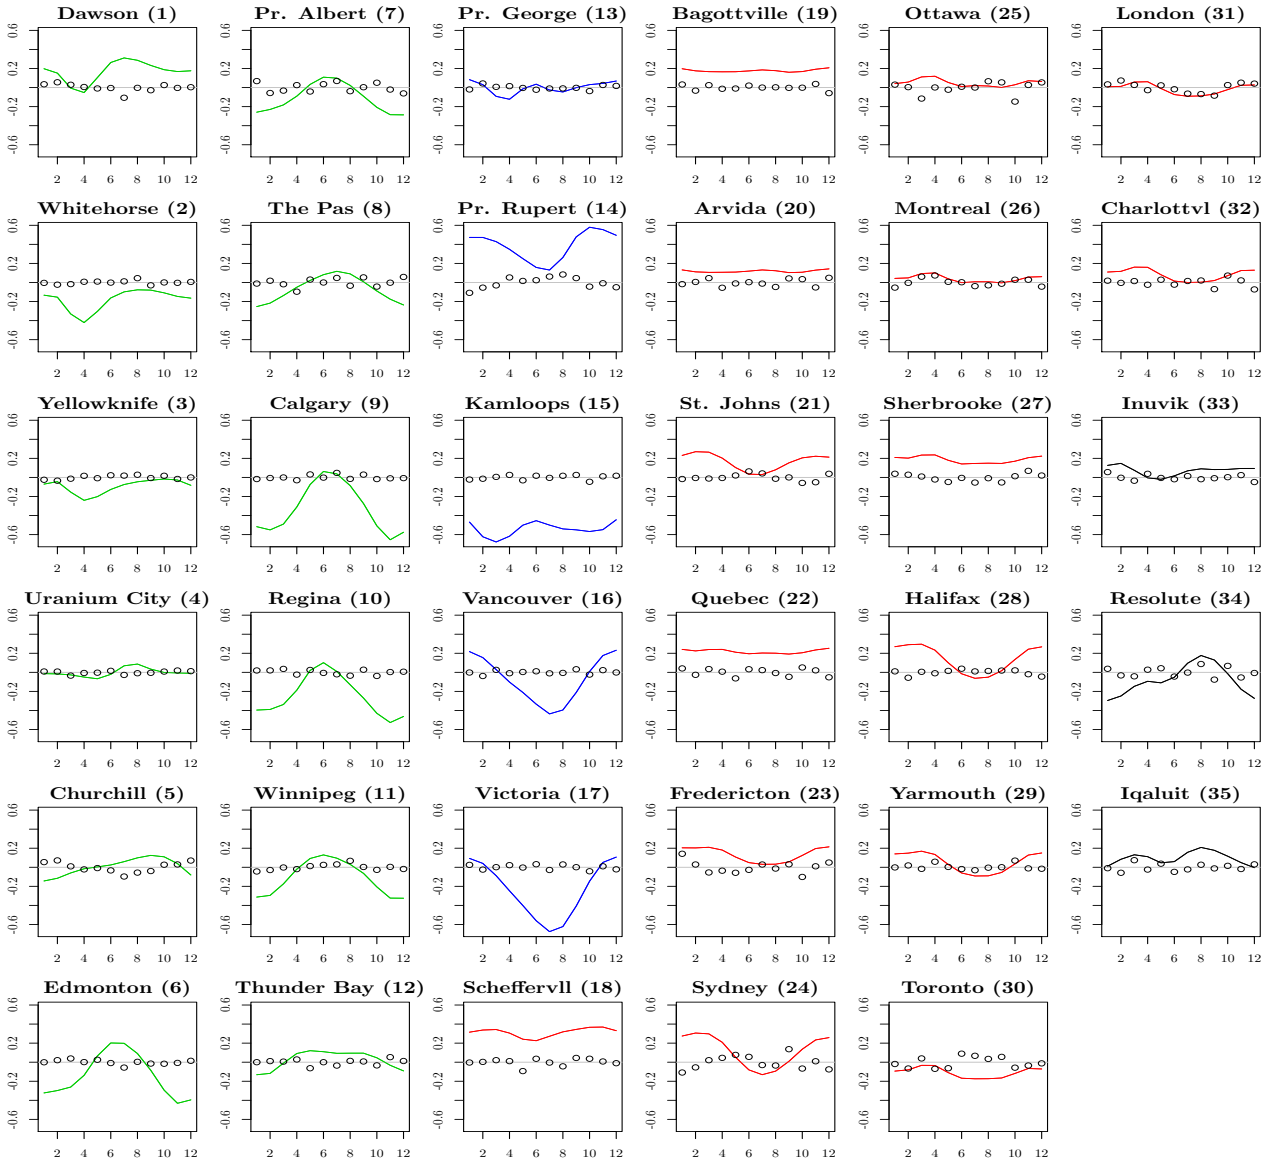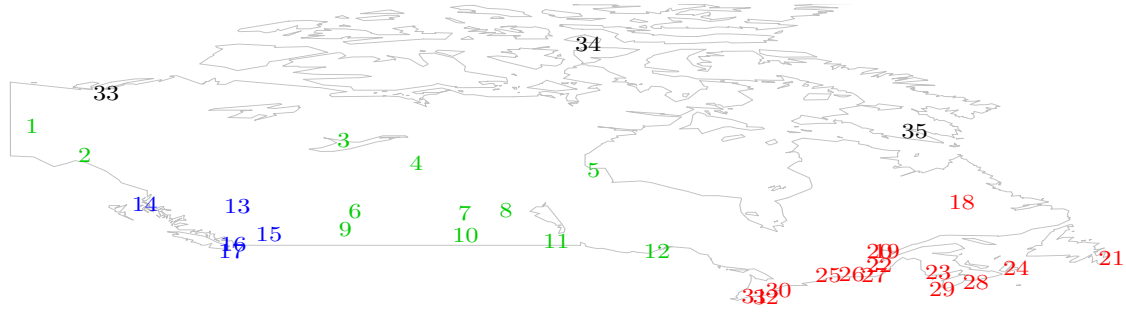

**Figure 36:** Solid lines: Spatially correlated smooth residual curves plus scalar random intercept for each weather station. Points: Observed errors  $y_i(t) - \hat{y}_i(t)$ . Stations are roughly ordered from north-west to south-east within regions. Color coding is as in Figure 35.



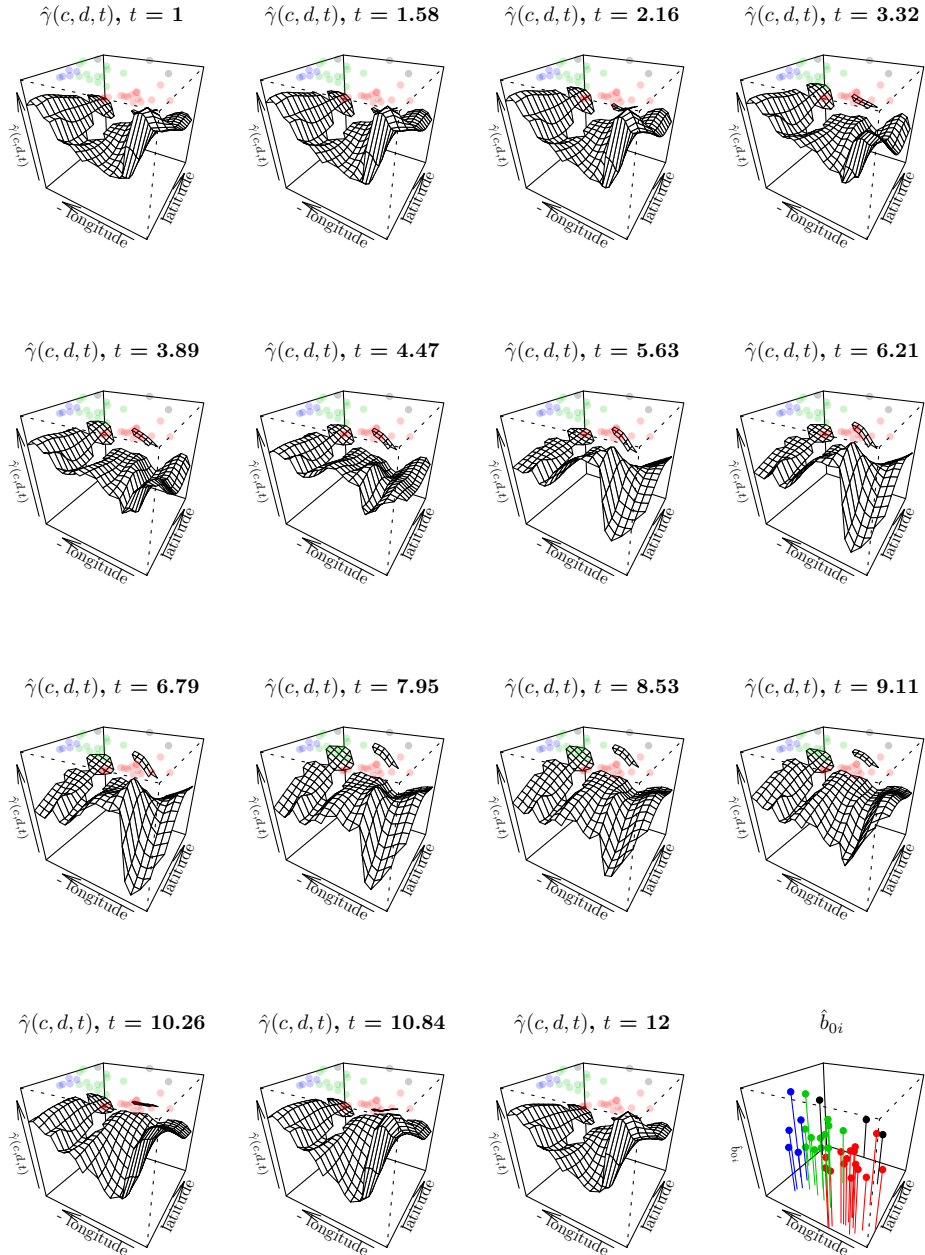

**Figure 37:** Time-varying spatial effect  $\hat{\gamma}(c_i, d_i, t)$  over the course of the year and scalar random intercepts  $\hat{b}_{0i}$ . Station locations given by the dots at the top of the plots.

181 **C.2 Model 2: Time-varying regional effects and spatially un-correlated residual**  
 182 **curves**

For comparison, a simpler model ignoring the spatial correlation

$$y_i(t) = \alpha_{g_i}(t) + \int x_i(s)\beta(s,t)ds + e_i(t) + \varepsilon_{it}, \quad \varepsilon_{it} \sim N(0, \sigma_\varepsilon^2)$$

183 could be fit. Here,  $g_i$  indicates which of the four climate regions (Atlantic, Continental, Pacific and  
 184 Arctic)  $i$  belongs to and  $\alpha_{g_i}(t)$  thus denotes a region-specific intercept curve.  $e_i(t)$  is a location-specific  
 185 smooth residual centered at zero for each  $t$ . This model can be fit via

```
mR <- pffr(l10precip ~ 0 + c(0) + region + c(region) +
  s(place, bs="re") +
  ff(temp, yind=month.t, xind=month.s,
    splinepars=list(bs=c("cc", "cc"), k=c(4, 4)),
    check.ident=FALSE),
    bs.int = list(bs = "cc", k=10), bs.yindex = list(bs="cc"),
    data=dataM, yind = month.t,
    knots=list(month.t.vec=c(0.5,12.5), temp.tmat=c(0.5,12.5),
      temp.smat=c(0.5,12.5)))
### get estimated coefficients, predictor components, and responses:
coefsR <- coef(mR, n1=100, n2=80)
termsR <- predict(mR, type="terms")
fitR <- fitted(mR)
```

186 Specifically, `region + c(region)` yields time-varying region effects not centered at zero, made all  
 187 estimable by dropping the constant and time-varying intercepts via `0 + c(0)`, and `s(place, bs =`  
 188 `"re")` is used to obtain location-specific smooth residuals  $e_i(t)$ . In the notation of section 2.4 in the  
 189 main article, this corresponds to estimating a functional random intercept for each observation  $i$ ,  
 190 with no inter-subject correlation ( $\mathbf{P}_x = \mathbf{I}_{35}$ ).

191 Estimated regional effects and the coefficient surface for temperature deviations are displayed in  
 192 Figure 38. Estimated temperature effects are very similar for the two models, indicating that either  
 193 model formulation captures the spatial component of the responses' variability well enough to allow  
 194 for a reliable estimate of the temperature effect. The spatially uncorrelated smooth residuals are  
 195 shown in Figure 39. Note that they are fairly similar for closely neighboring stations despite the fact  
 196 that no spatial correlation structure was assumed here.

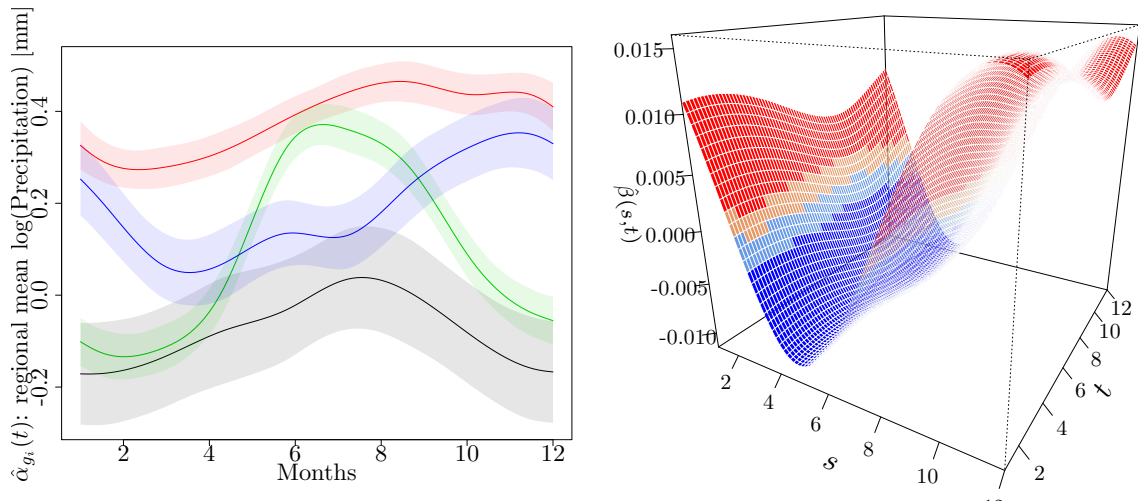

**Figure 38:** Estimated effects for a model with region-specific intercepts and spatially uncorrelated smooth residuals. Left: Estimated region effects and approximate pointwise 95% confidence intervals (Arctic, Atlantic, Continental, Pacific). Right: Estimated functional effect  $\hat{\beta}(s, t)$  of temperature in month  $s$  on log-precipitation in month  $t$ , color-coded for sign and pointwise significance (95%): blue if significantly  $< 0$ , lightblue if  $< 0$ , lightred if  $> 0$ , red if sig.  $> 0$ .

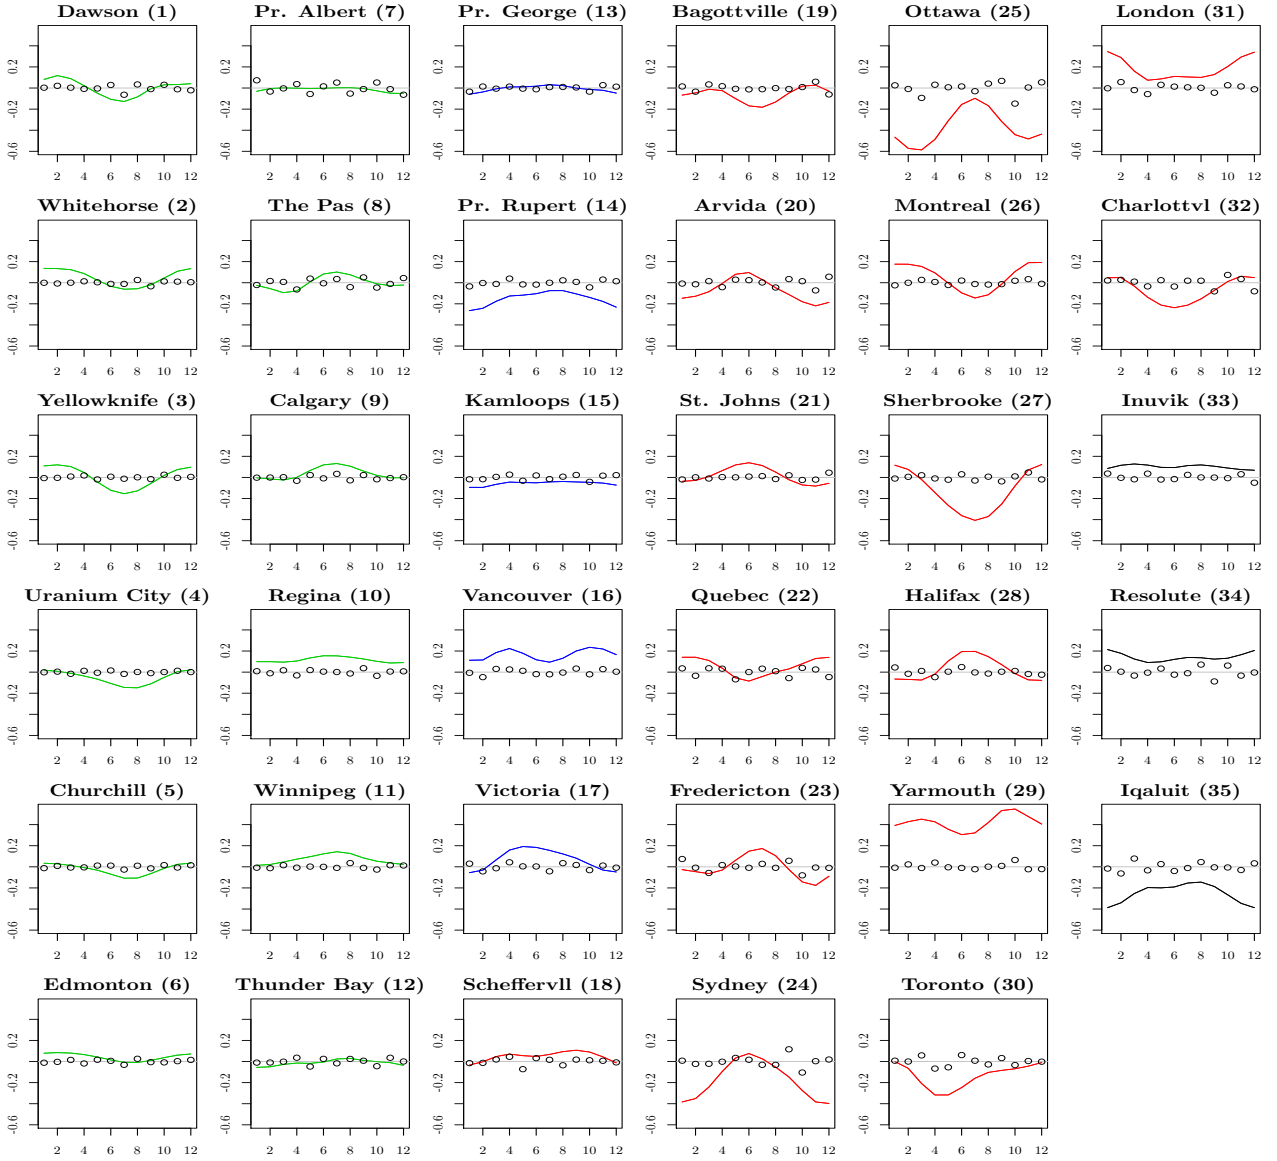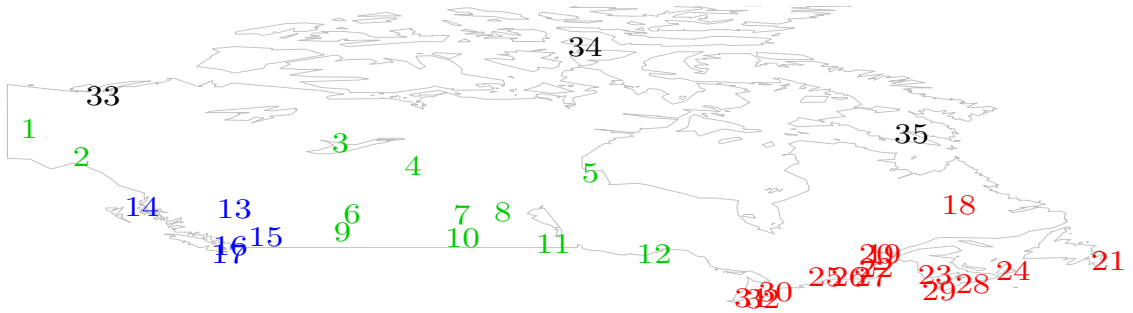

**Figure 39:** Solid lines: Spatially uncorrelated smooth residual curves for each weather station for the model with regional effects. Points: Observed errors  $y_i(t) - \hat{y}_i(t)$ . Stations are roughly ordered from north-west to south-east within regions. Color coding as in previous figures.

197 **C.3 Models 3-6: Time-varying regional effects and spatially correlated residual**  
 198 **curves with fixed correlation structures**

We fit a model

$$y_i(t) = \alpha_{g_i}(t) + \int x_i(s)\beta(s,t)ds + e_i(t) + \varepsilon_{it}, \quad \varepsilon_{it} \sim N(0, \sigma_\varepsilon^2)$$

199 with a marginal spatial correlation structure for the smooth residual curves  $e_i(t)$  to encourage  
 200 similarity of residual curves for stations that are in close proximity. In `pffr`, we can achieve this  
 201 by using the inverse of a given correlation matrix as the marginal precision for a Gaussian random  
 202 field across the different stations. In the notation of section 2.4 in the main article, we now use the  
 203 inverse of a spatial correlation matrix of the stations as  $\mathbf{P}_x$ .

```
locations <- cbind(dataM$lon, dataM$lat)
### fix location names s.t. they correspond to levels in places
rownames(locations) <- as.character(dataM$place)
### get great circle distances between locations:
dist <- rdist.earth(locations, miles=FALSE, R=6371)
```

204 For example, we could choose smoothness parameters  $\nu = .5$  (i.e, the exponential correlation  
 205 function),  $\nu = 1$  and  $\nu = 10$  and range parameters chosen so that the correlation drops to about 0.2  
 206 for great circle distances of 500 km, 1500 km and 3000 km, respectively:

```
### construct Matern correlation matrices as
### marginal penalty for a GRF over the locations:

### find ranges for nu = .5, 1 and 10
### where the correlation drops to .2 at a distance of 500/1500/3000 km
### (about the 10%/40%/70% quantiles of distances here)
r.5 <- Matern.cor.to.range(500, nu=0.5, cor.target=.2)
r1 <- Matern.cor.to.range(1500, nu=1.0, cor.target=.2)
r10 <- Matern.cor.to.range(3000, nu=10.0, cor.target=.2)
### compute correlation matrices
corr_nu.5 <- apply(dist, 1, Matern, nu=.5, range=r.5)
corr_nu1 <- apply(dist, 1, Matern, nu=1, range=r1)
corr_nu10 <- apply(dist, 1, Matern, nu=10, range=r10)

### invert to get precisions
P_nu.5 <- solve(corr_nu.5)
P_nu1 <- solve(corr_nu1)
P_nu10 <- solve(corr_nu10)
```

207 To fit models where entry  $(i, j)$  in  $(\mathbf{P}_x)^{-1}$  is  $\rho(d((c_i, d_i), (c_j, d_j)); \nu, \text{range})$ , with latitudes  $c_i$  and  
 208 longitudes  $d_i$ , great circle distance function  $d()$ , and Matèrn correlation function  $\rho(d; \nu, \text{range})$  we  
 209 specify an `mrf`-term (“Markov” random field, actually a conventional Gaussian random field in this  
 210 case) for the different stations, and supply the inverse of the Matèrn correlation matrix as the  
 211 precision of the Markov random field, i.e. we specify  
 212 `s(place, bs="mrf", k=35, xt=list(list(penalty=P.nu1))`). Specifying the `k`-argument to equal the  
 213 number of locations avoids the low-rank approximation of the MRF used by default in `mgcv`, because  
 214 this approximation only worked for positive *semi*-definite precision matrices at the time of writing.

```
mR_nu.5 <- pffr(l10precip ~ 0 + c(0) + region + c(region) +
```

```

s(place, bs="mrf", k=35, xt=list(list(penalty=P_nu.5))) +
ff(temp, yind=month.t, xind=month.s,
  splinepars=list(bs=c("cc", "cc"), k=c(4, 4)),
  check.ident=FALSE),
  bs.int = list(bs = "cc", k=10), bs.yindex = list(bs="cc"),
  data=dataM, yind = month.t,
  knots=list(month.t.vec=c(0.5,12.5), temp.tmat=c(0.5,12.5),
    temp.smat=c(0.5,12.5)))
summary(mR_nu.5)
##
## Family: gaussian
## Link function: identity
##
## Formula:
## l10precip ~ 0 + c(0) + region + c(region) + s(place, bs = "mrf",
##   k = 35, xt = list(list(penalty = P_nu.5))) + ff(temp, yind = month.t,
##   xind = month.s, splinepars = list(bs = c("cc", "cc"), k = c(4,
##   4)), check.ident = FALSE)
##
## Constant coefficients:
##           Estimate Std. Error t value Pr(>|t|)
## regionArctic    -0.06775    0.01134   -5.97  8.7e-09 ***
## regionAtlantic    0.37988    0.00400   94.90 < 2e-16 ***
## regionContinental 0.09383    0.00444   21.11 < 2e-16 ***
## regionPacific     0.17714    0.00945   18.75 < 2e-16 ***
## ---
## Signif. codes:  0 '***' 0.001 '**' 0.01 '*' 0.05 '.' 0.1 ' ' 1
##
## Smooth terms & functional coefficients:
##           edf Ref.df      F p-value
## regionArctic(month.t)      2.66  8.00  0.96 7.4e-05 ***
## regionAtlantic(month.t)    5.84  8.00 11.52 5.3e-12 ***
## regionContinental(month.t) 7.17  8.00 14.27 < 2e-16 ***
## regionPacific(month.t)     5.18  8.00  2.30 4.8e-07 ***
## s(place)                   160.66 237.00 26.63 < 2e-16 ***
## ff(temp,month.t,month.s)    5.45  5.48 71.46 < 2e-16 ***
## ---
## Signif. codes:  0 '***' 0.001 '**' 0.01 '*' 0.05 '.' 0.1 ' ' 1
##
## R-sq.(adj) = 0.986   Deviance explained = 99.3%
## REML score = -427.57   Scale est. = 0.0016962   n = 420(35 x 12)

```

```

mR_nu1 <- pffr(l10precip ~ 0 + c(0) + region + c(region) +

```

```

s(place, bs="mrf", k=35, xt=list(list(penalty=P_nu1))) +
ff(temp, yind=month.t, xind=month.s,
  splinepars=list(bs=c("cc", "cc"), k=c(4, 4)),
  check.ident=FALSE),
  bs.int = list(bs = "cc", k=10), bs.yindex = list(bs="cc"),
  data=dataM, yind = month.t,
  knots=list(month.t.vec=c(0.5,12.5), temp.tmat=c(0.5,12.5),
    temp.smat=c(0.5,12.5)))
summary(mR_nu1)
##
## Family: gaussian
## Link function: identity
##
## Formula:
## l10precip ~ 0 + c(0) + region + c(region) + s(place, bs = "mrf",
##   k = 35, xt = list(list(penalty = P_nu1))) + ff(temp, yind = month.t,
##   xind = month.s, splinepars = list(bs = c("cc", "cc"), k = c(4,
##   4)), check.ident = FALSE)
##
## Constant coefficients:
##           Estimate Std. Error t value Pr(>|t|)
## regionArctic    -0.06184    0.01158   -5.34 2.2e-07 ***
## regionAtlantic    0.37963    0.00397   95.56 < 2e-16 ***
## regionContinental 0.09528    0.00446   21.35 < 2e-16 ***
## regionPacific     0.17087    0.00981   17.41 < 2e-16 ***
## ---
## Signif. codes:  0 '***' 0.001 '**' 0.01 '*' 0.05 '.' 0.1 ' ' 1
##
## Smooth terms & functional coefficients:
##           edf Ref.df      F p-value
## regionArctic(month.t)      2.95  8.00  1.39 6.1e-06 ***
## regionAtlantic(month.t)    5.82  8.00 15.71 1.3e-10 ***
## regionContinental(month.t) 7.16  8.00 13.25 < 2e-16 ***
## regionPacific(month.t)     5.19  8.00  2.48 6.2e-07 ***
## s(place)                   160.82 237.00 27.39 < 2e-16 ***
## ff(temp,month.t,month.s)    5.24  5.29 102.34 < 2e-16 ***
## ---
## Signif. codes:  0 '***' 0.001 '**' 0.01 '*' 0.05 '.' 0.1 ' ' 1
##
## R-sq.(adj) = 0.987   Deviance explained = 99.3%
## REML score = -432.11   Scale est. = 0.0016658   n = 420(35 x 12)

```

```

mR_nu10 <- pffr(l10precip ~ 0 + c(0) + region + c(region) +

```

```

s(place, bs="mrf", k=35, xt=list(list(penalty=P_nu10))) +
ff(temp, yind=month.t, xind=month.s,
  splinepars=list(bs=c("cc", "cc"), k=c(4, 4)),
  check.ident=FALSE),
  bs.int = list(bs = "cc", k=10), bs.yindex = list(bs="cc"),
  data=dataM, yind = month.t,
  knots=list(month.t.vec=c(0.5,12.5), temp.tmat=c(0.5,12.5),
    temp.smat=c(0.5,12.5)))
summary(mR_nu10)
##
## Family: gaussian
## Link function: identity
##
## Formula:
## l10precip ~ 0 + c(0) + region + c(region) + s(place, bs = "mrf",
##   k = 35, xt = list(list(penalty = P_nu10))) + ff(temp, yind = month.t,
##   xind = month.s, splinepars = list(bs = c("cc", "cc"), k = c(4,
##   4)), check.ident = FALSE)
##
## Constant coefficients:
##           Estimate Std. Error t value Pr(>|t|)
## regionArctic   -0.06119   0.01182   -5.18 4.6e-07 ***
## regionAtlantic  0.37996   0.00406  93.64 < 2e-16 ***
## regionContinental 0.09544   0.00456  20.93 < 2e-16 ***
## regionPacific   0.16910   0.01004  16.84 < 2e-16 ***
## ---
## Signif. codes:  0 '***' 0.001 '**' 0.01 '*' 0.05 '.' 0.1 ' ' 1
##
## Smooth terms & functional coefficients:
##           edf Ref.df    F p-value
## regionArctic(month.t)    2.79  8.00  1.53 3.9e-06 ***
## regionAtlantic(month.t)  5.77  8.00 16.06 3.5e-10 ***
## regionContinental(month.t) 7.08  8.00 13.63 < 2e-16 ***
## regionPacific(month.t)    5.54  8.00  2.97 6.0e-08 ***
## s(place)                 140.22 235.00 67.32 1.2e-11 ***
## ff(temp,month.t,month.s)  5.99  6.28 78.56 < 2e-16 ***
## ---
## Signif. codes:  0 '***' 0.001 '**' 0.01 '*' 0.05 '.' 0.1 ' ' 1
##
## R-sq.(adj) = 0.986   Deviance explained = 99.2%
## REML score = -417.28   Scale est. = 0.0017421   n = 420(35 x 12)

```

215 As the summaries show, the fits are very similar and robust against different specifications of the  
216 spatial correlation structure.

217 For a less arbitrary approach, we can try numerical optimization to find Matérn parameters for  
218 the correlation function that maximize the model's likelihood:

```
### define optimization criterion:
```



```

optll <- function(par){
  nu <- par[1]
  range <- par[2]
  ### construct Matern correlation matrix as
  ### marginal penalty for a GRF over the locations:
  corr <- apply(dist, 1, Matern, nu=nu, range=range)
  ### invert to get precisions
  P <- try(solve(corr))
  ### fit model
  m <- try(pffr(l10precip ~ 0 + c(0) + region + c(region) +
    s(place, bs="mrf", k=35, xt=list(list(penalty=P)))) +
    ff(temp, yind=month.t, xind=month.s,
      splinepars=list(bs=c("cc", "cc"), k=c(4, 4)),
      check.ident=FALSE),
        bs.int = list(bs = "cc", k=10), bs.yindex = list(bs="cc"),
        data=dataM, yind = month.t,
        knots=list(month.t.vec=c(0.5,12.5), temp.tmat=c(0.5,12.5),
          temp.smat=c(0.5,12.5))))
  ### return likelihood
  if(class(m)[1] != "try-error"){
    cat("nu:", nu, "--range:", range, "--ll:", logLik(m), "\n")
    return(as.numeric(logLik(m)))
  } else {
    cat("nu:", nu, "--range:", range, "--nope.\n")
    return(1500)
  }
}

### find optimal values (takes quite a long run time,
### results not entirely stable due to many local maxima.)
nurange <- optim(c(1, 3000), optll,
  lower = c(0.1, 200), upper=c(10, 4000),
  method = "L-BFGS-B",
  control=list(fnscale=-1, parscale=c(1, 100),
    factr=1e4, ndeps=c(2e-1, 2)))
# ....
#nu: 0.71885 --range: 3000.2 --ll: 876.35

### use optimal nu=0.7, range=3000
corr_nu.7 <- apply(dist, 1, Matern, nu=.7, range=3000)
### invert to get precisions
P_nu.7 <- solve(corr_nu.7)

mR_nu.7 <- pffr(l10precip ~ 0 + c(0) + region + c(region) +
  s(place, bs="mrf", k=35, xt=list(list(penalty=P_nu.7)))) +
  ff(temp, yind=month.t, xind=month.s,
    splinepars=list(bs=c("cc", "cc"), k=c(4, 4)),
    check.ident=FALSE),
      bs.int = list(bs = "cc", k=10), bs.yindex = list(bs="cc"),
      data=dataM, yind = month.t,
      knots=list(month.t.vec=c(0.5,12.5), temp.tmat=c(0.5,12.5),
        temp.smat=c(0.5,12.5)))

summary(mR_nu.7)

```

219 It should be noted, however, that the likelihood surface is very flat in these parameters and that  
 220 many other Matérn parameters yield practically identical fits and likelihoods. Figure 40 shows the  
 221 shapes of the four correlation functions – we fit one model with a very quickly decreasing correlation  
 222 structure ( $\nu = 0.5$ ), one intermediate correlation structure ( $\nu = 1$ ), one model with a very persistent  
 223 spatial correlation structure ( $\nu = 10$ ), and one with parameters ( $\nu = 0.7$ , range= 3000) determined  
 by numerical optimization yielding a very long-range correlation structure.

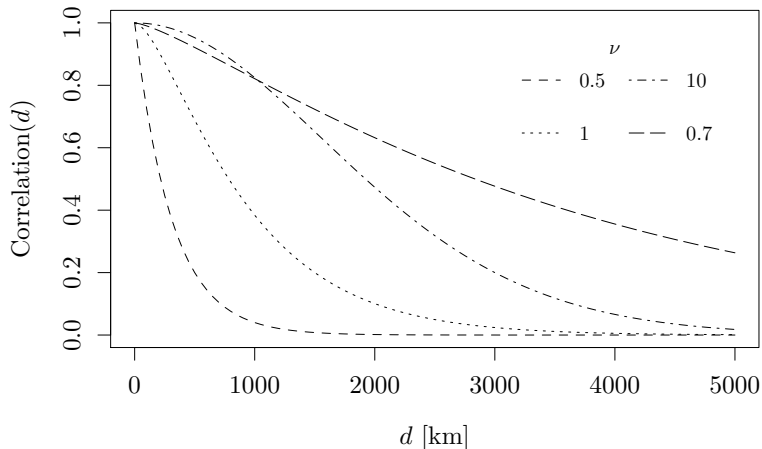

**Figure 40:** Four different Matérn correlation functions. Range parameters are 311, 624, 377, and 3000, respectively, for  $\nu = 0.5$ ,  $\nu = 1$ ,  $\nu = 10$  and  $\nu = 0.7$

224  
 225 Figures 41 to 43 compare the estimated effects for the model with region effects and spatially  
 226 correlated random effects. As seen in figure 41, region effects are very robust against the different  
 227 specifications for the smooth residual terms. Figure 42 shows that, as the spatial correlation of the  
 228 smooth residuals increases (and thus the flexibility of the residual terms decreases), the temperature  
 229 effect becomes somewhat larger, while retaining its shape fairly exactly. Our interpretation of this  
 230 phenomenon is that, since temperature curves of course correlate strongly with the spatial locations,  
 231 including more flexible spatial effects tends to attenuate the effect of temperature. The estimated  
 232 spatial effects (see Figure 43) are very similar for the four different model specifications because  
 233 residual curves of neighboring locations are very similar even for the model with independence  
 234 assumption in this case (not shown) so that the specification of a spatial correlation structure seems  
 235 to make fairly little difference in terms of the BLUPs. As expected, observed residuals  $\hat{\epsilon}_{it}$  are  
 236 occasionally somewhat larger for the models with stronger spatial autocorrelation (see Figure 44).  
 237 The advantage of specifying a correlation structure for the random effects in this case is that it  
 238 allows interpolation or prediction for previously unobserved locations and improves precision of the  
 239 estimates if the specified correlation structure approximates the true one.

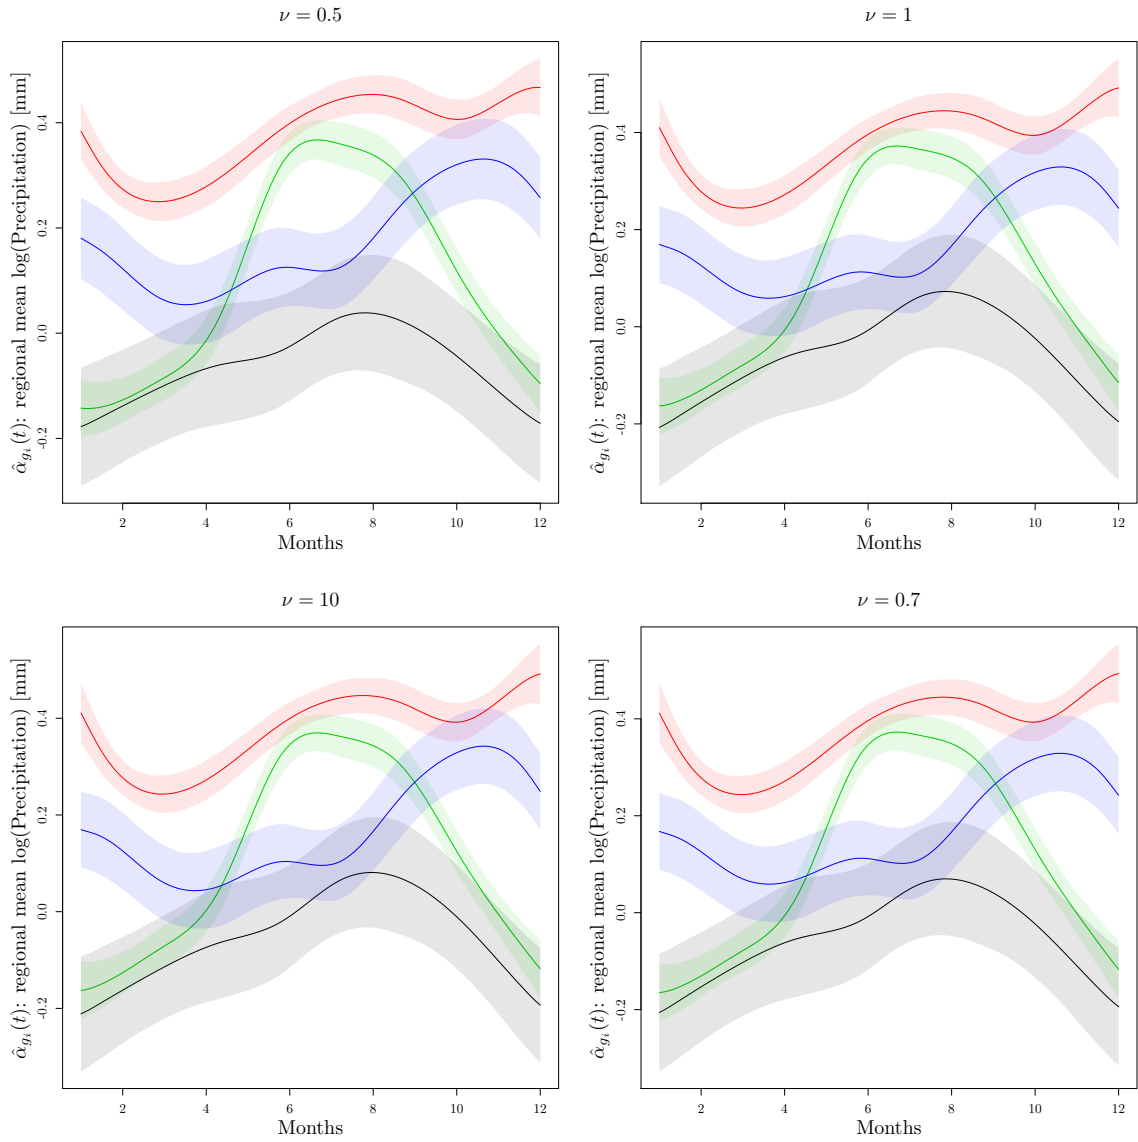

**Figure 41:** Estimated region effects for the models with spatially correlated smooth residuals.

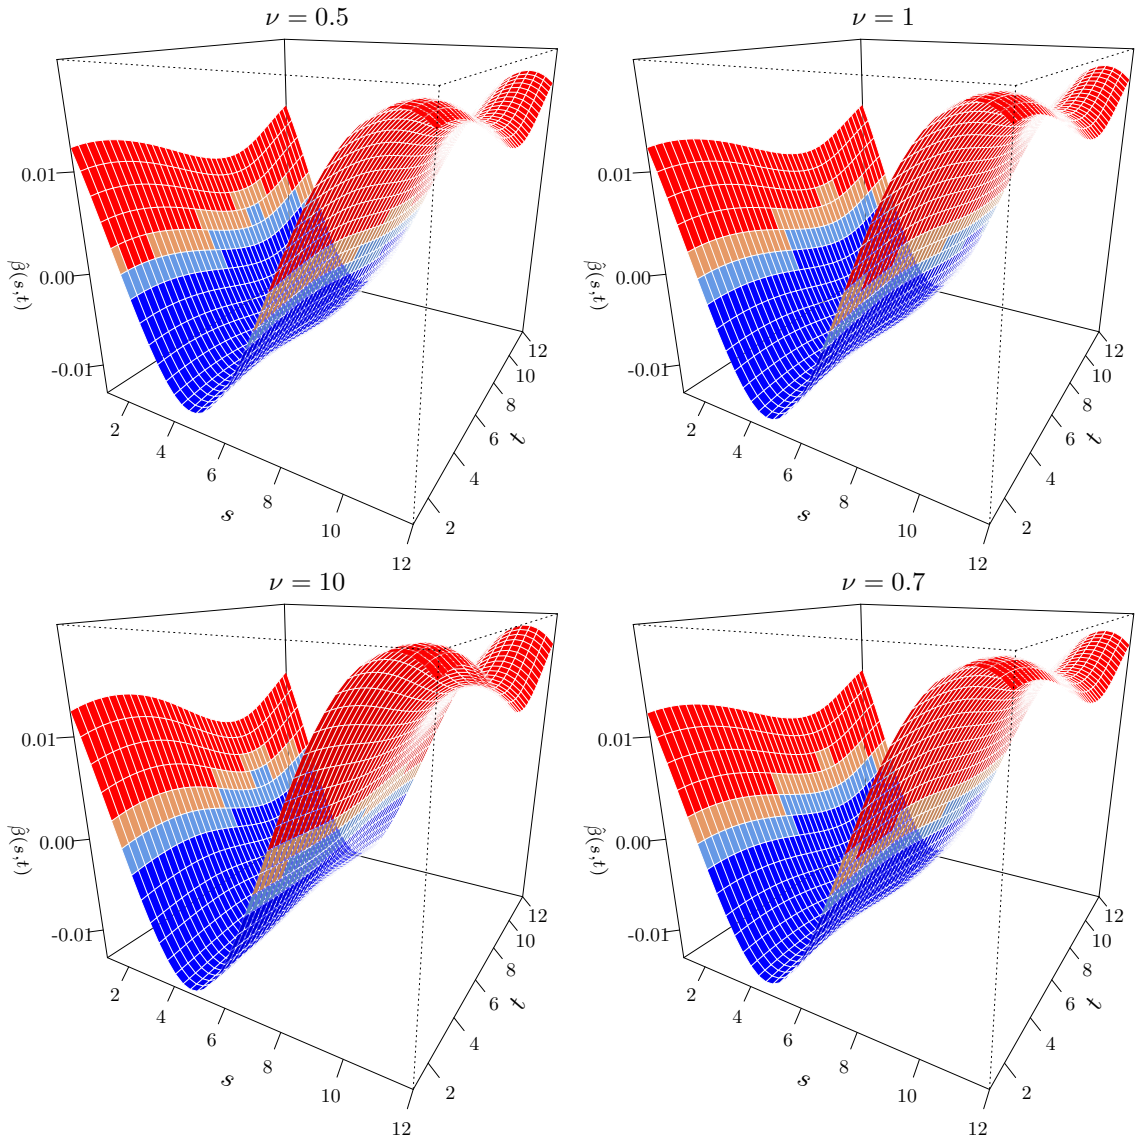

**Figure 42:** Estimated functional effect  $\hat{\beta}(s, t)$  of temperature in month  $s$  on log-precipitation in month  $t$ , color-coded for sign and pointwise significance (95%): blue if sig.  $< 0$ , lightblue if  $< 0$ , lightred if  $> 0$ , red if sig.  $> 0$ .

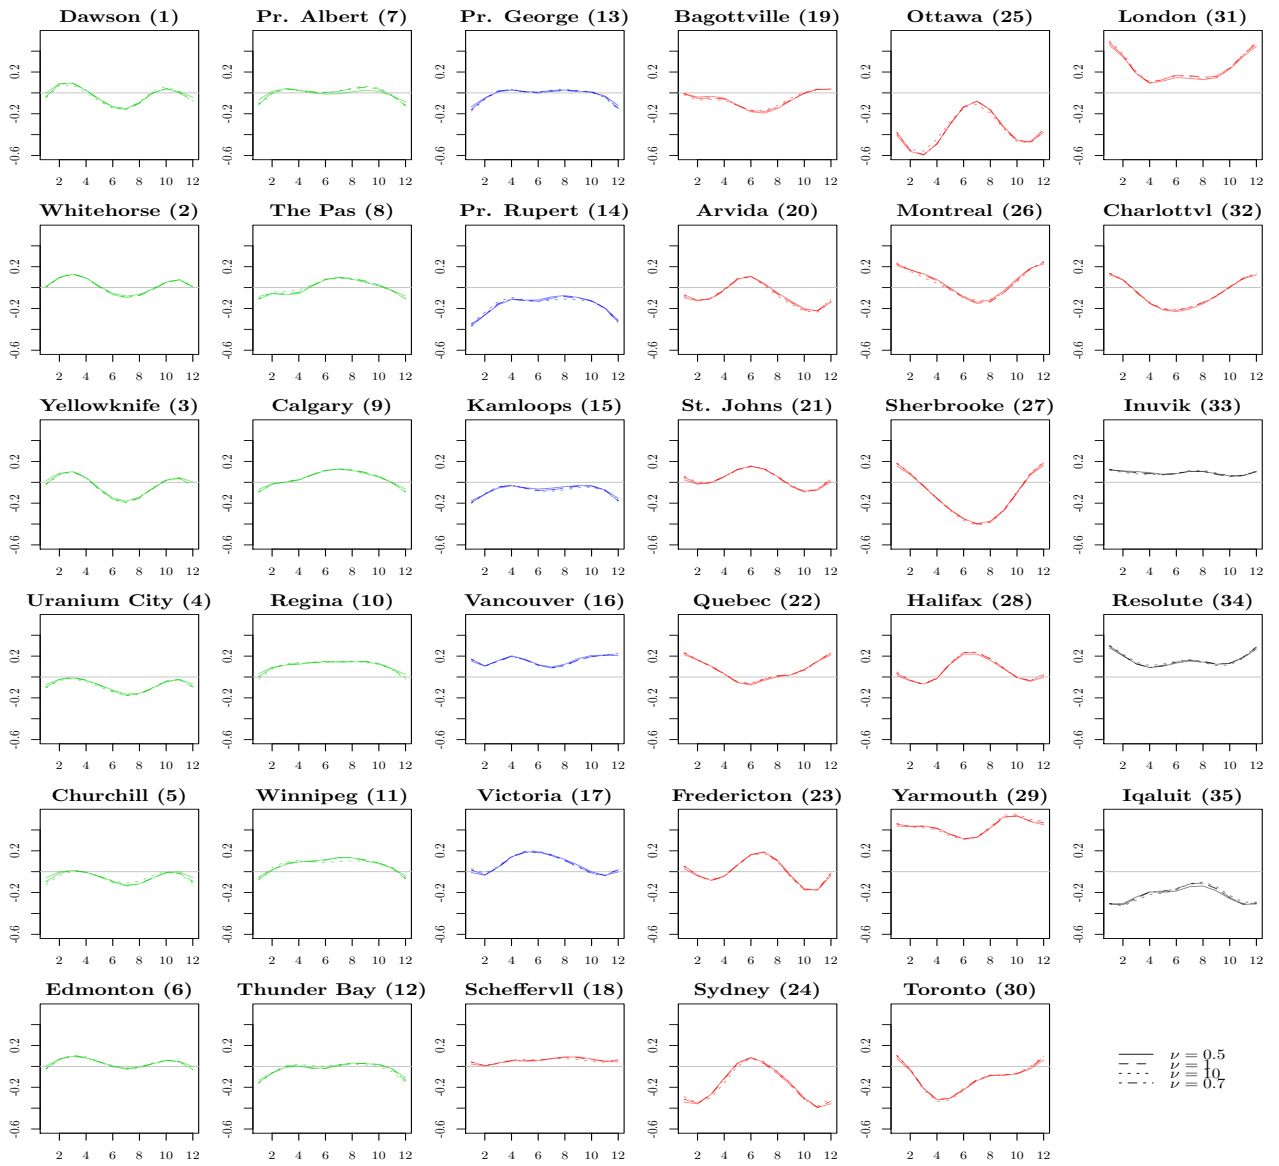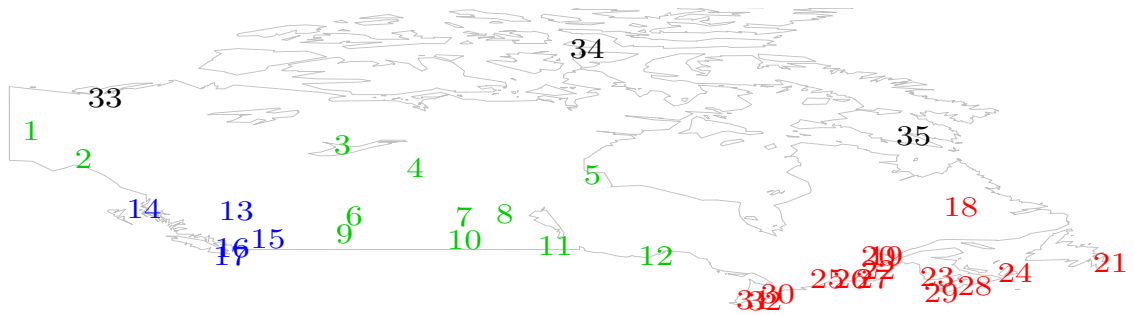

**Figure 43:** Spatially correlated random effects for each weather station for the model with regional effects. Stations are roughly ordered from north-west to south-east within regions. Color coding for regions as in previous figures, line types code for the 4 different models.

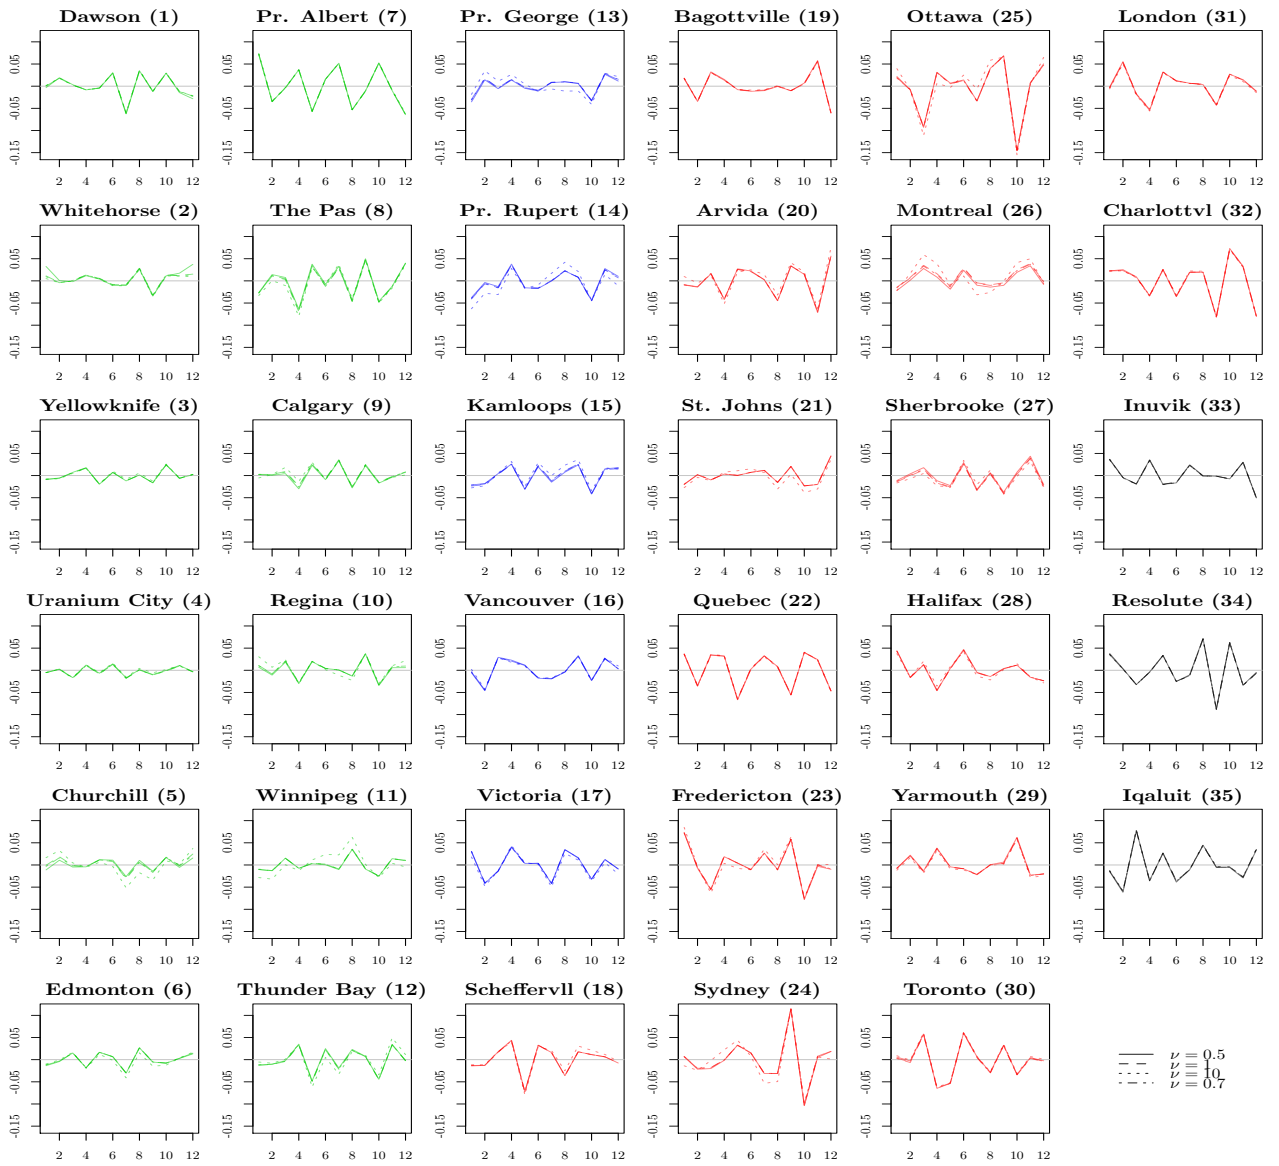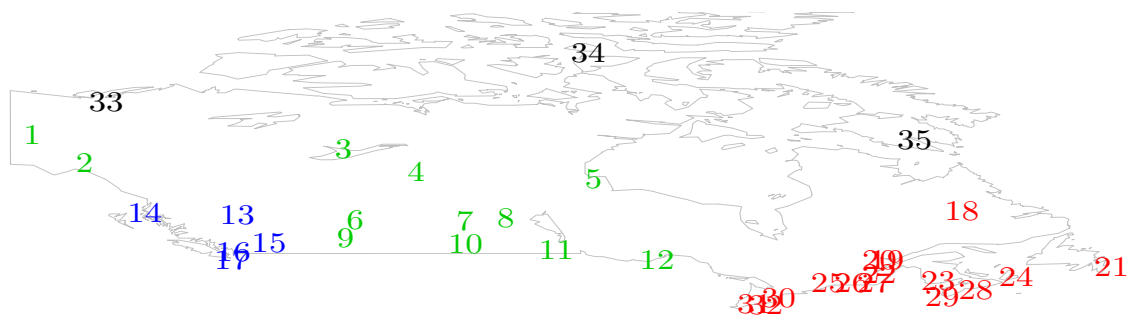

**Figure 44:** Observed residuals  $y_i(t) - \hat{y}_i(t)$  for each weather station for the model with regional effects. Stations are roughly ordered from north-west to south-east within regions. Color coding for regions as in previous figures, line types code for the 4 different models.

#### 240 C.4 Model 6b: FPC-based function-on-function effect

241 Instead of relying on a spline-based representation of the temperature effect, we can also fit a model  
 242 based on an estimated FPC decomposition  $x_i(s) \approx \sum_{k=1}^{K_x} \hat{\psi}_k(s) \hat{\xi}_{ik}$  of the (centered) temperature  
 243 curves, i.e. we re-parameterize  $\int_{\mathcal{S}} x_i(s) \beta(s, t) ds \approx \int_{\mathcal{S}} \sum_{k=1}^{K_x} \psi_k(s) \xi_{ik} \beta(s, t) ds = \sum_{k=1}^{K_x} \xi_{ik} \tilde{\beta}_k(t)$  with  
 244  $\tilde{\beta}_k(t) = \int_{\mathcal{S}} \psi_k(s) \beta(s, t) ds$ . In other words, a linear function-on-function effect can be represented as  
 245 a sum of varying coefficient terms for the FPC loading vectors  $\hat{\xi}_k$ . In `pffr`, we can specify such an  
 246 effect as an `ffpc` term. In this case, we set `npc = K_x = 4`. Specifications for the region effects and  
 247 spatially correlated random effects are the same as in the previous subsection.

```
mR_nu.7.ffpc <- pffr(l10precip ~ 0 + c(0) + region + c(region) +
  s(place, bs="mrf", k=35, xt=list(list(penalty=P_nu.7))) +
  ffpc(temp, yind=month.t, xind=month.s,
    splinepars=list(bs="cc", k=4),
    decompvars=list(npc=4),
      bs.int = list(bs = "cc", k=10), bs.yindex = list(bs="cc"),
      data=dataM, yind = month.t,
      knots=list(month.t.vec=c(0.5,12.5), temp.tmat=c(0.5,12.5),
        temp.smat=c(0.5,12.5)))
summary(mR_nu.7.ffpc)
```

248 Figure 45 displays the estimated precipitation effect from this model specification and the  
 249 corresponding spline-based specification for comparison. Region effects and spatially correlated  
 250 random effects are not shown, they are visually indistinguishable from those in the spline-based  
 251 specification. The top row shows the first four estimated FPCs  $\hat{\psi}_k(s)$  of the temperature profiles  
 252 on the left and the associated coefficient function estimates  $\tilde{\beta}_k(t)$  for the first four FPC loading  
 253 vectors with pointwise approximate 95 % CIs. As for the coefficient surface representation in the  
 254 spline-based models, it is immediately obvious that the effect of temperature on precipitation is  
 255 fairly constant over  $t$ , as all the  $\tilde{\beta}_k(t)$  are almost constant over  $t$ . Since the estimated FPCs are not  
 256 cyclic over  $s$ , as would be appropriate in this setting, interpretation is a little iffy: For example, the  
 257 extreme sign changes between December and January for FPCs 3 and 4 are an unavoidable artefact  
 258 of the orthonormality constraint on the FPCs. FPC number 4 (blue) loads strongly on above-average  
 259 temperatures in late summer and autumn and below average temperature in late winter and spring,  
 260 and this seems to have a strong positive association ( $\tilde{\beta}_4(t) \approx 0.04$ ) with increased precipitation  
 261 throughout the year. FPC number 1 (orange) loads strongly on below-average temperatures in  
 262 the winter months. The shape of FPC number 2 is almost a mirror image of that of FPC number  
 263 1, as is the shape of the associated  $\tilde{\beta}_2(t)$ , so it's hard to separate the effect of these two — both  
 264 seem to be associated with less precipitation in winter and spring ( $\tilde{\beta}_1(t) \approx -0.01$  for winter and  
 265 spring,  $\tilde{\beta}_2(t) \approx 0.01$ ), but not associated quite as strongly with precipitation in the summer and  
 266 autumn. The bottom row shows the coefficient surface implied by  $\hat{\psi}_k(s)$  and the associated  $\tilde{\beta}_k(t)$  on  
 267 the left and, for comparison, the coefficient surface estimate from the spline-based model. It is easy  
 268 to see that both model specifications result in qualitatively very similar effect shapes. In this setting,  
 269 the spline-based estimate seems more appropriate as it is able to accommodate the cyclic nature  
 270 of the data at hand. That the effects of temperature in December and January on precipitation  
 271 profiles have opposing signs and similar magnitude in the FPC-based estimate is a consequence of  
 272 the (not quite interpretable) shapes of FPCs 3 and 4. Nevertheless, FPC-based specifications could  
 273 conceivably increase interpretability in many settings.

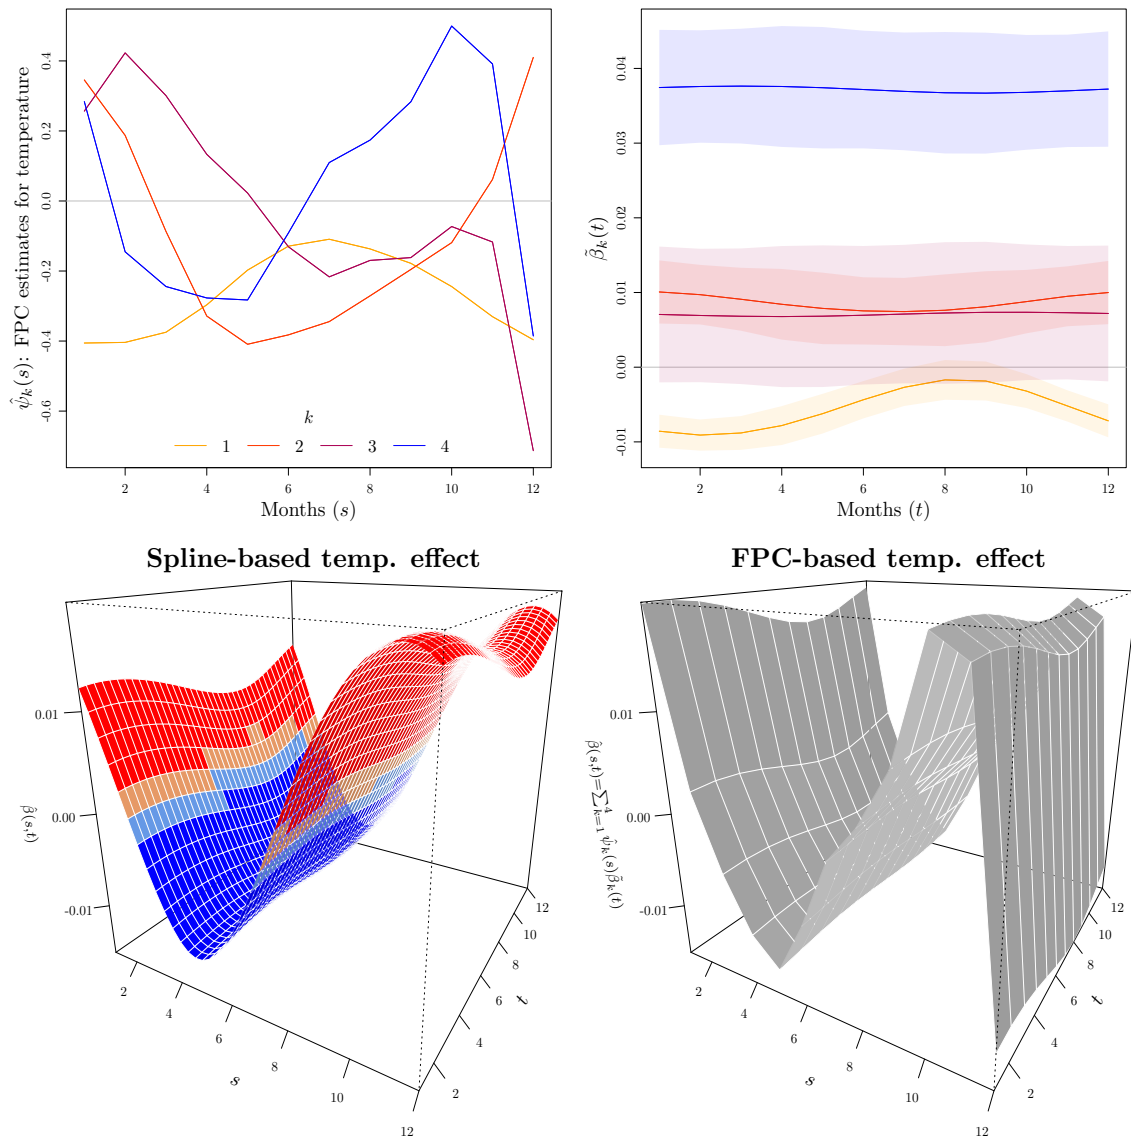

**Figure 45:** Clockwise from top left: First four estimated FPCs  $\hat{\psi}_k(s)$  of the temperature profiles; Coefficient function estimates  $\hat{\beta}_k(t)$  (color-coded) for the first four FPC loading vectors (with pointwise approximate 95 % CIs); Coefficient surface implied by  $\hat{\beta}_k(t)$  and  $\hat{\psi}_k(s)$ ; Estimated coefficient surface from the corresponding spline-based specification.



## 274 Computational Details

275 This section was compiled with knitr (Xie, 2012), under the following setup:

```
sessionInfo()
## R version 3.0.1 (2013-05-16)
## Platform: x86_64-pc-linux-gnu (64-bit)
##
## locale:
## [1] LC_CTYPE=en_US.UTF-8      LC_NUMERIC=C              LC_TIME=en_US.UTF-8
## [4] LC_COLLATE=en_US.UTF-8    LC_MONETARY=en_US.UTF-8  LC_MESSAGES=en_US.UTF-8
## [7] LC_PAPER=C                LC_NAME=C                 LC_ADDRESS=C
## [10] LC_TELEPHONE=C           LC_MEASUREMENT=en_US.UTF-8 LC_IDENTIFICATION=C
##
## attached base packages:
## [1] splines      stats      graphics  grDevices  utils      datasets  methods    base
##
## other attached packages:
## [1] refund_0.1-7   boot_1.3-9   gamm4_0.1-6   lme4_0.999999-2 wavethresh_4.6.5
## [6] nlme_3.1-110  magic_1.5-4   abind_1.4-0   glmnet_1.9-3    MASS_7.3-27
## [11] fields_6.7.6  spam_0.29-3  mapdata_2.2-2 maps_2.3-2     fda_2.3.6
## [16] Matrix_1.0-12 lattice_0.20-15 zoo_1.7-10    mgcv_1.7-24    tikzDevice_0.6.3
## [21] filehash_2.2-1 ggplot2_0.9.3.1 knitr_1.2
##
## loaded via a namespace (and not attached):
## [1] codetools_0.2-8  colorspace_1.2-2  dichromat_2.0-0  digest_0.6.3
## [5] evaluate_0.4.4   formatR_0.8        grid_3.0.1       gtable_0.1.2
## [9] labeling_0.2     munsell_0.4        plyr_1.8          proto_0.3-10
## [13] RColorBrewer_1.0-5 reshape2_1.2.2    scales_0.2.3     stats4_3.0.1
## [17] stringr_0.6.2    tcltk_3.0.1       tools_3.0.1
```

276 The version of pffr used for this supplement is included in the code folder.

## 277 References

- 278 Crainiceanu, C. M., P. T. Reiss (Coordinating authors), J. Goldsmith, S. Greven, L. Huang, and  
279 F. Scheipl (Contributors) (2011). *refund: Regression with Functional Data*. R package version  
280 0.1-5.
- 281 Herrick, R. (2013). *WFMM* (Version 3.0 ed.). The University of Texas M.D. Anderson Cancer  
282 Center.
- 283 Ramsay, J. O. and B. W. Silverman (2005). *Functional Data Analysis*. Springer.
- 284 Ramsay, J. O., H. Wickham, S. Graves, and G. Hooker (2011). *fda: Functional Data Analysis*. R  
285 package version 2.2.7.
- 286 Scheipl, F. and S. Greven (2012). Identifiability in penalized function-on-function regression models.  
287 Technical Report 125, LMU München.
- 288 Wood, S. N. (2006). *Generalized Additive Models: An Introduction with R*. Chapman & Hall/CRC.
- 289 Xie, Y. (2012). *knitr: A general-purpose package for dynamic report generation in R*. R package  
290 version 0.4.
